# Supplementary material
Source: MDPI journal article supplement (https://www.mdpi.com/1424-8247/15/8/935)
Supplement: s1 [file s1]

Electronic Supporting Information for:

## **A quantum chemical deep-dive into the $\pi$ - $\pi$ interactions of 3-methylindole and its halogenated derivatives – towards an improved ligand design and tryptophan stacking**

Ruben Van Lommel <sup>1,2,\*</sup>, Tom Bettens <sup>1</sup>, Thomas M. A. Barlow <sup>3</sup>, Jolien Bertouille <sup>3</sup>, Steven Ballet <sup>3,\*</sup> and Frank De Proft <sup>1,\*</sup>

<sup>1</sup> Eenheid Algemene Chemie (ALGC), Faculty of Science and Bio-engineering Sciences, Vrije Universiteit Brussel (VUB), Pleinlaan 2, 1050 Brussels, Belgium.

<sup>2</sup> Molecular Design and Synthesis, Department of Chemistry, KU Leuven, Celestijnenlaan 200F Leuven Chem&Tech, box 2404, 3001 Leuven, Belgium.

<sup>3</sup> Research Group of Organic Chemistry (ORGC), Faculty of Science and Bio-engineering Sciences, Vrije Universiteit Brussel (VUB), Pleinlaan 2, 1050 Brussels, Belgium.

\* Correspondence: ruben.vanlommel@kuleuven.be, steven.ballet@vub.be, fdeprof@vub.be

**Electronic Supporting Information**  
*- Table of contents -*

|           |                                                      |          |
|-----------|------------------------------------------------------|----------|
| <b>1.</b> | <b>Energy decomposition analyses</b>                 | <b>3</b> |
| <b>2.</b> | <b>Monomer descriptors</b>                           | <b>4</b> |
| <b>3.</b> | <b>Model optimization and performance statistics</b> | <b>5</b> |
| <b>4.</b> | <b>Cartesian coordinates</b>                         | <b>9</b> |

## 1. Energy decomposition analyses

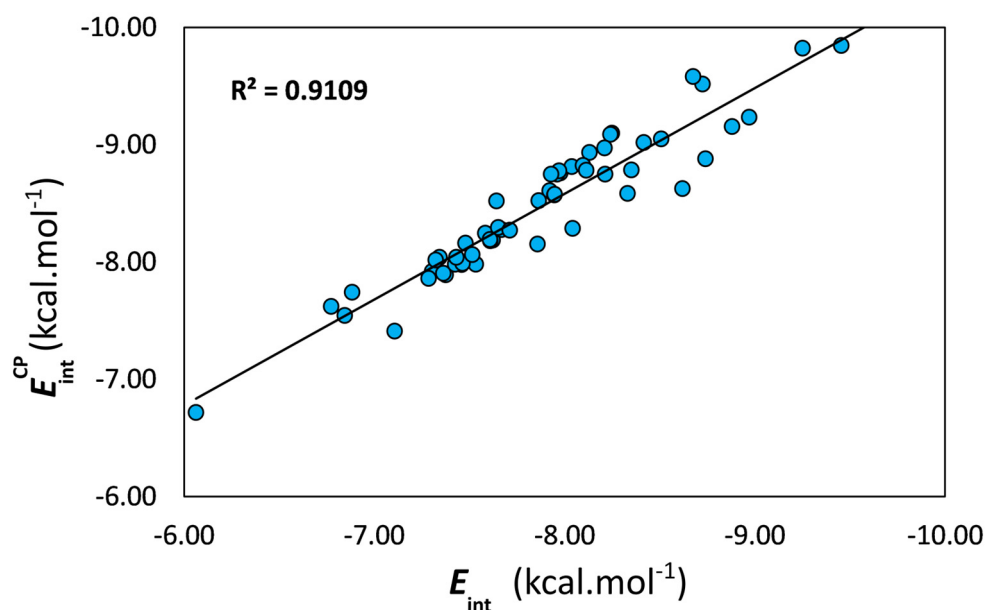

**Figure S1.** Correlation between counterpoise-corrected interaction energies ( $E_{int}^{CP}$ ) and the interaction energy stemming from the energies decomposition analyses ( $E_{int}$ ).

**Table S1.** Results of the energy decomposition analyses of the 3-methylindole dimers set. In this table, the interaction energy ( $\Delta E_{int}$ ), the electrostatic ( $\Delta V_{elstat}$ ), Pauli repulsion ( $\Delta E_{Pauli}$ ) and orbital interaction ( $\Delta E_{oi}$ ) terms have been computed at the M06/TZ2P(ZORA) level of theory and expressed relative to the parent *H-H* dimer for comparative purposes. All calculations were performed in the gas phase and values are expressed in kcal.mol<sup>-1</sup>.

| Dimer   | $\Delta E_{int}$<br>(kcal.mol <sup>-1</sup> ) | $\Delta V_{elstat}$<br>(kcal.mol <sup>-1</sup> ) | $\Delta E_{Pauli}$<br>(kcal.mol <sup>-1</sup> ) | $\Delta E_{oi}$<br>(kcal.mol <sup>-1</sup> ) |
|---------|-----------------------------------------------|--------------------------------------------------|-------------------------------------------------|----------------------------------------------|
| H-H     | 0.00                                          | 0.00                                             | 0.00                                            | 0.00                                         |
| H-4F    | -0.06                                         | -0.42                                            | 0.65                                            | -0.29                                        |
| H-4Cl   | -0.57                                         | -0.65                                            | 0.50                                            | -0.41                                        |
| H-4Br   | -0.63                                         | -0.70                                            | 0.60                                            | -0.52                                        |
| H-4I    | -0.83                                         | -0.92                                            | 0.67                                            | -0.58                                        |
| H-5F    | 0.21                                          | 0.00                                             | 0.25                                            | -0.05                                        |
| H-5Cl   | 0.00                                          | -0.07                                            | 0.12                                            | -0.04                                        |
| H-5Br   | -0.09                                         | -0.29                                            | 0.41                                            | -0.20                                        |
| H-5I    | 0.03                                          | -0.38                                            | 0.47                                            | -0.06                                        |
| H-6F    | 0.29                                          | -0.26                                            | 0.80                                            | -0.25                                        |
| H-6Cl   | -0.11                                         | -0.76                                            | 1.01                                            | -0.36                                        |
| H-6Br   | -0.42                                         | -1.02                                            | 1.14                                            | -0.53                                        |
| H-6I    | -0.60                                         | -0.93                                            | 0.74                                            | -0.41                                        |
| H-7F    | 0.15                                          | 0.02                                             | 0.26                                            | -0.12                                        |
| H-7Cl   | 0.27                                          | -0.09                                            | 0.48                                            | -0.12                                        |
| H-7Br   | 0.21                                          | 0.27                                             | 0.03                                            | -0.09                                        |
| H-7I    | 0.20                                          | 0.30                                             | -0.12                                           | 0.02                                         |
| 4F-4F   | 0.03                                          | -0.02                                            | 0.12                                            | -0.07                                        |
| 4Cl-4Cl | -0.56                                         | -1.08                                            | 0.96                                            | -0.43                                        |
| 4Br-4Br | -0.91                                         | -0.93                                            | 0.66                                            | -0.64                                        |
| 4I-4I   | -1.64                                         | -1.94                                            | 1.43                                            | -1.13                                        |
| 4F-5F   | 0.20                                          | -0.15                                            | 0.55                                            | -0.19                                        |
| 4Cl-5Cl | -0.56                                         | -1.08                                            | 0.96                                            | -0.43                                        |
| 4Br-5Br | -0.59                                         | -1.12                                            | 1.19                                            | -0.66                                        |
| 4I-5I   | -0.86                                         | -1.60                                            | 1.54                                            | -0.80                                        |
| 4F-6F   | 0.28                                          | -0.17                                            | 0.63                                            | -0.18                                        |
| 4Cl-6Cl | -0.56                                         | -1.16                                            | 1.17                                            | -0.56                                        |
| 4Br-6Br | -0.75                                         | -1.20                                            | 1.18                                            | -0.72                                        |
| 4I-6I   | -1.05                                         | -1.68                                            | 1.28                                            | -0.64                                        |

|         |       |       |       |       |
|---------|-------|-------|-------|-------|
| 4F-7F   | 0.17  | -1.13 | 2.03  | -0.74 |
| 4Cl-7Cl | -0.34 | -0.54 | 0.47  | -0.26 |
| 4Br-7Br | -0.64 | -0.65 | 0.47  | -0.45 |
| 4I-7I   | -0.69 | -0.68 | 0.27  | -0.29 |
| 5F-5F   | 1.47  | 1.16  | 0.16  | 0.15  |
| 5Cl-5Cl | -0.60 | 0.02  | -0.43 | -0.18 |
| 5Br-5Br | -1.33 | -0.19 | -0.57 | -0.57 |
| 5I-5I   | -1.83 | -0.72 | -0.43 | -0.68 |
| 5F-6F   | 0.78  | 0.47  | 0.25  | 0.06  |
| 5Cl-6Cl | 0.15  | -0.41 | 0.73  | -0.17 |
| 5Br-6Br | -0.33 | -0.80 | 0.96  | -0.49 |
| 5I-6I   | -0.40 | -0.76 | 0.64  | -0.27 |
| 5F-7F   | 0.33  | 0.00  | 0.50  | -0.17 |
| 5Cl-7Cl | 0.13  | 0.10  | 0.09  | -0.06 |
| 5Br-7Br | 0.00  | 0.14  | 0.03  | -0.17 |
| 5I-7I   | -0.10 | 0.20  | -0.19 | -0.11 |
| 6F-6F   | 0.64  | -0.43 | 1.40  | -0.32 |
| 6Cl-6Cl | -0.39 | -0.71 | 0.69  | -0.36 |
| 6Br-6Br | -0.90 | -1.40 | 1.38  | -0.89 |
| 6I-6I   | -0.97 | -1.12 | 0.70  | -0.55 |
| 6F-7F   | 0.44  | -0.53 | 1.35  | -0.38 |
| 6Cl-7Cl | -0.79 | -1.43 | 1.44  | -0.79 |
| 6Br-7Br | -1.40 | -1.69 | 1.44  | -1.15 |
| 6I-7I   | -1.66 | -1.79 | 1.26  | -1.13 |
| 7F-7F   | 0.57  | -0.19 | 1.12  | -0.36 |
| 7Cl-7Cl | -0.09 | -0.18 | 0.48  | -0.38 |
| 7Br-7Br | -0.39 | 0.09  | 0.10  | -0.57 |
| 7I-7I   | -0.44 | -0.29 | 0.21  | -0.36 |

## 2. Monomer descriptors

**Table S2.** Values of the computed descriptors of the 3-methylindole monomers (#).

| #                          | IE<br>(a.u.) | EA<br>(a.u.) | $\mu$<br>(D) | $\alpha$<br>(a.u.) | $\eta$<br>(a.u.) | S<br>(a.u.) | ESP <sub>max</sub><br>(kcal/<br>mol) | ESP <sub>min</sub><br>(kcal/<br>mol) | s <sup>0</sup> <sub>max</sub><br>(a.u.) | s <sup>+</sup> <sub>max</sub><br>(a.u.) | s <sup>-</sup> <sub>max</sub><br>(a.u.) | $\alpha_{zz}$<br>(a.u.) |
|----------------------------|--------------|--------------|--------------|--------------------|------------------|-------------|--------------------------------------|--------------------------------------|-----------------------------------------|-----------------------------------------|-----------------------------------------|-------------------------|
| 3-methylindole derivatives |              |              |              |                    |                  |             |                                      |                                      |                                         |                                         |                                         |                         |
| H                          | 0.2735       | -0.0512      | 2.01         | 107.06             | 0.1631           | 6.13        | 2.35                                 | -11.19                               | -2.35E-05                               | 6.08E-02                                | 3.73E-02                                | 56.77                   |
| 4F                         | 0.2758       | -0.0516      | 3.04         | 106.73             | 0.1643           | 6.09        | 3.66                                 | -8.87                                | 1.46E-05                                | 3.23E-02                                | 3.02E-02                                | 56.56                   |
| 4Cl                        | 0.2756       | -0.0390      | 3.46         | 120.07             | 0.1581           | 6.33        | 3.03                                 | -9.21                                | 5.85E-02                                | 2.86E-02                                | 3.00E-02                                | 62.10                   |
| 4Br                        | 0.2744       | -0.0363      | 3.50         | 127.20             | 0.1561           | 6.41        | 4.28                                 | -9.85                                | 8.00E-02                                | 4.18E-02                                | 4.28E-02                                | 65.55                   |
| 4I                         | 0.2698       | -0.0336      | 3.43         | 140.45             | 0.1521           | 6.57        | 4.03                                 | -10.37                               | 1.85E-01                                | 7.40E-02                                | 1.12E-01                                | 75.52                   |
| 5F                         | 0.2799       | -0.0424      | 3.53         | 107.16             | 0.1616           | 6.19        | 4.69                                 | -8.70                                | 8.79E-02                                | 5.12E-02                                | 3.67E-02                                | 56.75                   |
| 5Cl                        | 0.2806       | -0.0366      | 4.03         | 121.53             | 0.1590           | 6.29        | 5.77                                 | -9.89                                | 8.57E-02                                | 5.09E-02                                | 3.49E-02                                | 62.42                   |
| 5Br                        | 0.2796       | -0.0349      | 4.06         | 129.06             | 0.1575           | 6.35        | 5.86                                 | -10.59                               | 8.40E-02                                | 5.04E-02                                | 3.37E-02                                | 66.06                   |
| 5I                         | 0.2753       | -0.0333      | 3.93         | 142.98             | 0.1539           | 6.50        | 5.81                                 | -11.08                               | 1.66E-01                                | 5.18E-02                                | 1.14E-01                                | 76.50                   |
| 6F                         | 0.2773       | -0.0460      | 2.83         | 107.03             | 0.1623           | 6.16        | 3.25                                 | -8.51                                | 1.07E-01                                | 7.02E-02                                | 3.67E-02                                | 56.82                   |
| 6Cl                        | 0.2774       | -0.0371      | 3.31         | 122.40             | 0.1578           | 6.34        | 5.13                                 | -8.98                                | 8.95E-02                                | 5.40E-02                                | 3.57E-02                                | 62.53                   |
| 6Br                        | 0.2761       | -0.0347      | 3.34         | 130.17             | 0.1558           | 6.42        | 3.98                                 | -9.67                                | 8.58E-02                                | 5.09E-02                                | 3.85E-02                                | 66.20                   |
| 6I                         | 0.2715       | -0.0325      | 3.23         | 144.43             | 0.1520           | 6.58        | 4.05                                 | -10.13                               | 1.83E-01                                | 6.53E-02                                | 1.18E-01                                | 76.61                   |
| 7F                         | 0.2782       | -0.0506      | 1.73         | 107.00             | 0.1650           | 6.06        | 2.28                                 | -8.89                                | 9.46E-02                                | 5.99E-02                                | 3.47E-02                                | 56.64                   |
| 7Cl                        | 0.2790       | -0.0379      | 1.78         | 120.44             | 0.1591           | 6.28        | 1.85                                 | -8.45                                | 8.75E-02                                | 5.26E-02                                | 3.49E-02                                | 62.15                   |
| 7Br                        | 0.2781       | -0.0353      | 1.76         | 127.52             | 0.1574           | 6.35        | 1.66                                 | -8.47                                | 8.54E-02                                | 5.08E-02                                | 3.47E-02                                | 65.83                   |
| 7I                         | 0.2747       | -0.0328      | 1.64         | 141.18             | 0.1543           | 6.48        | 1.74                                 | -8.70                                | 1.65E-01                                | 7.37E-02                                | 9.17E-02                                | 76.17                   |

**Table S3.** Values of the computed descriptors of the toluene monomers (#)

| #                          | IE (a.u.) | $\alpha$ (a.u.) | $s^0_{\max}$ (a.u.) |
|----------------------------|-----------|-----------------|---------------------|
| <b>Toluene derivatives</b> |           |                 |                     |
| H                          | 0.3205    | 76.39           | 2.92E-02            |
| <i>o</i> F                 | 0.3235    | 76.37           | 6.20E-02            |
| <i>m</i> F                 | 0.3252    | 76.56           | 6.84E-02            |
| <i>p</i> F                 | 0.3190    | 76.53           | 3.07E-02            |
| <i>o</i> Cl                | 0.3209    | 89.22           | 6.06E-02            |
| <i>m</i> Cl                | 0.3211    | 90.06           | 2.69E-02            |
| <i>p</i> Cl                | 0.3156    | 90.48           | 2.95E-02            |
| <i>o</i> Br                | 0.3167    | 96.09           | 6.96E-02            |
| <i>m</i> Br                | 0.3161    | 97.14           | 8.74E-02            |
| <i>p</i> Br                | 0.3111    | 97.68           | 3.81E-02            |
| <i>o</i> I                 | 0.3055    | 109.34          | 1.42E-01            |
| <i>m</i> I                 | 0.3045    | 110.76          | 1.01E-01            |
| <i>p</i> I                 | 0.3002    | 111.58          | 1.22E-01            |

### 3. Model optimization and performance statistics

**Table S4.** Dimer descriptors are calculated as the sum of the descriptor values of the respective monomers. This table collects the dimer descriptors calculated for the 3-methylindole dimers used to construct the model. Dimers that were excluded during the training of the model, but used during validation are annotated with the letter <sup>v</sup>.

| #                            | $\Sigma$ IE<br>(a.u.) | $\Sigma$ EA<br>(a.u.) | $\Sigma\mu$<br>(D) | $\Sigma\alpha$<br>(a.u.) | $\Sigma\eta$<br>(a.u.) | $\Sigma S$<br>(a.u.) | $\Sigma ESP_{\max}$<br>(kcal/mol) | $\Sigma ESP_{\min}$<br>(kcal/mol) | $\Sigma s^0_{\max}$<br>(a.u.) | $\Sigma s^+_{\max}$<br>(a.u.) | $\Sigma s^-_{\max}$<br>(a.u.) | $\Sigma\alpha_{zz}$<br>(a.u.) |
|------------------------------|-----------------------|-----------------------|--------------------|--------------------------|------------------------|----------------------|-----------------------------------|-----------------------------------|-------------------------------|-------------------------------|-------------------------------|-------------------------------|
| <b>3-methylindole dimers</b> |                       |                       |                    |                          |                        |                      |                                   |                                   |                               |                               |                               |                               |
| H-H <sup>v</sup>             | 0.5471                | -0.1023               | 4.02               | 214.12                   | 0.3263                 | 12.26                | 4.70                              | -22.39                            | -4.69E-05                     | 1.22E-01                      | 7.46E-02                      | 113.54                        |
| H-4F                         | 0.5494                | -0.1027               | 5.05               | 213.79                   | 0.3275                 | 12.22                | 6.01                              | -20.07                            | -8.83E-06                     | 9.30E-02                      | 6.75E-02                      | 113.33                        |
| H-4Cl                        | 0.5491                | -0.0902               | 5.47               | 227.13                   | 0.3212                 | 12.46                | 5.38                              | -20.40                            | 5.85E-02                      | 8.94E-02                      | 6.73E-02                      | 118.87                        |
| H-Br                         | 0.5479                | -0.0874               | 5.51               | 234.25                   | 0.3192                 | 12.54                | 6.63                              | -21.05                            | 7.99E-02                      | 1.03E-01                      | 8.02E-02                      | 122.32                        |
| H-I                          | 0.5434                | -0.0847               | 5.44               | 247.50                   | 0.3153                 | 12.70                | 6.38                              | -21.56                            | 1.85E-01                      | 1.35E-01                      | 1.49E-01                      | 132.29                        |
| H-5F                         | 0.5535                | -0.0935               | 5.54               | 214.22                   | 0.3248                 | 12.32                | 7.04                              | -19.89                            | 8.78E-02                      | 1.12E-01                      | 7.40E-02                      | 113.52                        |
| H-5Cl                        | 0.5541                | -0.0878               | 6.04               | 228.59                   | 0.3222                 | 12.42                | 8.12                              | -21.08                            | 8.57E-02                      | 1.12E-01                      | 7.22E-02                      | 119.18                        |
| H-5Br                        | 0.5532                | -0.0861               | 6.07               | 236.12                   | 0.3207                 | 12.48                | 8.21                              | -21.79                            | 8.40E-02                      | 1.11E-01                      | 7.11E-02                      | 122.83                        |
| H-5I <sup>v</sup>            | 0.5488                | -0.0845               | 5.94               | 250.04                   | 0.3171                 | 12.63                | 8.16                              | -22.28                            | 1.66E-01                      | 1.13E-01                      | 1.52E-01                      | 133.27                        |
| H-6F                         | 0.5508                | -0.0972               | 4.84               | 214.09                   | 0.3255                 | 12.29                | 5.60                              | -19.70                            | 1.07E-01                      | 1.31E-01                      | 7.40E-02                      | 113.58                        |
| H-6Cl                        | 0.5509                | -0.0883               | 5.32               | 229.46                   | 0.3209                 | 12.47                | 7.48                              | -20.17                            | 8.95E-02                      | 1.15E-01                      | 7.30E-02                      | 119.29                        |
| H-6Br                        | 0.5497                | -0.0859               | 5.35               | 237.23                   | 0.3190                 | 12.55                | 6.33                              | -20.87                            | 8.58E-02                      | 1.12E-01                      | 7.58E-02                      | 122.97                        |
| H-6I                         | 0.5450                | -0.0836               | 5.23               | 251.49                   | 0.3151                 | 12.71                | 6.40                              | -21.32                            | 1.83E-01                      | 1.26E-01                      | 1.56E-01                      | 133.38                        |
| H-7F                         | 0.5518                | -0.1018               | 3.74               | 214.06                   | 0.3281                 | 12.19                | 4.63                              | -20.09                            | 9.45E-02                      | 1.21E-01                      | 7.20E-02                      | 113.41                        |
| H-7Cl                        | 0.5525                | -0.0891               | 3.79               | 227.50                   | 0.3223                 | 12.41                | 4.20                              | -19.65                            | 8.75E-02                      | 1.13E-01                      | 7.22E-02                      | 118.92                        |
| H-7Br                        | 0.5516                | -0.0864               | 3.76               | 234.57                   | 0.3205                 | 12.48                | 4.01                              | -19.67                            | 8.54E-02                      | 1.12E-01                      | 7.20E-02                      | 122.60                        |
| H-7I <sup>v</sup>            | 0.5483                | -0.0840               | 3.64               | 248.24                   | 0.3174                 | 12.61                | 4.09                              | -19.90                            | 1.65E-01                      | 1.34E-01                      | 1.29E-01                      | 132.94                        |
| 4F-4F                        | 0.5517                | -0.1031               | 6.09               | 213.46                   | 0.3287                 | 12.17                | 7.32                              | -17.75                            | 2.93E-05                      | 6.45E-02                      | 6.03E-02                      | 113.12                        |
| 4Cl-4Cl <sup>v</sup>         | 0.5512                | -0.0780               | 6.93               | 240.14                   | 0.3162                 | 12.65                | 6.06                              | -18.41                            | 1.17E-01                      | 5.73E-02                      | 5.99E-02                      | 124.19                        |
| 4Br-4Br                      | 0.5487                | -0.0725               | 7.00               | 254.39                   | 0.3121                 | 12.82                | 8.57                              | -19.71                            | 1.60E-01                      | 8.37E-02                      | 8.57E-02                      | 131.10                        |

|                      |        |         |      |        |        |       |       |        |          |          |          |        |
|----------------------|--------|---------|------|--------|--------|-------|-------|--------|----------|----------|----------|--------|
| 4I-4I                | 0.5397 | -0.0671 | 6.86 | 280.89 | 0.3042 | 13.15 | 8.07  | -20.74 | 3.71E-01 | 1.48E-01 | 2.23E-01 | 151.04 |
| 4F-5F                | 0.5558 | -0.0939 | 6.57 | 213.89 | 0.3260 | 12.27 | 8.35  | -17.57 | 8.79E-02 | 8.34E-02 | 6.69E-02 | 113.31 |
| 4Cl-5Cl              | 0.5562 | -0.0757 | 7.50 | 241.60 | 0.3171 | 12.61 | 8.80  | -19.09 | 1.44E-01 | 7.96E-02 | 6.49E-02 | 124.51 |
| 4Br-5Br <sup>v</sup> | 0.5540 | -0.0712 | 7.56 | 256.26 | 0.3136 | 12.76 | 10.14 | -20.45 | 1.64E-01 | 9.23E-02 | 7.66E-02 | 131.61 |
| 4I-5I                | 0.5451 | -0.0669 | 7.36 | 283.43 | 0.3060 | 13.07 | 9.84  | -21.45 | 3.51E-01 | 1.26E-01 | 2.26E-01 | 152.02 |
| 4F-6F <sup>v</sup>   | 0.5531 | -0.0976 | 5.87 | 213.77 | 0.3267 | 12.25 | 6.91  | -17.38 | 1.07E-01 | 1.02E-01 | 6.69E-02 | 113.38 |
| 4Cl-6Cl <sup>v</sup> | 0.5530 | -0.0761 | 6.77 | 242.47 | 0.3159 | 12.66 | 8.16  | -18.18 | 1.48E-01 | 8.26E-02 | 6.56E-02 | 124.62 |
| 4Br-6Br <sup>v</sup> | 0.5505 | -0.0710 | 6.84 | 257.37 | 0.3119 | 12.82 | 8.26  | -19.53 | 1.66E-01 | 9.28E-02 | 8.13E-02 | 131.75 |
| 4I-6I <sup>v</sup>   | 0.5413 | -0.0660 | 6.66 | 284.88 | 0.3041 | 13.15 | 8.08  | -20.50 | 3.69E-01 | 1.39E-01 | 2.30E-01 | 152.13 |
| 4F-7F <sup>v</sup>   | 0.5541 | -0.1022 | 4.77 | 213.73 | 0.3293 | 12.15 | 5.94  | -17.77 | 9.46E-02 | 9.22E-02 | 6.49E-02 | 113.20 |
| 4Cl-7Cl              | 0.5546 | -0.0769 | 5.24 | 240.51 | 0.3172 | 12.61 | 4.88  | -17.66 | 1.46E-01 | 8.13E-02 | 6.49E-02 | 124.25 |
| 4Br-7Br              | 0.5525 | -0.0715 | 5.26 | 254.71 | 0.3134 | 12.76 | 5.95  | -18.32 | 1.65E-01 | 9.27E-02 | 7.75E-02 | 131.38 |
| 4I-7I <sup>v</sup>   | 0.5446 | -0.0664 | 5.07 | 281.62 | 0.3064 | 13.05 | 5.78  | -19.07 | 3.50E-01 | 1.48E-01 | 2.03E-01 | 151.70 |
| 5F-5F                | 0.5598 | -0.0847 | 7.06 | 214.33 | 0.3233 | 12.37 | 9.37  | -17.39 | 1.76E-01 | 1.02E-01 | 7.35E-02 | 113.50 |
| 5Cl-5Cl              | 0.5612 | -0.0733 | 8.07 | 243.06 | 0.3181 | 12.58 | 11.55 | -19.77 | 1.71E-01 | 1.02E-01 | 6.99E-02 | 124.83 |
| 5Br-5Br              | 0.5593 | -0.0698 | 8.12 | 258.13 | 0.3151 | 12.70 | 11.72 | -21.19 | 1.68E-01 | 1.01E-01 | 6.75E-02 | 132.13 |
| 5I-5I                | 0.5506 | -0.0666 | 7.86 | 285.96 | 0.3078 | 12.99 | 11.62 | -22.17 | 3.32E-01 | 1.04E-01 | 2.29E-01 | 153.00 |
| 5F-6F                | 0.5572 | -0.0884 | 6.36 | 214.20 | 0.3240 | 12.35 | 7.94  | -17.21 | 1.95E-01 | 1.21E-01 | 7.35E-02 | 113.57 |
| 5Cl-6Cl <sup>v</sup> | 0.5580 | -0.0738 | 7.35 | 243.93 | 0.3168 | 12.63 | 10.91 | -18.86 | 1.75E-01 | 1.05E-01 | 7.06E-02 | 124.94 |
| 5Br-6Br              | 0.5558 | -0.0696 | 7.40 | 259.23 | 0.3134 | 12.76 | 9.84  | -20.27 | 1.70E-01 | 1.01E-01 | 7.23E-02 | 132.26 |
| 5I-6I                | 0.5468 | -0.0658 | 7.15 | 287.41 | 0.3059 | 13.08 | 9.85  | -21.21 | 3.49E-01 | 1.17E-01 | 2.33E-01 | 153.11 |
| 5F-7F                | 0.5582 | -0.0930 | 5.26 | 214.16 | 0.3266 | 12.25 | 6.97  | -17.59 | 1.82E-01 | 1.11E-01 | 7.14E-02 | 113.39 |
| 5Cl-7Cl              | 0.5596 | -0.0746 | 5.81 | 241.97 | 0.3182 | 12.57 | 7.63  | -18.34 | 1.73E-01 | 1.04E-01 | 6.99E-02 | 124.57 |
| 5Br-7Br              | 0.5577 | -0.0702 | 5.82 | 256.58 | 0.3149 | 12.70 | 7.52  | -19.07 | 1.69E-01 | 1.01E-01 | 6.84E-02 | 131.89 |
| 5I-7I                | 0.5500 | -0.0661 | 5.57 | 284.16 | 0.3082 | 12.98 | 7.55  | -19.79 | 3.31E-01 | 1.25E-01 | 2.06E-01 | 152.67 |
| 6F-6F                | 0.5545 | -0.0921 | 5.66 | 214.07 | 0.3247 | 12.32 | 6.51  | -17.02 | 2.14E-01 | 1.40E-01 | 7.35E-02 | 113.63 |
| 6Cl-6Cl              | 0.5547 | -0.0742 | 6.62 | 244.81 | 0.3156 | 12.68 | 10.27 | -17.95 | 1.79E-01 | 1.08E-01 | 7.13E-02 | 125.05 |
| 6Br-6Br              | 0.5523 | -0.0695 | 6.68 | 260.34 | 0.3117 | 12.83 | 7.95  | -19.35 | 1.72E-01 | 1.02E-01 | 7.70E-02 | 132.40 |
| 6I-6I                | 0.5429 | -0.0649 | 6.45 | 288.86 | 0.3040 | 13.16 | 8.09  | -20.26 | 3.67E-01 | 1.31E-01 | 2.37E-01 | 153.22 |
| 6F-7F                | 0.5555 | -0.0966 | 4.56 | 214.03 | 0.3273 | 12.22 | 5.54  | -17.40 | 2.01E-01 | 1.30E-01 | 7.15E-02 | 113.45 |
| 6Cl-7Cl              | 0.5563 | -0.0750 | 5.09 | 242.84 | 0.3169 | 12.62 | 6.99  | -17.43 | 1.77E-01 | 1.07E-01 | 7.06E-02 | 124.68 |
| 6Br-7Br              | 0.5542 | -0.0700 | 5.10 | 257.68 | 0.3132 | 12.77 | 5.64  | -18.15 | 1.71E-01 | 1.02E-01 | 7.32E-02 | 132.03 |
| 6I-7I                | 0.5462 | -0.0653 | 4.86 | 285.61 | 0.3063 | 13.06 | 5.79  | -18.83 | 3.48E-01 | 1.39E-01 | 2.10E-01 | 152.78 |
| 7F-7F <sup>v</sup>   | 0.5565 | -0.1012 | 3.46 | 213.99 | 0.3300 | 12.12 | 4.56  | -17.79 | 1.89E-01 | 1.20E-01 | 6.94E-02 | 113.28 |
| 7Cl-7Cl              | 0.5579 | -0.0758 | 3.56 | 240.88 | 0.3183 | 12.57 | 3.71  | -16.90 | 1.75E-01 | 1.05E-01 | 6.99E-02 | 124.30 |
| 7Br-7Br              | 0.5562 | -0.0705 | 3.51 | 255.03 | 0.3148 | 12.71 | 3.32  | -16.94 | 1.71E-01 | 1.02E-01 | 6.94E-02 | 131.66 |
| 7I-7I <sup>v</sup>   | 0.5495 | -0.0656 | 3.27 | 282.36 | 0.3086 | 12.96 | 3.49  | -17.41 | 3.30E-01 | 1.47E-01 | 1.83E-01 | 152.35 |

**Table S5.** Parameter coefficient estimates, standard error and p-value for the descriptors present in the optimized model.

| Descriptor/term | Estimate  | Standard error | t ratio | p-value |
|-----------------|-----------|----------------|---------|---------|
| Intercept       | -18.09876 | 7.602228       | -2.38   | 0.0223  |
| IE              | 29.501211 | 13.12205       | 2.25    | 0.0303  |
| $\alpha$        | -0.026361 | 0.004152       | -6.35   | <.0001  |
| $S^0_{\max}$    | 1.7908569 | 1.008514       | 1.78    | 0.0836  |

**Table S6.** The explicitly calculated interaction energies of the 3-methylindole dimers and the predicted energies originating from the optimized model, both provided in kcal.mol<sup>-1</sup>.

| Dimer   | $E_{int}^{CP}$<br>(kcal.mol <sup>-1</sup> ) | $E_{int}^{Pred}$<br>(kcal.mol <sup>-1</sup> ) |
|---------|---------------------------------------------|-----------------------------------------------|
| H-H     | -7.62                                       | -7.60                                         |
| H-4F    | -7.58                                       | -7.53                                         |
| H-4Cl   | -7.98                                       | -7.78                                         |
| H-4Br   | -8.04                                       | -7.97                                         |
| H-4I    | -8.42                                       | -8.26                                         |
| H-5F    | -7.46                                       | -7.26                                         |
| H-5Cl   | -7.61                                       | -7.62                                         |
| H-5Br   | -7.67                                       | -7.85                                         |
| H-5I    | -7.86                                       | -8.20                                         |
| H-6F    | -7.38                                       | -7.30                                         |
| H-6Cl   | -7.65                                       | -7.74                                         |
| H-6Br   | -7.92                                       | -7.98                                         |
| H-6I    | -8.35                                       | -8.32                                         |
| H-7F    | -7.34                                       | -7.29                                         |
| H-7Cl   | -7.30                                       | -7.64                                         |
| H-7Br   | -7.42                                       | -7.86                                         |
| H-7I    | -7.53                                       | -8.17                                         |
| 4F-4F   | -7.48                                       | -7.45                                         |
| 4Cl-4Cl | -8.21                                       | -7.96                                         |
| 4Br-4Br | -8.25                                       | -8.33                                         |
| 4I-4I   | -9.25                                       | -8.92                                         |
| 4F-5F   | -7.46                                       | -7.18                                         |
| 4Cl-5Cl | -7.96                                       | -7.80                                         |
| 4Br-5Br | -7.97                                       | -8.22                                         |
| 4I-5I   | -8.51                                       | -8.86                                         |
| 4F-6F   | -7.36                                       | -7.23                                         |
| 4Cl-6Cl | -7.93                                       | -7.91                                         |
| 4Br-6Br | -8.13                                       | -8.35                                         |
| 4I-6I   | -8.97                                       | -8.98                                         |
| 4F-7F   | -7.32                                       | -7.22                                         |
| 4Cl-7Cl | -7.86                                       | -7.82                                         |
| 4Br-7Br | -8.10                                       | -8.22                                         |
| 4I-7I   | -8.74                                       | -8.83                                         |
| 5F-5F   | -6.06                                       | -6.92                                         |
| 5Cl-5Cl | -8.11                                       | -7.64                                         |
| 5Br-5Br | -8.73                                       | -8.10                                         |
| 5I-5I   | -9.74                                       | -8.80                                         |
| 5F-6F   | -7.11                                       | -6.96                                         |
| 5Cl-6Cl | -7.43                                       | -7.75                                         |
| 5Br-6Br | -7.64                                       | -8.23                                         |
| 5I-6I   | -8.33                                       | -8.92                                         |
| 5F-7F   | -7.28                                       | -6.95                                         |
| 5Cl-7Cl | -7.51                                       | -7.66                                         |
| 5Br-7Br | -7.61                                       | -8.11                                         |
| 5I-7I   | -8.04                                       | -8.77                                         |
| 6F-6F   | -6.84                                       | -7.00                                         |
| 6Cl-6Cl | -7.95                                       | -7.87                                         |
| 6Br-6Br | -8.24                                       | -8.36                                         |
| 6I-6I   | -8.88                                       | -9.04                                         |
| 6F-7F   | -6.88                                       | -6.99                                         |
| 6Cl-7Cl | -8.21                                       | -7.77                                         |
| 6Br-7Br | -8.68                                       | -8.23                                         |
| 6I-7I   | -9.45                                       | -8.89                                         |
| 7F-7F   | -6.77                                       | -6.98                                         |
| 7Cl-7Cl | -7.71                                       | -7.68                                         |
| 7Br-7Br | -7.95                                       | -8.11                                         |
| 7I-7I   | -8.62                                       | -8.74                                         |

**Table S7.** Dimer descriptors are calculated as the sum of the descriptor values of the respective monomers. This table collects the dimer descriptors calculated for the cross-halogenated 3-methylindole dimers and toluene dimers used to test the applicability window of the model. The explicitly calculated interaction energies and predicted energies are also provided in kcal.mol<sup>-1</sup>.

| #                                              | IE (a.u.) | $\alpha$ (a.u.) | $s^0_{\max}$ (a.u.) | $E_{int}^{CP}$<br>(kcal.mol <sup>-1</sup> ) | $E_{int}^{Pred}$<br>(kcal.mol <sup>-1</sup> ) |
|------------------------------------------------|-----------|-----------------|---------------------|---------------------------------------------|-----------------------------------------------|
| <b>Cross-halogenated 3-methylindole dimers</b> |           |                 |                     |                                             |                                               |
| 4I-7Cl                                         | 0.5488    | 260.89          | 2.73E-01            | -8.42                                       | -8.30                                         |
| 5Cl-6F                                         | 0.5579    | 228.56          | 1.92E-01            | -7.25                                       | -7.33                                         |
| 5Cl-7Br                                        | 0.5587    | 249.04          | 1.71E-01            | -7.63                                       | -7.88                                         |
| 6F-6Br                                         | 0.5534    | 237.20          | 1.93E-01            | -8.12                                       | -7.68                                         |
| 4F-6I                                          | 0.5473    | 251.16          | 1.83E-01            | -8.81                                       | -8.25                                         |
| <b>Toluene dimers</b>                          |           |                 |                     |                                             |                                               |
| H-H                                            | 0.6410    | 152.78          | 5.85E-02            | -3.63                                       | -3.11                                         |
| H-oF                                           | 0.6440    | 152.75          | 9.13E-02            | -3.6                                        | -2.96                                         |
| H-mF                                           | 0.6457    | 152.95          | 9.77E-02            | -3.48                                       | -2.91                                         |
| H-pF                                           | 0.6395    | 152.92          | 5.99E-02            | -3.6                                        | -3.16                                         |
| H-oCl                                          | 0.6414    | 165.61          | 8.98E-02            | -3.94                                       | -3.38                                         |
| H-mCl                                          | 0.6416    | 166.45          | 5.62E-02            | -3.95                                       | -3.46                                         |
| H-pCl                                          | 0.6361    | 166.87          | 5.87E-02            | -4.11                                       | -3.63                                         |
| H-oBr                                          | 0.6372    | 172.48          | 9.89E-02            | -4.08                                       | -3.67                                         |
| H-mBr                                          | 0.6366    | 173.53          | 1.17E-01            | -4.21                                       | -3.68                                         |
| H-pBr                                          | 0.6316    | 174.07          | 6.73E-02            | -4.27                                       | -3.93                                         |
| H-oI                                           | 0.6261    | 185.73          | 1.71E-01            | -4.15                                       | -4.22                                         |
| H-mI                                           | 0.6250    | 187.15          | 1.30E-01            | -4.33                                       | -4.36                                         |
| H-pI                                           | 0.6207    | 187.96          | 1.52E-01            | -4.52                                       | -4.47                                         |
| mF-mF                                          | 0.6503    | 153.13          | 1.37E-01            | -4.36                                       | -2.71                                         |
| mF-pF                                          | 0.6441    | 153.10          | 9.91E-02            | -4.12                                       | -2.95                                         |
| mF-oF                                          | 0.6486    | 152.93          | 1.30E-01            | -3.99                                       | -2.76                                         |
| oF-oF                                          | 0.6503    | 153.13          | 1.37E-01            | -3.65                                       | -2.71                                         |
| oF-pF                                          | 0.6461    | 165.79          | 1.29E-01            | -3.86                                       | -3.18                                         |
| pF-pF                                          | 0.6418    | 178.45          | 1.21E-01            | -3.65                                       | -3.65                                         |
| mCl-mCl                                        | 0.6422    | 180.12          | 5.38E-02            | -6.52                                       | -3.81                                         |
| mCl-pCl                                        | 0.6367    | 180.54          | 5.64E-02            | -5.21                                       | -3.97                                         |
| mCl-oCl                                        | 0.6420    | 179.28          | 8.75E-02            | -4.82                                       | -3.73                                         |
| oCl-oCl                                        | 0.6418    | 178.45          | 1.21E-01            | -4.51                                       | -3.65                                         |
| oCl-pCl                                        | 0.6365    | 179.70          | 9.01E-02            | -4.92                                       | -3.90                                         |
| pCl-pCl                                        | 0.6311    | 180.95          | 5.90E-02            | -4.56                                       | -4.14                                         |
| mBr-mBr                                        | 0.6322    | 194.28          | 1.75E-01            | -6.21                                       | -4.26                                         |
| mBr-pBr                                        | 0.6272    | 194.82          | 1.25E-01            | -5.59                                       | -4.51                                         |
| mBr-oBr                                        | 0.6328    | 193.23          | 1.57E-01            | -5.18                                       | -4.24                                         |
| oBr-oBr                                        | 0.6334    | 192.18          | 1.39E-01            | -4.57                                       | -4.23                                         |
| oBr-pBr                                        | 0.6278    | 193.77          | 1.08E-01            | -5.34                                       | -4.49                                         |
| pBr-pBr                                        | 0.6222    | 195.37          | 7.61E-02            | -4.75                                       | -4.76                                         |
| mI-mI                                          | 0.6089    | 221.51          | 2.02E-01            | -6.55                                       | -5.61                                         |
| mI-pI                                          | 0.6046    | 222.33          | 2.23E-01            | -5.85                                       | -5.72                                         |
| mI-oI                                          | 0.6100    | 220.10          | 2.43E-01            | -6.15                                       | -5.47                                         |

|       |        |        |          |       |       |
|-------|--------|--------|----------|-------|-------|
| ol-ol | 0.6111 | 218.69 | 2.84E-01 | -5.36 | -5.33 |
| ol-pl | 0.6057 | 220.92 | 2.64E-01 | -5.72 | -5.58 |
| ol-pl | 0.6003 | 223.15 | 2.45E-01 | -5.42 | -5.83 |

## 4. Cartesian coordinates

### Coordinates of 3-methylindole monomers

Electronic energies are provided at M06/cc-PVTZ(-PP) (and M06/aug-cc-PVTZ(-PP)) level of theory.

All structures are characterized by 0 imaginary frequencies.

|                                                          |             |             |             |                                                            |             |             |             |
|----------------------------------------------------------|-------------|-------------|-------------|------------------------------------------------------------|-------------|-------------|-------------|
| <b>Entry: H</b>                                          |             |             |             | <b>Entry: 4F</b>                                           |             |             |             |
| <i>E</i> <sub>elec</sub> (a.u.): -402.95454 (-402.96157) |             |             |             | <i>E</i> <sub>elec</sub> (a.u.): -502.19948 (-502.20804)   |             |             |             |
| <i>E</i> <sub>elec</sub> N-1 system (a.u.): -402.68100   |             |             |             | <i>E</i> <sub>elec</sub> N-1 system (a.u.): -501.92365     |             |             |             |
| <i>E</i> <sub>elec</sub> N+1 system (a.u.): -402.90337   |             |             |             | <i>E</i> <sub>elec</sub> N+1 system (a.u.): -502.14791     |             |             |             |
| C                                                        | -1.59395100 | -0.22266500 | 0.00000000  | C                                                          | 1.61922100  | 0.03302900  | 0.00000000  |
| C                                                        | -1.82597900 | 1.11682500  | 0.00000100  | C                                                          | 1.90919400  | -1.29514600 | 0.00000000  |
| C                                                        | -0.17209000 | -0.38351800 | 0.00000000  | C                                                          | 0.18965300  | 0.11912900  | 0.00000100  |
| H                                                        | -2.76627800 | 1.64484300  | 0.00000200  | H                                                          | 2.87442700  | -1.77591300 | -0.00000100 |
| N                                                        | -0.63240900 | 1.80545100  | -0.00000100 | N                                                          | 0.75014500  | -2.03920600 | 0.00000000  |
| C                                                        | 0.39965000  | 0.90439000  | 0.00000000  | C                                                          | -0.32486800 | -1.19306800 | 0.00000000  |
| C                                                        | 0.66462200  | -1.49882400 | 0.00000000  | C                                                          | -0.73138000 | 1.16167100  | 0.00000200  |
| H                                                        | -0.53604800 | 2.80258400  | -0.00000100 | H                                                          | 0.69942800  | -3.03984500 | 0.00000000  |
| C                                                        | 1.77392700  | 1.10005000  | 0.00000000  | C                                                          | -1.68830100 | -1.46727400 | 0.00000000  |
| C                                                        | 2.02886400  | -1.30883300 | 0.00000000  | C                                                          | -2.08076700 | 0.92325900  | 0.00000000  |
| H                                                        | 0.24345100  | -2.49761600 | 0.00000000  | H                                                          | -2.05716200 | -2.48470700 | 0.00000000  |
| H                                                        | 2.20195300  | 2.09490100  | -0.00000100 | C                                                          | -2.55126900 | -0.39479000 | -0.00000100 |
| C                                                        | 2.57654600  | -0.02092100 | 0.00000000  | H                                                          | -2.76270500 | 1.76241200  | -0.00000100 |
| H                                                        | 2.69181200  | -2.16433900 | 0.00000000  | H                                                          | -3.61923700 | -0.56798000 | -0.00000200 |
| H                                                        | 3.65254000  | 0.09641500  | 0.00000000  | C                                                          | 2.59404900  | 1.15286700  | 0.00000000  |
| C                                                        | -2.59650000 | -1.31570300 | -0.00000100 | H                                                          | 2.47386700  | 1.79341000  | -0.87576500 |
| H                                                        | -2.48896600 | -1.95874700 | -0.87730900 | H                                                          | 2.47387000  | 1.79340700  | 0.87576800  |
| H                                                        | -2.48896500 | -1.95874900 | 0.87730600  | H                                                          | 3.61643500  | 0.77395800  | -0.00000300 |
| H                                                        | -3.61316900 | -0.92225400 | 0.00000100  | F                                                          | -0.28479200 | 2.42018100  | -0.00000100 |
| <b>Entry: 4Cl</b>                                        |             |             |             | <b>Entry: 4Br</b>                                          |             |             |             |
| <i>E</i> <sub>elec</sub> (a.u.): -862.55901 (-862.56633) |             |             |             | <i>E</i> <sub>elec</sub> (a.u.): -2976.46495 (-2976.47208) |             |             |             |
| <i>E</i> <sub>elec</sub> N-1 system (a.u.): -862.28340   |             |             |             | <i>E</i> <sub>elec</sub> N-1 system (a.u.): -2976.19058    |             |             |             |
| <i>E</i> <sub>elec</sub> N+1 system (a.u.): -862.51998   |             |             |             | <i>E</i> <sub>elec</sub> N+1 system (a.u.): -2976.42869    |             |             |             |
| C                                                        | -0.76023300 | -1.46650600 | 0.00000200  | C                                                          | 0.89340800  | 1.59000200  | 0.00000000  |
| C                                                        | -2.11296500 | -1.32567200 | -0.00000300 | C                                                          | 2.24302400  | 1.75974900  | 0.00000100  |
| C                                                        | -0.22617800 | -0.13559900 | 0.00000300  | C                                                          | 0.67338700  | 0.17109800  | -0.00000100 |
| H                                                        | -2.86902100 | -2.09435600 | -0.00000500 | H                                                          | 2.80370900  | 2.68071400  | 0.00000200  |
| N                                                        | -2.45942200 | 0.00467900  | -0.00000200 | N                                                          | 2.88286000  | 0.54425200  | 0.00000000  |
| C                                                        | -1.32022300 | 0.76040900  | 0.00000100  | C                                                          | 1.94531400  | -0.44995600 | 0.00000000  |
| C                                                        | 1.05043800  | 0.42764900  | 0.00000300  | C                                                          | -0.43831400 | -0.67420100 | -0.00000100 |
| H                                                        | -3.39431400 | 0.36569800  | -0.00000400 | H                                                          | 3.87520700  | 0.40513700  | 0.00000100  |
| C                                                        | -1.16894700 | 2.14048300  | 0.00000100  | C                                                          | 2.11884900  | -1.82674200 | 0.00000000  |
| C                                                        | 1.22238200  | 1.79133000  | 0.00000100  | C                                                          | -0.28678200 | -2.04119000 | 0.00000000  |
| H                                                        | -2.02925300 | 2.79748100  | -0.00000100 | H                                                          | 3.10882600  | -2.26492400 | 0.00000000  |
| C                                                        | 0.11290100  | 2.64094800  | 0.00000000  | C                                                          | 0.98911800  | -2.61153300 | 0.00000000  |
| H                                                        | 2.22441700  | 2.19757800  | -0.00000100 | H                                                          | -1.16352200 | -2.67427500 | 0.00000000  |
| H                                                        | 0.27179800  | 3.71110900  | -0.00000200 | H                                                          | 1.08197800  | -3.68940600 | 0.00000000  |
| C                                                        | -0.03352200 | -2.76321900 | 0.00000200  | C                                                          | -0.09806700 | 2.69798900  | -0.00000100 |
| H                                                        | 0.60754400  | -2.87304800 | -0.87608800 | H                                                          | -0.74799000 | 2.66767700  | -0.87598200 |
| H                                                        | 0.60749200  | -2.87307800 | 0.87612500  | H                                                          | -0.74800600 | 2.66766300  | 0.87596800  |
| H                                                        | -0.74279800 | -3.59190700 | -0.00003200 | H                                                          | 0.41715300  | 3.65957800  | 0.00001100  |
| Cl                                                       | 2.46812800  | -0.59359800 | -0.00000200 | Br                                                         | -2.20134300 | 0.02990800  | 0.00000000  |
| <b>Entry: 4I</b>                                         |             |             |             | <b>Entry: 5F</b>                                           |             |             |             |
| <i>E</i> <sub>elec</sub> (a.u.): -698.12204 (-698.12898) |             |             |             | <i>E</i> <sub>elec</sub> (a.u.): -502.19868 (-502.20763)   |             |             |             |
| <i>E</i> <sub>elec</sub> N-1 system (a.u.): -697.85222   |             |             |             | <i>E</i> <sub>elec</sub> N-1 system (a.u.): -501.91875     |             |             |             |
| <i>E</i> <sub>elec</sub> N+1 system (a.u.): -698.08848   |             |             |             | <i>E</i> <sub>elec</sub> N+1 system (a.u.): -502.15633     |             |             |             |
| C                                                        | 1.29138100  | 1.59519100  | 0.00000100  | C                                                          | -1.79624400 | -0.57168900 | 0.00000000  |
| C                                                        | 2.63858800  | 1.78303500  | -0.00000200 | C                                                          | -2.43429000 | 0.63043400  | 0.00000000  |

|   |             |             |             |
|---|-------------|-------------|-------------|
| C | 1.08616000  | 0.17254900  | 0.00000200  |
| H | 3.18663000  | 2.71160700  | -0.00000300 |
| N | 3.29399100  | 0.57709400  | -0.00000300 |
| C | 2.36951200  | -0.42889800 | -0.00000100 |
| C | -0.01532300 | -0.69123300 | 0.00000500  |
| H | 4.28797700  | 0.44988800  | -0.00000300 |
| C | 2.56904300  | -1.80153200 | -0.00000100 |
| C | 0.16977200  | -2.05670400 | 0.00000300  |
| H | 3.56735700  | -2.22053300 | -0.00000300 |
| C | 1.45422200  | -2.60642800 | 0.00000100  |
| H | -0.68993000 | -2.71280100 | 0.00000400  |
| H | 1.56403700  | -3.68281800 | 0.00000000  |
| C | 0.29276800  | 2.69635300  | 0.00000400  |
| H | -0.35737200 | 2.66255400  | -0.87576900 |
| H | -0.35735200 | 2.66256700  | 0.87579200  |
| H | 0.80292200  | 3.66081800  | -0.00000900 |
| I | -2.00375400 | 0.00858600  | -0.00000100 |

Entry: 5Cl

$E_{\text{elec}}$  (a.u.): -862.55903 (-862.56645)

$E_{\text{elec}}$  N-1 system (a.u.): -862.27842

$E_{\text{elec}}$  N+1 system (a.u.): -862.52238

|    |             |             |             |
|----|-------------|-------------|-------------|
| C  | 2.04356500  | -0.78783300 | 0.00000000  |
| C  | 2.88545200  | 0.28026000  | -0.00000100 |
| C  | 0.71898300  | -0.24977600 | 0.00000000  |
| H  | 3.96351000  | 0.29574600  | -0.00000100 |
| N  | 2.16582200  | 1.45436200  | 0.00000000  |
| C  | 0.82929900  | 1.15482800  | 0.00000000  |
| C  | -0.54358900 | -0.84072900 | 0.00000000  |
| H  | 2.55762400  | 2.37664300  | 0.00000000  |
| C  | -0.28801400 | 1.97759800  | 0.00000000  |
| C  | -1.63999700 | -0.01304000 | 0.00000000  |
| H  | -0.19716400 | 3.05631300  | 0.00000000  |
| C  | -1.52925800 | 1.37941700  | 0.00000000  |
| H  | -2.42922900 | 1.97833500  | 0.00000000  |
| C  | 2.39937800  | -2.22761600 | 0.00000000  |
| H  | 1.99562400  | -2.73914900 | 0.87741500  |
| H  | 1.99562400  | -2.73914900 | -0.87741500 |
| H  | 3.47981700  | -2.37040800 | 0.00000100  |
| Cl | -3.24216500 | -0.71536200 | 0.00000000  |
| H  | -0.66466400 | -1.91636200 | 0.00000000  |

Entry: 5I

$E_{\text{elec}}$  (a.u.): -698.12326 (-698.13015)

$E_{\text{elec}}$  N-1 system (a.u.): -697.84797

$E_{\text{elec}}$  N+1 system (a.u.): -698.08993

|   |             |             |             |
|---|-------------|-------------|-------------|
| C | 3.04092700  | -0.95646800 | 0.00000000  |
| C | 4.02559600  | -0.01897600 | -0.00000400 |
| C | 1.80554000  | -0.23568400 | 0.00000000  |
| H | 5.09510200  | -0.15604500 | -0.00000600 |
| N | 3.47967100  | 1.24588300  | -0.00000100 |
| C | 2.11511800  | 1.13928600  | -0.00000100 |
| C | 0.47085800  | -0.63878800 | 0.00000100  |
| H | 3.99829700  | 2.10327100  | -0.00000300 |
| C | 1.12699000  | 2.11330300  | 0.00000000  |
| C | -0.50262200 | 0.33448700  | 0.00000800  |
| H | 1.37083200  | 3.16822200  | 0.00000100  |
| C | -0.18723700 | 1.69784100  | 0.00000200  |
| H | -0.98302700 | 2.43010300  | 0.00000800  |
| C | 3.19042800  | -2.43195700 | 0.00000200  |
| H | 2.71930600  | -2.88220800 | 0.87743600  |
| H | 2.71930500  | -2.88221000 | -0.87743100 |
| H | 4.24010800  | -2.72526000 | 0.00000200  |
| I | -2.53286800 | -0.22839800 | -0.00000100 |
| H | 0.21079400  | -1.69024600 | 0.00000600  |

Entry: 6Cl

$E_{\text{elec}}$  (a.u.): -862.55914 (-862.56656)

$E_{\text{elec}}$  N-1 system (a.u.): -862.28178

$E_{\text{elec}}$  N+1 system (a.u.): -862.52203

|   |             |             |             |
|---|-------------|-------------|-------------|
| C | -0.39682900 | -0.28087300 | 0.00000000  |
| H | -3.49302600 | 0.83573300  | 0.00000000  |
| N | -1.51911300 | 1.65620000  | 0.00000000  |
| C | -0.25552800 | 1.12135000  | 0.00000000  |
| C | 0.74365400  | -1.08582200 | 0.00000100  |
| H | -1.73883500 | 2.63361800  | 0.00000000  |
| C | 0.98829300  | 1.73567700  | 0.00000000  |
| C | 1.96147700  | -0.45756900 | 0.00000000  |
| H | 1.08616400  | 2.81380600  | 0.00000000  |
| C | 2.10523300  | 0.92844500  | 0.00000000  |
| H | 3.10280300  | 1.34578900  | 0.00000000  |
| C | -2.41133600 | -1.92120600 | 0.00000000  |
| H | -2.11165400 | -2.49989800 | -0.87753700 |
| H | -2.11165100 | -2.49989900 | 0.87753500  |
| H | -3.49962100 | -1.86005100 | 0.00000100  |
| F | 3.07592400  | -1.19866800 | 0.00000000  |
| H | 0.68971100  | -2.16697600 | 0.00000000  |

Entry: 5Br

$E_{\text{elec}}$  (a.u.): -2976.46550 (-2976.47266)

$E_{\text{elec}}$  N-1 system (a.u.): -2976.18586

$E_{\text{elec}}$  N+1 system (a.u.): -2976.43060

|    |             |             |             |
|----|-------------|-------------|-------------|
| C  | 2.57422100  | -0.90218800 | 0.00000000  |
| C  | 3.51767600  | 0.07705100  | -0.00000100 |
| C  | 1.30936500  | -0.23556000 | 0.00000000  |
| H  | 4.59203400  | -0.01383800 | -0.00000100 |
| N  | 2.91758600  | 1.31680500  | 0.00000000  |
| C  | 1.55847100  | 1.15124500  | 0.00000000  |
| C  | -0.00593400 | -0.69735600 | 0.00000000  |
| H  | 3.39838000  | 2.19597400  | 0.00000000  |
| C  | 0.52860500  | 2.08140000  | 0.00000000  |
| C  | -1.01619100 | 0.23485100  | 0.00000000  |
| H  | 0.72662100  | 3.14578500  | 0.00000000  |
| C  | -0.76645700 | 1.60971500  | 0.00000000  |
| H  | -1.59911000 | 2.29954400  | 0.00000000  |
| C  | 2.78438800  | -2.37010800 | 0.00000000  |
| H  | 2.33149700  | -2.83894600 | 0.87732200  |
| H  | 2.33149700  | -2.83894600 | -0.87732100 |
| H  | 3.84500100  | -2.62098400 | 0.00000000  |
| Br | -2.82074900 | -0.35666900 | 0.00000000  |
| H  | -0.22767200 | -1.75712300 | 0.00000000  |

Entry: 6F

$E_{\text{elec}}$  (a.u.): -502.19913 (-502.20805)

$E_{\text{elec}}$  N-1 system (a.u.): -501.92186

$E_{\text{elec}}$  N+1 system (a.u.): -502.15308

|   |             |             |             |
|---|-------------|-------------|-------------|
| C | -1.99788400 | -0.20428300 | 0.00000000  |
| C | -2.21043900 | 1.13688100  | 0.00000100  |
| C | -0.57742700 | -0.38612600 | 0.00000000  |
| H | -3.14135000 | 1.68067100  | 0.00000200  |
| N | -1.00316900 | 1.80817100  | -0.00000100 |
| C | 0.01263400  | 0.89405700  | 0.00000000  |
| C | 0.24200000  | -1.51277000 | 0.00000100  |
| H | -0.89187500 | 2.80381500  | -0.00000100 |
| C | 1.39009000  | 1.07458300  | 0.00000000  |
| C | 1.60983800  | -1.35254700 | 0.00000000  |
| H | 1.86330100  | 2.04708200  | 0.00000000  |
| C | 2.15023700  | -0.06871500 | 0.00000000  |
| C | -3.01458800 | -1.28386800 | -0.00000100 |
| H | -2.91546800 | -1.92800900 | -0.87744800 |
| H | -2.91546700 | -1.92801000 | 0.87744500  |
| H | -4.02573000 | -0.87688300 | 0.00000000  |
| H | -0.19257800 | -2.50527900 | 0.00000100  |
| H | 2.28414600  | -2.19781400 | 0.00000000  |
| F | 3.48115900  | 0.05155200  | -0.00000100 |

Entry: 6Br

$E_{\text{elec}}$  (a.u.): -2976.46552 (-2976.47268)

$E_{\text{elec}}$  N-1 system (a.u.): -2976.18939

$E_{\text{elec}}$  N+1 system (a.u.): -2976.43078

|    |             |             |             |
|----|-------------|-------------|-------------|
| C  | -2.40605500 | -0.19030200 | 0.00000000  |
| C  | -2.60204500 | 1.15452400  | 0.00000100  |
| C  | -0.98920600 | -0.38785600 | 0.00000000  |
| H  | -3.52701700 | 1.70854000  | 0.00000100  |
| N  | -1.38936200 | 1.81177800  | 0.00000000  |
| C  | -0.38365300 | 0.88487300  | 0.00000000  |
| C  | -0.18206900 | -1.52339100 | 0.00000000  |
| H  | -1.26691300 | 2.80622100  | 0.00000000  |
| C  | 0.99468200  | 1.04893100  | 0.00000000  |
| C  | 1.18694700  | -1.37883300 | 0.00000000  |
| H  | 1.46633400  | 2.02225600  | 0.00000000  |
| C  | 1.75057900  | -0.10084500 | 0.00000000  |
| C  | -3.43570900 | -1.25766100 | 0.00000000  |
| H  | -3.34419600 | -1.90281700 | -0.87744300 |
| H  | -3.34419600 | -1.90281700 | 0.87744300  |
| H  | -4.44191000 | -0.83877000 | 0.00000000  |
| H  | -0.62584000 | -2.51188900 | 0.00000000  |
| H  | 1.84033500  | -2.24002400 | 0.00000000  |
| Cl | 3.49224200  | 0.04001300  | 0.00000000  |

Entry: 6I

$E_{\text{elec}}$  (a.u.): -698.12327 (-698.13016)

$E_{\text{elec}}$  N-1 system (a.u.): -697.85180

$E_{\text{elec}}$  N+1 system (a.u.): -698.09080

|   |             |             |             |
|---|-------------|-------------|-------------|
| C | -3.59687000 | -0.17591300 | -0.00000100 |
| C | -3.77698400 | 1.17164800  | 0.00000000  |
| C | -2.18289500 | -0.38947900 | 0.00000000  |
| H | -4.69597900 | 1.73565300  | 0.00000000  |
| N | -2.55794700 | 1.81486100  | 0.00000000  |
| C | -1.56228300 | 0.87594100  | 0.00000100  |
| C | -1.38786300 | -1.53355400 | 0.00000100  |
| H | -2.42403100 | 2.80787900  | 0.00000100  |
| C | -0.18202900 | 1.02471000  | 0.00000100  |
| C | -0.01677600 | -1.40303300 | 0.00000200  |
| H | 0.28504700  | 2.00113800  | 0.00000300  |
| C | 0.56832400  | -0.13165600 | 0.00000400  |
| C | -4.63923600 | -1.23104200 | -0.00000200 |
| H | -4.55537500 | -1.87719500 | -0.87745000 |
| H | -4.55537400 | -1.87719800 | 0.87744300  |
| H | -5.64043100 | -0.80030700 | -0.00000100 |
| H | -1.84124900 | -2.51790100 | 0.00000100  |
| H | 0.61603700  | -2.28027400 | 0.00000500  |
| I | 2.66748400  | 0.01619700  | -0.00000100 |

Entry: 7Cl

$E_{\text{elec}}$  (a.u.): -862.56091 (-862.56846)

$E_{\text{elec}}$  N-1 system (a.u.): -862.28194

$E_{\text{elec}}$  N+1 system (a.u.): -862.52300

|    |             |             |             |
|----|-------------|-------------|-------------|
| C  | 2.13020000  | -0.42500000 | 0.00000000  |
| C  | 1.63826600  | -1.69292100 | 0.00000000  |
| C  | 0.99605500  | 0.44789700  | 0.00000000  |
| H  | 2.17081300  | -2.63039500 | 0.00000000  |
| N  | 0.26056900  | -1.67014400 | 0.00000000  |
| C  | -0.15077800 | -0.37043400 | 0.00000000  |
| C  | 0.84741200  | 1.83427100  | 0.00000000  |
| H  | -0.35061300 | -2.46548300 | 0.00000100  |
| C  | -1.42029100 | 0.18417900  | 0.00000000  |
| C  | -0.42175200 | 2.36926900  | 0.00000000  |
| C  | -1.55737300 | 1.55167300  | 0.00000000  |
| C  | 3.55288500  | -0.00536900 | 0.00000000  |
| H  | 3.79211600  | 0.60074900  | -0.87748900 |
| H  | 3.79211700  | 0.60074600  | 0.87749100  |
| H  | 4.22104100  | -0.86654100 | -0.00000200 |
| H  | 1.71817600  | 2.47881300  | 0.00000000  |
| H  | -0.55515100 | 3.44298100  | 0.00000000  |
| Cl | -2.80892800 | -0.87152200 | 0.00000000  |
| H  | -2.54844200 | 1.98463100  | 0.00000000  |

|    |             |             |             |
|----|-------------|-------------|-------------|
| C  | -3.06242800 | -0.18208500 | 0.00000000  |
| C  | -3.24913400 | 1.16434200  | 0.00000100  |
| C  | -1.64716800 | -0.38911400 | 0.00000000  |
| H  | -4.17058900 | 1.72422400  | 0.00000200  |
| N  | -2.03261700 | 1.81334700  | -0.00000100 |
| C  | -1.03313900 | 0.87943000  | 0.00000000  |
| C  | -0.84745100 | -1.52994500 | 0.00000000  |
| H  | -1.90323200 | 2.80694500  | -0.00000100 |
| C  | 0.34640000  | 1.03419200  | 0.00000000  |
| C  | 0.52299800  | -1.39437600 | 0.00000000  |
| H  | 0.81873900  | 2.00731500  | -0.00000100 |
| C  | 1.09610600  | -0.12006400 | 0.00000000  |
| C  | -4.10051800 | -1.24124900 | -0.00000100 |
| H  | -4.01444100 | -1.88709100 | -0.87745900 |
| H  | -4.01444000 | -1.88709300 | 0.87745600  |
| H  | -5.10320500 | -0.81398500 | 0.00000100  |
| H  | -1.29747100 | -2.51569300 | 0.00000000  |
| H  | 1.16591600  | -2.26376500 | 0.00000100  |
| Br | 2.98837300  | 0.02311200  | 0.00000000  |

Entry: 7F

$E_{\text{elec}}$  (a.u.): -502.19809 (-502.20714)

$E_{\text{elec}}$  N-1 system (a.u.): -501.91984

$E_{\text{elec}}$  N+1 system (a.u.): -502.14748

|   |             |             |             |
|---|-------------|-------------|-------------|
| C | 1.87994500  | -0.10169500 | 0.00000000  |
| C | 1.70463000  | -1.45088900 | 0.00000100  |
| C | 0.57147400  | 0.47764300  | 0.00000000  |
| H | 2.44660400  | -2.23315400 | 0.00000200  |
| N | 0.36157400  | -1.75739900 | 0.00000000  |
| C | -0.34505800 | -0.58826800 | 0.00000000  |
| C | 0.09939300  | 1.79221300  | 0.00000000  |
| H | -0.03850800 | -2.67631600 | 0.00000000  |
| C | -1.70756600 | -0.34408500 | 0.00000000  |
| C | -1.25934500 | 2.01040700  | 0.00000000  |
| C | -2.16997700 | 0.94488300  | 0.00000000  |
| C | 3.15959900  | 0.64844000  | -0.00000100 |
| H | 3.24324800  | 1.29473800  | -0.87734500 |
| H | 3.24324900  | 1.29473900  | 0.87734300  |
| H | 4.01693200  | -0.02451400 | -0.00000100 |
| H | 0.79347100  | 2.62368500  | 0.00000000  |
| H | -1.64361200 | 3.02178800  | 0.00000000  |
| F | -2.55039100 | -1.38325100 | 0.00000000  |
| H | -3.23746200 | 1.11818100  | 0.00000000  |

Entry: 7Br

$E_{\text{elec}}$  (a.u.): -2976.46775 (-2976.47503)

$E_{\text{elec}}$  N-1 system (a.u.): -2976.18967

$E_{\text{elec}}$  N+1 system (a.u.): -2976.43248

|    |             |             |             |
|----|-------------|-------------|-------------|
| C  | 2.59711600  | -0.62122900 | 0.00000000  |
| C  | 1.92983200  | -1.80607800 | -0.00000100 |
| C  | 1.59835400  | 0.40358600  | 0.00000000  |
| H  | 2.32514900  | -2.80913600 | -0.00000100 |
| N  | 0.56972400  | -1.58814600 | 0.00000000  |
| C  | 0.34527800  | -0.24291900 | 0.00000000  |
| C  | 1.64797700  | 1.79668300  | 0.00000000  |
| H  | -0.14820100 | -2.28908700 | 0.00000100  |
| C  | -0.83244600 | 0.48640100  | 0.00000000  |
| C  | 0.46850700  | 2.50825300  | 0.00000000  |
| C  | -0.77175700 | 1.86031500  | 0.00000000  |
| C  | 4.06526200  | -0.40969000 | 0.00000000  |
| H  | 4.38889500  | 0.15547000  | -0.87764700 |
| H  | 4.38889500  | 0.15547100  | 0.87764700  |
| H  | 4.60223000  | -1.35822900 | 0.00000200  |
| H  | 2.60214200  | 2.31000200  | 0.00000000  |
| H  | 0.48962000  | 3.58991700  | 0.00000000  |
| Br | -2.49251200 | -0.42641900 | 0.00000000  |
| H  | -1.68763000 | 2.43534000  | 0.00000000  |

Entry: 71

$E_{\text{elec}}$  (a.u.): -698.12601 (-698.13303)

$E_{\text{elec}}$  N-1 system (a.u.): -697.85127

$E_{\text{elec}}$  N+1 system (a.u.): -698.09318

|   |             |             |             |
|---|-------------|-------------|-------------|
| C | 3.00608900  | -0.71972500 | 0.00000000  |
| C | 2.26257000  | -1.85817700 | 0.00000000  |
| C | 2.07622400  | 0.36735700  | 0.00000000  |
| H | 2.59037000  | -2.88521300 | 0.00000100  |
| N | 0.92010800  | -1.55051600 | -0.00000100 |
| C | 0.78069000  | -0.19318000 | -0.00000100 |
| C | 2.22223900  | 1.75275000  | 0.00000000  |
| H | 0.15920400  | -2.20562200 | -0.00000100 |
| C | -0.34923200 | 0.61235700  | -0.00000100 |
| C | 1.09414600  | 2.54297400  | 0.00000000  |
| C | -0.18718200 | 1.98078900  | 0.00000000  |
| C | 4.48471300  | -0.60163800 | 0.00000000  |
| H | 4.84305700  | -0.05793300 | -0.87772600 |
| H | 4.84305600  | -0.05793300 | 0.87772700  |
| H | 4.96086100  | -1.58208400 | 0.00000100  |
| H | 3.21001400  | 2.19817600  | 0.00000100  |
| H | 1.18820900  | 3.62094900  | 0.00000000  |
| I | -2.25510500 | -0.26609400 | 0.00000000  |
| H | -1.05650200 | 2.62519500  | 0.00000000  |

#### Coordinates of 3-methylindole dimers

Counterpoise corrected electronic energies are provided at M06/aug-cc-PVTZ(-PP) level of theory.

All structures are characterized by 0 imaginary frequencies

Entry: H-H

$E^{\text{CP}}$  (a.u.): -805.93529

|   |             |             |             |
|---|-------------|-------------|-------------|
| C | 0.42116500  | -0.90049200 | 1.95956800  |
| C | 1.35945200  | 0.83106400  | 0.91060700  |
| H | -0.28107200 | -1.39294700 | 2.61397500  |
| C | 1.99162300  | -0.35099600 | 0.47409500  |
| C | 1.70653300  | 2.07666700  | 0.40536300  |
| C | 2.98893500  | -0.27395200 | -0.49631500 |
| C | 2.68985200  | 2.12432400  | -0.56278400 |
| H | 1.21800400  | 2.97846800  | 0.75426600  |
| H | 3.48414700  | -1.17418500 | -0.84277500 |
| C | 3.32646000  | 0.95990800  | -1.01146700 |
| H | 2.98403800  | 3.08133300  | -0.97486900 |
| H | 4.09975400  | 1.03738100  | -1.76497000 |
| C | -1.37476100 | -1.44433600 | -1.15696200 |
| C | -0.42180000 | -0.90111800 | -1.95958400 |
| C | -1.99164400 | -0.35051100 | -0.47387000 |
| H | 0.28012700  | -1.39408700 | -2.61393900 |
| N | -0.41993000 | 0.47151000  | -1.83932300 |
| C | -1.35884900 | 0.83115000  | -0.91065400 |
| C | -2.98903700 | -0.27274900 | 0.49639600  |
| H | 0.30590700  | 1.07506700  | -2.18311600 |
| C | -1.70544600 | 2.07703600  | -0.40574200 |
| C | -3.32603500 | 0.96139700  | 1.01120900  |
| H | -1.21656200 | 2.97856000  | -0.75485400 |
| C | -2.68881500 | 2.12538200  | 0.56230600  |
| H | -4.09934700 | 1.03945200  | 1.76462900  |
| H | -2.98258200 | 3.08264600  | 0.97410500  |
| C | -1.69469300 | -2.87792100 | -0.95851900 |
| H | -1.48934000 | -3.18173300 | 0.07367200  |
| H | -2.74964300 | -3.09017000 | -1.14994800 |
| H | -1.10170700 | -3.51509700 | -1.61540800 |
| H | -3.48472500 | -1.17265800 | 0.84305800  |
| C | 1.37393800  | -1.44437600 | 1.15721400  |
| C | 1.69320600  | -2.87813300 | 0.95912700  |
| H | 1.48725400  | -3.18220500 | -0.07287000 |
| H | 2.74811100  | -3.09075300 | 1.15029400  |
| H | 1.10017600  | -3.51485000 | 1.61645600  |
| N | 0.42028800  | 0.47214800  | 1.83931700  |
| H | -0.30556200 | 1.07611300  | 2.18240100  |

Entry: H-4Cl

$E^{\text{CP}}$  (a.u.): -1265.54061

Entry: H-4F

$E^{\text{CP}}$  (a.u.): -905.18169

|   |             |             |             |
|---|-------------|-------------|-------------|
| C | 0.27416100  | 0.94383300  | -1.90657400 |
| C | 1.52826700  | -0.66825100 | -1.00739500 |
| H | -0.53624000 | 1.35369400  | -2.48972400 |
| C | 2.01169100  | 0.57621100  | -0.55626100 |
| C | 2.08932200  | -1.86735900 | -0.58913700 |
| C | 3.08112100  | 0.61107700  | 0.33684700  |
| C | 3.13666900  | -1.80548300 | 0.30778900  |
| H | 1.71732200  | -2.81746800 | -0.95296600 |
| H | 3.46742800  | 1.56075400  | 0.68969100  |
| C | 3.62916000  | -0.57791000 | 0.76907400  |
| H | 3.59739100  | -2.72352700 | 0.65042800  |
| H | 4.45965800  | -0.56891800 | 1.46329100  |
| C | -1.14733500 | 1.10394700  | 1.43511500  |
| C | -0.15753800 | 0.55030900  | 2.18442800  |
| C | -1.70078600 | 0.02888000  | 0.67054800  |
| H | 0.51634400  | 1.02969000  | 2.87648400  |
| N | -0.07475900 | -0.80445900 | 1.94983000  |
| C | -1.00064900 | -1.14776200 | 1.00524700  |
| C | -2.68661100 | -0.07123100 | -0.30288600 |
| H | 0.68584300  | -1.39176300 | 2.24160200  |
| C | -1.26911600 | -2.37512600 | 0.40798500  |
| C | -2.96725200 | -1.26397200 | -0.91957900 |
| H | -0.72055300 | -3.26543100 | 0.68743700  |
| C | -2.25420100 | -2.41402100 | -0.55491400 |
| H | -3.74531200 | -1.30006700 | -1.66976400 |
| H | -2.49370000 | -3.35276300 | -1.03731900 |
| C | -1.53587100 | 2.53501600  | 1.37629700  |
| H | -1.38435800 | 2.93786700  | 0.37021000  |
| H | -2.58960500 | 2.68365500  | 1.61985000  |
| H | -0.93968600 | 3.12927200  | 2.06989600  |
| F | -3.35627700 | 1.02834800  | -0.66144300 |
| H | -0.18364200 | -1.10791400 | -2.15693800 |
| N | 0.48275100  | -0.41775800 | -1.85603100 |
| C | 1.19650600  | 1.59178000  | -1.14688000 |
| C | 1.33535900  | 3.05083500  | -0.92472900 |
| H | 1.23589100  | 3.29734000  | 0.13739300  |
| H | 2.31304100  | 3.41970700  | -1.24576300 |
| H | 0.57334200  | 3.61161600  | -1.46726600 |

Entry: H-4Br

$E^{\text{CP}}$  (a.u.): -3379.44646

|    |             |             |             |
|----|-------------|-------------|-------------|
| C  | 0.27918900  | 1.01166700  | -1.83860300 |
| C  | 1.74953800  | -0.48650600 | -1.07980900 |
| H  | -0.60727500 | 1.34884900  | -2.35367900 |
| C  | 2.11866500  | 0.78507500  | -0.59696600 |
| C  | 2.45159200  | -1.63319300 | -0.73448200 |
| C  | 3.22119900  | 0.90175300  | 0.24754900  |
| C  | 3.52942000  | -1.49256500 | 0.11686500  |
| H  | 2.16025400  | -2.60414000 | -1.11680800 |
| H  | 3.52070000  | 1.87329500  | 0.62425600  |
| C  | 3.91293800  | -0.23665300 | 0.60434900  |
| H  | 4.09965200  | -2.36793900 | 0.40146400  |
| H  | 4.77064300  | -0.16384400 | 1.26064200  |
| C  | -0.98465700 | 0.83872100  | 1.56123200  |
| C  | 0.11196100  | 0.38098500  | 2.22226400  |
| C  | -1.45596300 | -0.26394900 | 0.77519800  |
| H  | 0.76511700  | 0.91717500  | 2.89244400  |
| N  | 0.34198400  | -0.94179800 | 1.92846900  |
| C  | -0.59218500 | -1.35656500 | 1.02208600  |
| C  | -2.48077400 | -0.46704700 | -0.14823700 |
| H  | 1.20226500  | -1.42804300 | 2.11317000  |
| C  | -0.73341800 | -2.58888500 | 0.39925900  |
| C  | -2.63404600 | -1.67734600 | -0.78493100 |
| H  | -0.05409900 | -3.40301700 | 0.61828300  |
| C  | -1.76085300 | -2.73440900 | -0.50696100 |
| H  | -3.44069400 | -1.80394200 | -1.49395900 |
| H  | -1.90709000 | -3.68185500 | -1.00908500 |
| C  | -1.52559200 | 2.21973300  | 1.64522800  |
| H  | -1.49650700 | 2.72171900  | 0.67505700  |
| H  | -2.56383900 | 2.23885300  | 1.98072100  |
| H  | -0.93557900 | 2.81375800  | 2.34519700  |
| H  | 0.03261900  | -1.06458600 | -2.15948100 |
| N  | 0.63883200  | -0.31905700 | -1.86340500 |
| C  | 1.16558800  | 1.72651300  | -1.09620100 |
| C  | 1.14200100  | 3.17629400  | -0.78810400 |
| H  | 1.03343100  | 3.34005700  | 0.28957900  |
| H  | 2.06466300  | 3.67471500  | -1.09597400 |
| H  | 0.31017000  | 3.67725300  | -1.28451900 |
| Cl | -3.58280900 | 0.83034900  | -0.54477500 |

Entry: H-4I

$E^{\text{CP}}$  (a.u.): -1101.10396

|   |             |             |             |
|---|-------------|-------------|-------------|
| C | -0.73253300 | -0.97522200 | -1.80003300 |
| C | -2.49580200 | 0.24620600  | -1.18249100 |
| H | 0.22254000  | -1.16167100 | -2.26638300 |
| C | -2.64575300 | -1.05244800 | -0.65476200 |
| C | -3.42085900 | 1.25040600  | -0.93186400 |
| C | -3.75221900 | -1.34293400 | 0.14132500  |
| C | -4.50049700 | 0.94031800  | -0.12893200 |
| H | -3.29796100 | 2.24259400  | -1.34921800 |
| H | -3.88347800 | -2.33782400 | 0.55200900  |
| C | -4.66657800 | -0.34476900 | 0.40361200  |
| H | -5.24276500 | 1.70038200  | 0.08021800  |
| H | -5.53238400 | -0.55398700 | 1.01874300  |
| C | 0.18413300  | -0.52021300 | 1.75812800  |
| C | -1.03054500 | -0.23536300 | 2.29925400  |
| C | 0.52997000  | 0.60941500  | 0.94076400  |
| H | -1.63894600 | -0.85046300 | 2.94334400  |
| N | -1.45888300 | 1.00885400  | 1.90943500  |
| C | -0.53405900 | 1.53948000  | 1.05641900  |
| C | 1.57937700  | 0.95514000  | 0.08286000  |
| H | -2.40349600 | 1.34285500  | 1.99372200  |
| C | -0.56367100 | 2.75007100  | 0.38057500  |
| C | 1.55304400  | 2.14706500  | -0.61144400 |
| H | -1.39266100 | 3.43501700  | 0.50750100  |
| C | 0.48723600  | 3.04016100  | -0.45959000 |
| H | 2.37166800  | 2.40202800  | -1.27151700 |
| H | 0.50309900  | 3.97516800  | -1.00466700 |
| C | 0.93148700  | -1.78345200 | 1.98961000  |
| H | 1.11099500  | -2.32385800 | 1.05737300  |
| H | 1.90675700  | -1.61388600 | 2.44965300  |

|    |             |             |             |
|----|-------------|-------------|-------------|
| C  | -0.46819600 | -0.96244600 | -1.85255900 |
| C  | -2.13706300 | 0.34909400  | -1.16267300 |
| H  | 0.46206800  | -1.19621400 | -2.34698700 |
| C  | -2.34831300 | -0.94708900 | -0.65081500 |
| C  | -2.99095700 | 1.40308300  | -0.86752700 |
| C  | -3.44350500 | -1.18226400 | 0.17915200  |
| C  | -4.06037100 | 1.14633600  | -0.03336000 |
| H  | -2.81645200 | 2.39400400  | -1.26937800 |
| H  | -3.62108500 | -2.17357600 | 0.58108500  |
| C  | -4.28636100 | -0.13517600 | 0.48640700  |
| H  | -4.74649400 | 1.94671100  | 0.21366600  |
| H  | -5.14157100 | -0.30135700 | 1.12892100  |
| C  | 0.61074700  | -0.70317900 | 1.67830100  |
| C  | -0.57452900 | -0.41439500 | 2.27941400  |
| C  | 0.95489300  | 0.45779300  | 0.90877400  |
| H  | -1.17449400 | -1.04404200 | 2.91738000  |
| N  | -0.98349700 | 0.85791100  | 1.96485800  |
| C  | -0.07463600 | 1.40953400  | 1.10801200  |
| C  | 1.97812800  | 0.81527700  | 0.02900500  |
| H  | -1.90837700 | 1.21882100  | 2.12113500  |
| C  | -0.08672200 | 2.65424000  | 0.49448300  |
| C  | 1.97598400  | 2.03864200  | -0.60215700 |
| H  | -0.88898700 | 3.35674900  | 0.68161100  |
| C  | 0.94635600  | 2.95520400  | -0.36444300 |
| H  | 2.78245300  | 2.29100300  | -1.27726800 |
| H  | 0.97471000  | 3.91711300  | -0.85973900 |
| C  | 1.33849900  | -1.99199800 | 1.80907900  |
| H  | 1.48195700  | -2.47518300 | 0.84016800  |
| H  | 2.32942000  | -1.86697800 | 2.24957500  |
| H  | 0.77406100  | -2.67733000 | 2.44392200  |
| H  | -0.49415500 | 1.11815800  | -2.23965700 |
| N  | -0.99579300 | 0.30905600  | -1.91787900 |
| C  | -1.26968600 | -1.76821500 | -1.10620900 |
| C  | -1.06790800 | -3.19831800 | -0.77240100 |
| H  | -1.00385900 | -3.34021600 | 0.31149200  |
| H  | -1.89341000 | -3.82114000 | -1.12660000 |
| H  | -0.14630200 | -3.58326200 | -1.21055000 |
| Br | 3.39735400  | -0.38539300 | -0.36715800 |

Entry: H-5F

$E^{\text{CP}}$  (a.u.): -905.18109

|   |             |             |             |
|---|-------------|-------------|-------------|
| C | 0.55767400  | 0.79563000  | -2.02576200 |
| C | 1.36890900  | -0.99001700 | -0.96057300 |
| H | -0.12798500 | 1.34039500  | -2.65561800 |
| C | 2.16970600  | 0.12407300  | -0.63682400 |
| C | 1.60858300  | -2.24717600 | -0.42337500 |
| C | 3.22831400  | -0.03383000 | 0.25587700  |
| C | 2.65618400  | -2.37416100 | 0.46657200  |
| H | 0.98992400  | -3.09638300 | -0.68744600 |
| H | 3.85463900  | 0.81219300  | 0.51605700  |
| C | 3.45937400  | -1.27729200 | 0.80570800  |
| H | 2.87007900  | -3.34231400 | 0.90141200  |
| H | 4.27834200  | -1.41658900 | 1.49968800  |
| C | -0.79518600 | 1.69991500  | 1.26674500  |
| C | 0.19135800  | 1.10076000  | 1.98772100  |
| C | -1.60161200 | 0.64400500  | 0.74313000  |
| H | 1.01600400  | 1.55338800  | 2.51611000  |
| N | 0.03793500  | -0.26532200 | 1.97108000  |
| C | -1.04330400 | -0.57214700 | 1.18577100  |
| C | -2.72548700 | 0.62805500  | -0.08418200 |
| H | 0.74449800  | -0.92303100 | 2.25167600  |
| C | -1.57829000 | -1.79840800 | 0.82158100  |
| C | -3.23039000 | -0.59620100 | -0.44063700 |
| H | -1.14323100 | -2.72662800 | 1.17056000  |
| C | -2.68099700 | -1.80277800 | -0.00879400 |
| H | -3.14619000 | -2.72700000 | -0.32415600 |
| C | -0.99054300 | 3.14680600  | 1.01048100  |
| H | -0.86791900 | 3.37358900  | -0.05411700 |
| H | -1.99209200 | 3.47912300  | 1.29502600  |
| H | -0.27012100 | 3.75101100  | 1.56260200  |

|   |             |             |             |
|---|-------------|-------------|-------------|
| H | 0.36030000  | -2.43805600 | 2.65038900  |
| H | -0.86597600 | 1.09219100  | -2.22460200 |
| N | -1.33159700 | 0.26138700  | -1.90330300 |
| C | -1.50622700 | -1.81454800 | -1.06166200 |
| C | -1.23094600 | -3.22496100 | -0.69764000 |
| H | -1.22147600 | -3.35133000 | 0.38995800  |
| H | -1.99097200 | -3.90554300 | -1.09026300 |
| H | -0.26203400 | -3.55196700 | -1.07732700 |
| I | 3.23918500  | -0.30376300 | -0.23672900 |

Entry: H-5Cl

$E^{\text{CP}}$  (a.u.): -1265.54015

|    |             |             |             |
|----|-------------|-------------|-------------|
| C  | -0.69530800 | 0.73547400  | 2.05827300  |
| C  | -1.45141800 | -1.08078000 | 1.00507300  |
| H  | -0.00770600 | 1.31477400  | 2.65444200  |
| C  | -2.35105500 | -0.02127800 | 0.76849100  |
| C  | -1.63726000 | -2.33973900 | 0.45097100  |
| C  | -3.45532300 | -0.23657400 | -0.05445400 |
| C  | -2.73098300 | -2.52272100 | -0.37061600 |
| H  | -0.94317000 | -3.14712100 | 0.65032800  |
| H  | -4.15944300 | 0.56540300  | -0.24629400 |
| C  | -3.63217700 | -1.47988200 | -0.62431700 |
| H  | -2.90480500 | -3.49384000 | -0.81658500 |
| H  | -4.48564600 | -1.66342800 | -1.26440400 |
| C  | 0.29580900  | 1.83720000  | -1.30744000 |
| C  | -0.72013600 | 1.22090900  | -1.96922600 |
| C  | 1.20309200  | 0.80226800  | -0.92344500 |
| H  | -1.61454300 | 1.65020600  | -2.39335200 |
| N  | -0.49103900 | -0.13364500 | -2.04851800 |
| C  | 0.67370400  | -0.41814000 | -1.38862000 |
| C  | 2.39546500  | 0.80598800  | -0.20077800 |
| H  | -1.18186200 | -0.81585200 | -2.30938000 |
| C  | 1.30676200  | -1.62870700 | -1.15025200 |
| C  | 3.00456400  | -0.40343600 | 0.03756500  |
| H  | 0.89103600  | -2.56044700 | -1.51290200 |
| C  | 2.48001900  | -1.61390000 | -0.42481200 |
| H  | 3.01196300  | -2.53176200 | -0.21509600 |
| C  | 0.43953700  | 3.27714700  | -0.98716900 |
| H  | 0.43470700  | 3.43589400  | 0.09600500  |
| H  | 1.37924900  | 3.68657400  | -1.36627800 |
| H  | -0.37413300 | 3.86474000  | -1.41302800 |
| H  | 0.40448200  | -1.07533400 | 2.00935400  |
| N  | -0.45756800 | -0.59929200 | 1.81317600  |
| C  | -1.84899300 | 1.12783400  | 1.45562100  |
| C  | -2.46778100 | 2.47466600  | 1.45845100  |
| H  | -2.55133000 | 2.86856600  | 0.44054100  |
| H  | -3.47788600 | 2.45621000  | 1.87569200  |
| H  | -1.87983700 | 3.18373400  | 2.04206300  |
| H  | 2.82940700  | 1.72591400  | 0.17088300  |
| Cl | 4.49521400  | -0.44421500 | 0.95561800  |

Entry: H-5I

$E^{\text{CP}}$  (a.u.): -1101.10424

|   |             |             |             |
|---|-------------|-------------|-------------|
| C | -1.34097900 | 0.46975700  | 2.06464600  |
| C | -2.28948200 | -1.21273700 | 0.94702800  |
| H | -0.55680200 | 0.97428000  | 2.60683500  |
| C | -3.19133600 | -0.12916900 | 0.97117600  |
| C | -2.58322300 | -2.39824200 | 0.28763100  |
| C | -4.41330800 | -0.24571400 | 0.31065900  |
| C | -3.79446000 | -2.48288000 | -0.36940600 |
| H | -1.88192300 | -3.22398400 | 0.28209500  |
| H | -5.11990200 | 0.57663300  | 0.31937100  |
| C | -4.70276800 | -1.41570600 | -0.35965200 |
| H | -4.05406400 | -3.39488600 | -0.89188500 |
| H | -5.64801900 | -1.52166000 | -0.87649300 |
| C | -0.89463400 | 1.96876100  | -1.32943400 |
| C | -1.96617900 | 1.33354600  | -1.87398100 |
| C | 0.09686800  | 0.96087000  | -1.11920000 |
| H | -2.92549500 | 1.73878800  | -2.15578300 |
| N | -1.69624000 | -0.00650000 | -2.04565100 |

|   |             |             |             |
|---|-------------|-------------|-------------|
| H | -0.39133300 | -1.09907800 | -2.12029000 |
| N | 0.40203800  | -0.55857400 | -1.82678200 |
| C | 1.63120000  | 1.25358100  | -1.32852300 |
| C | 2.14089200  | 2.64273000  | -1.24251700 |
| H | 2.08466300  | 3.01575800  | -0.21457200 |
| H | 3.18813100  | 2.71014700  | -1.54790100 |
| H | 1.56527400  | 3.32042000  | -1.87357100 |
| H | -3.19044600 | 1.53704700  | -0.44502000 |
| F | -4.30448300 | -0.65067000 | -1.23943500 |

Entry: H-5Br

$E^{\text{CP}}$  (a.u.): -3379.44645

|    |             |             |             |
|----|-------------|-------------|-------------|
| C  | 0.96763600  | 0.56818000  | -2.05965800 |
| C  | 1.86948700  | -1.15623100 | -0.96643600 |
| H  | 0.20644200  | 1.09254700  | -2.61563200 |
| C  | 2.77140900  | -0.07412200 | -0.91479000 |
| C  | 2.13998100  | -2.36681200 | -0.34318300 |
| C  | 3.96855700  | -0.21592800 | -0.21494700 |
| C  | 3.32665800  | -2.47700800 | 0.35383100  |
| H  | 1.43990700  | -3.19187700 | -0.39539000 |
| H  | 4.67376700  | 0.60631500  | -0.16747700 |
| C  | 4.23449500  | -1.41145300 | 0.41901500  |
| H  | 3.56781700  | -3.40931700 | 0.84868100  |
| H  | 5.16030300  | -1.53881200 | 0.96528700  |
| C  | 0.36870700  | 1.90073700  | 1.36157800  |
| C  | 1.42083800  | 1.26093400  | 1.93803100  |
| C  | -0.60164600 | 0.89050300  | 1.07928700  |
| H  | 2.36372700  | 1.66586100  | 2.27104600  |
| N  | 1.15604300  | -0.08511100 | 2.06394100  |
| C  | -0.07044500 | -0.34007400 | 1.51328900  |
| C  | -1.85198900 | 0.92434700  | 0.46419800  |
| H  | 1.85334200  | -0.78757100 | 2.24235400  |
| C  | -0.76119400 | -1.53218300 | 1.35105400  |
| C  | -2.51718700 | -0.26739500 | 0.29253200  |
| H  | -0.34682900 | -2.47261600 | 1.69285100  |
| C  | -1.99129000 | -1.48817500 | 0.72698600  |
| H  | -2.56317500 | -2.39443700 | 0.58007700  |
| C  | 0.23310700  | 3.34055700  | 1.03718400  |
| H  | 0.11332900  | 3.48584500  | -0.04120100 |
| H  | -0.64318300 | 3.78360200  | 1.51720900  |
| H  | 1.10863500  | 3.90762000  | 1.35400200  |
| H  | -0.07816600 | -1.25389400 | -1.77902900 |
| N  | 0.78290800  | -0.74543600 | -1.68908300 |
| C  | 2.17304300  | 1.01696100  | -1.61833500 |
| C  | 2.76178800  | 2.36817800  | -1.77702000 |
| H  | 2.93421900  | 2.83557400  | -0.80171300 |
| H  | 3.72803800  | 2.33273500  | -2.28671600 |
| H  | 2.10683000  | 3.02571900  | -2.34931800 |
| H  | -2.28334700 | 1.85663400  | 0.12124000  |
| Br | -4.21617300 | -0.26789200 | -0.56102800 |

Entry: H-6F

$E^{\text{CP}}$  (a.u.): -905.18137

|   |             |             |             |
|---|-------------|-------------|-------------|
| C | -0.78201200 | 0.62841100  | 2.10845100  |
| C | -1.14337300 | -1.20964700 | 0.89461300  |
| H | -0.26630900 | 1.25334900  | 2.82052100  |
| C | -2.12204900 | -0.25274000 | 0.55779100  |
| C | -1.09117700 | -2.45402100 | 0.28141900  |
| C | -3.06461700 | -0.55690600 | -0.42278100 |
| C | -2.03025100 | -2.72605000 | -0.69330100 |
| H | -0.33725400 | -3.18282700 | 0.55342600  |
| H | -3.82395400 | 0.16846900  | -0.69302700 |
| C | -3.00830400 | -1.78609500 | -1.04557800 |
| H | -2.01943900 | -3.68949900 | -1.18718300 |
| H | -3.73429600 | -2.03917100 | -1.80748300 |
| C | 0.39408500  | 1.95049500  | -1.14910300 |
| C | -0.35325100 | 1.11928100  | -1.91913300 |
| C | 1.43637000  | 1.14600400  | -0.58680600 |
| H | -1.24607900 | 1.33191400  | -2.48584400 |
| N | 0.17656300  | -0.15537400 | -1.90281200 |

|   |             |             |             |
|---|-------------|-------------|-------------|
| C | -0.44349800 | -0.26351500 | -1.56020900 |
| C | 1.37540400  | 0.99017300  | -0.56496600 |
| H | -2.39373300 | -0.71091500 | -2.21588900 |
| C | 0.26425900  | -1.45255400 | -1.46086700 |
| C | 2.06533000  | -0.19764500 | -0.45635200 |
| H | -0.15845500 | -2.38836000 | -1.80574500 |
| C | 1.52359800  | -1.41163800 | -0.89766800 |
| H | 2.10305600  | -2.32076100 | -0.80591700 |
| C | -0.76042700 | 3.40332000  | -0.98085800 |
| H | -0.56413400 | 3.53050500  | 0.08838900  |
| H | 0.06844900  | 3.87589400  | -1.51402700 |
| H | -1.66830800 | 3.95811700  | -1.21917400 |
| H | -0.31042700 | -1.34035300 | 1.67298800  |
| N | -1.17442100 | -0.83010600 | 1.64129800  |
| C | -2.56268100 | 0.93447000  | 1.69048500  |
| C | -3.13865100 | 2.27960700  | 1.92850000  |
| H | -3.40512600 | 2.76219800  | 0.98297600  |
| H | -4.05054000 | 2.23323300  | 2.52945000  |
| H | -2.43245900 | 2.92991300  | 2.44568600  |
| H | 1.80799000  | 1.92199500  | -0.22134700 |
| I | 3.99663300  | -0.19865500 | 0.38195800  |

Entry: H-6Cl  
 $E^{\text{CP}}$  (a.u.): -1265.54033

|    |             |             |             |
|----|-------------|-------------|-------------|
| C  | -0.88994100 | 0.12551000  | 2.20887200  |
| C  | -0.78786200 | -1.59927900 | 0.79711300  |
| H  | -0.53796700 | 0.78527600  | 2.98618800  |
| C  | -1.99727700 | -0.91050800 | 0.57236600  |
| C  | -0.41874300 | -2.70323700 | 0.04078900  |
| C  | -2.85655600 | -1.35212100 | -0.43246400 |
| C  | -1.27945700 | -3.11008100 | -0.95806800 |
| H  | 0.51882200  | -3.21656400 | 0.22115300  |
| H  | -3.79377900 | -0.83762900 | -0.61436100 |
| C  | -2.48981600 | -2.44241500 | -1.19308200 |
| H  | -1.02161100 | -3.96848800 | -1.56510600 |
| H  | -3.14699400 | -2.80067800 | -1.97530000 |
| C  | -0.50763300 | 2.41896300  | -0.90029600 |
| C  | -1.14239800 | 1.56606900  | -1.74703400 |
| C  | 0.70940500  | 1.77091600  | -0.52053400 |
| H  | -2.10069100 | 1.67463000  | -2.23065200 |
| N  | -0.38363200 | 0.43292100  | -1.94643600 |
| C  | 0.74095500  | 0.52320500  | -1.17618300 |
| C  | 1.74809600  | 2.10988200  | 0.34438500  |
| H  | -0.72863400 | -0.42027600 | -2.35197300 |
| C  | 1.76218200  | -0.39322400 | -0.97520500 |
| C  | 2.76444300  | 1.20569100  | 0.56621900  |
| H  | 1.77547000  | -1.35870000 | -1.46268100 |
| C  | 2.74721300  | -0.02927200 | -0.08707100 |
| C  | -0.98561700 | 3.73342000  | -0.40870800 |
| H  | -1.09071300 | 3.72764500  | 0.68099300  |
| H  | -0.29177900 | 4.54044200  | -0.65710200 |
| H  | -1.95697000 | 3.98756000  | -0.83426300 |
| C  | -3.11607800 | 1.20426500  | 1.57848600  |
| H  | -3.17984600 | 1.78822700  | 0.65450600  |
| H  | -4.09536600 | 0.74616700  | 1.73853200  |
| H  | -2.93662800 | 1.90165900  | 2.39742700  |
| C  | -2.04068300 | 0.18794500  | 1.48675200  |
| N  | -0.13701800 | -0.95802900 | 1.81490500  |
| H  | 0.80242300  | -1.15126300 | 2.11143400  |
| H  | 1.75127300  | 3.06710700  | 0.85249700  |
| H  | 3.57815900  | 1.43218700  | 1.24118200  |
| Cl | 4.01988100  | -1.17976000 | 0.26766000  |

Entry: H-6I  
 $E^{\text{CP}}$  (a.u.): -1101.10504

|   |             |             |             |
|---|-------------|-------------|-------------|
| C | -1.37917800 | -0.12035200 | 2.20729800  |
| C | -1.18918400 | -1.74802000 | 0.69301500  |
| H | -1.03452500 | 0.56354500  | 2.96670500  |
| C | -2.51625500 | -1.27128500 | 0.67163600  |
| C | -0.74696500 | -2.73405200 | -0.17846400 |

|   |             |             |             |
|---|-------------|-------------|-------------|
| C | 1.25585000  | -0.16784400 | -1.06597900 |
| C | 2.47947000  | 1.41176200  | 0.29673000  |
| H | -0.31194500 | -0.97805400 | -2.21205300 |
| C | 2.08285900  | -1.21547700 | -0.68068000 |
| C | 3.30684600  | 0.38255800  | 0.69478800  |
| H | 1.96325900  | -2.22782900 | -1.04296700 |
| C | 3.09089600  | -0.90128400 | 0.19841400  |
| C | 0.16981900  | 3.39065000  | -0.88024900 |
| H | -0.01449800 | 3.56427100  | 0.18511500  |
| H | 1.03547300  | 3.99771100  | -1.15760000 |
| H | -0.69169300 | 3.76904800  | -1.43165700 |
| C | -2.63792800 | 2.18023400  | 1.28450200  |
| H | -2.56976700 | 2.62907100  | 0.28776100  |
| H | -3.69989400 | 2.02387900  | 1.49025700  |
| H | -2.26273000 | 2.91042400  | 2.00238900  |
| C | -1.87241100 | 0.91253900  | 1.34756400  |
| N | -0.34583800 | -0.65377200 | 1.85756500  |
| H | 0.51872100  | -1.04384100 | 2.18590700  |
| H | 2.63532000  | 2.41559500  | 0.67428000  |
| H | 4.13032000  | 0.54212900  | 1.37739100  |
| F | 3.91275100  | -1.87687000 | 0.60372600  |

Entry: H-6Br  
 $E^{\text{CP}}$  (a.u.): -3379.44688

|    |             |             |             |
|----|-------------|-------------|-------------|
| C  | -0.99359500 | -0.13016400 | 2.20126800  |
| C  | -0.94720500 | -1.77415100 | 0.69442400  |
| H  | -0.59309000 | 0.51883500  | 2.96375300  |
| C  | -2.21804700 | -1.16448000 | 0.65014300  |
| C  | -0.59403900 | -2.80403700 | -0.16670800 |
| C  | -3.15744800 | -1.61783200 | -0.27503500 |
| C  | -1.53616100 | -3.22107000 | -1.08536700 |
| H  | 0.38936300  | -3.25786200 | -0.12334000 |
| H  | -4.14287100 | -1.16740700 | -0.31935200 |
| C  | -2.80884600 | -2.63567000 | -1.13788800 |
| H  | -1.29297000 | -4.02305200 | -1.77040400 |
| H  | -3.52751200 | -2.99978800 | -1.86102500 |
| C  | -1.38766100 | 2.43864800  | -0.83374300 |
| C  | -1.93889700 | 1.48917100  | -1.63608200 |
| C  | -0.06864100 | 1.98121400  | -0.52448200 |
| H  | -2.92900900 | 1.45019000  | -2.06297300 |
| N  | -1.03360400 | 0.48000700  | -1.87965400 |
| C  | 0.10909500  | 0.74519400  | -1.17849900 |
| C  | 0.95831400  | 2.47984000  | 0.27457400  |
| H  | -1.27422000 | -0.42222900 | -2.25478200 |
| C  | 1.26596400  | -0.00685800 | -1.03926000 |
| C  | 2.10955300  | 1.73844500  | 0.43603800  |
| H  | 1.39027000  | -0.96177000 | -1.53250200 |
| C  | 2.23923400  | 0.50855000  | -0.21453100 |
| C  | -2.01575300 | 3.68701900  | -0.33792800 |
| H  | -2.01113300 | 3.72302400  | 0.75561700  |
| H  | -1.48578800 | 4.57706100  | -0.68666000 |
| H  | -3.05225900 | 3.76774100  | -0.66736000 |
| C  | -3.34506000 | 0.81577300  | 1.89430400  |
| H  | -3.60736500 | 1.38674200  | 0.99719900  |
| H  | -4.24591200 | 0.28513000  | 2.21327900  |
| H  | -3.08560200 | 1.52982100  | 2.67674500  |
| C  | -2.22349000 | -0.11494700 | 1.62078800  |
| N  | -0.22558700 | -1.14115800 | 1.66898200  |
| H  | 0.75642600  | -1.26992100 | 1.83416200  |
| H  | 0.85014800  | 3.43298500  | 0.77897100  |
| H  | 2.91583200  | 2.09549100  | 1.06220100  |
| Br | 3.80217500  | -0.52928000 | 0.09768800  |

Entry: H-7F  
 $E^{\text{CP}}$  (a.u.): -905.18041

|   |            |             |            |
|---|------------|-------------|------------|
| C | 0.89277500 | -1.10789900 | 1.95535300 |
| C | 1.18856200 | 0.90997800  | 1.04643900 |
| H | 0.42973200 | -1.84167000 | 2.59636000 |
| C | 2.09928100 | 0.01348900  | 0.45126700 |
| C | 1.11051700 | 2.24061800  | 0.65935300 |

|   |             |             |             |
|---|-------------|-------------|-------------|
| C | -3.42028100 | -1.81374000 | -0.23998000 |
| C | -1.65844700 | -3.24314000 | -1.08152700 |
| H | 0.27946100  | -3.08209300 | -0.15535200 |
| H | -4.44618400 | -1.46338500 | -0.26635200 |
| C | -2.98499800 | -2.79046100 | -1.11107700 |
| H | -1.34690000 | -4.01523300 | -1.77340500 |
| H | -3.67468300 | -3.22434400 | -1.82385200 |
| C | -2.01269000 | 2.31816000  | -0.84697800 |
| C | -2.47081000 | 1.34007800  | -1.67300100 |
| C | -0.65351800 | 1.98670100  | -0.55428000 |
| H | -3.45510200 | 1.21238500  | -2.09581600 |
| N | -1.47093900 | 0.43262000  | -1.94557400 |
| C | -0.35702700 | 0.79099700  | -1.23867000 |
| C | 0.31984100  | 2.56399100  | 0.25801600  |
| H | -1.62367000 | -0.48049800 | -2.33919500 |
| C | 0.86637200  | 0.15009000  | -1.11137500 |
| C | 1.53711200  | 1.93349500  | 0.40583200  |
| H | 1.06994000  | -0.78264600 | -1.62216000 |
| C | 1.78914800  | 0.73351500  | -0.27018800 |
| C | -2.76336600 | 3.47384600  | -0.30040700 |
| H | -2.79684400 | 3.43486100  | 0.79310500  |
| H | -2.30202300 | 4.42656100  | -0.57209400 |
| H | -3.79207000 | 3.48693800  | -0.66219100 |
| C | -3.82380100 | 0.57286200  | 1.94333000  |
| H | -4.17100400 | 1.10095600  | 1.04951800  |
| H | -4.65213400 | -0.05223800 | 2.28695300  |
| H | -3.62818700 | 1.31867500  | 2.71456900  |
| C | -2.61332900 | -0.22986900 | 1.64611800  |
| N | -0.52053900 | -1.04529400 | 1.65742600  |
| H | 0.47007700  | -1.08223700 | 1.81737700  |
| H | 0.11742600  | 3.48873400  | 0.78623600  |
| H | 2.29835800  | 2.35713100  | 1.04690600  |
| I | 3.60552200  | -0.27160900 | 0.08585400  |

Entry: H-7Cl

$E^{\text{CP}}$  (a.u.): -1265.54167

|   |             |             |             |
|---|-------------|-------------|-------------|
| C | 1.71287600  | -0.85508200 | 1.84147900  |
| C | 0.95156900  | 1.12048200  | 1.13370000  |
| H | 1.70859700  | -1.76101800 | 2.42727500  |
| C | 2.10977900  | 0.79870500  | 0.39731900  |
| C | 0.23346300  | 2.28430500  | 0.89991000  |
| C | 2.54616100  | 1.66669600  | -0.60166100 |
| C | 0.68049200  | 3.12099400  | -0.10224900 |
| H | -0.65663400 | 2.52069000  | 1.47018300  |
| H | 3.43566400  | 1.43339500  | -1.17645000 |
| C | 1.82626900  | 2.81677700  | -0.84857900 |
| H | 0.13600600  | 4.03323600  | -0.31178300 |
| H | 2.15261400  | 3.50273000  | -1.61990300 |
| C | 0.21849200  | -1.87728700 | -1.31649000 |
| C | 0.37527100  | -0.71805600 | -2.00917400 |
| C | -0.90299700 | -1.67833000 | -0.45114300 |
| H | 1.12731100  | -0.45590600 | -2.73659000 |
| N | -0.60376000 | 0.18699100  | -1.66354200 |
| C | -1.38051300 | -0.37358700 | -0.69322800 |
| C | -1.52774300 | -2.47401500 | 0.50768000  |
| H | -0.58192300 | 1.17133100  | -1.87083300 |
| C | -2.47376800 | 0.11803600  | 0.00190000  |
| C | -2.60037600 | -1.96103500 | 1.20564900  |
| C | -3.07813900 | -0.66947100 | 0.95565700  |
| C | 1.03494200  | -3.11164100 | -1.40597500 |
| H | 1.45094400  | -3.38336100 | -0.43111600 |
| H | 0.44218900  | -3.96524700 | -1.74536300 |
| H | 1.86635900  | -2.98961400 | -2.10108200 |
| H | -0.07781300 | -0.00520100 | 2.59576500  |
| N | 0.73805900  | 0.10048700  | 2.02147300  |
| C | 2.58020600  | -0.46562600 | 0.86937800  |
| C | 3.75049800  | -1.20299900 | 0.33741200  |
| H | 3.60785200  | -1.44359400 | -0.72157000 |
| H | 4.66912500  | -0.61544400 | 0.40980100  |
| H | 3.91115600  | -2.14069900 | 0.87053800  |
| H | -1.17283900 | -3.47984300 | 0.69919700  |

|   |             |             |             |
|---|-------------|-------------|-------------|
| C | 2.94510100  | 0.46874900  | -0.55845500 |
| C | 1.95135900  | 2.66306400  | -0.35066200 |
| H | 0.40136700  | 2.91981200  | 1.11648400  |
| H | 3.65142300  | -0.20870300 | -1.02521000 |
| C | 2.86155200  | 1.78648000  | -0.95557500 |
| H | 1.91285800  | 3.69501600  | -0.67541800 |
| H | 3.51236000  | 2.15720000  | -1.73722300 |
| C | -0.74972400 | -1.74318000 | -1.27848400 |
| C | -0.06223800 | -0.84127300 | -2.02964800 |
| C | -1.65578900 | -0.98745400 | -0.46993500 |
| H | 0.72907400  | -1.01184000 | -2.74257200 |
| N | -0.50313000 | 0.43781300  | -1.77159800 |
| C | -1.45691000 | 0.36613900  | -0.79676200 |
| C | -2.58615800 | -1.33400400 | 0.51218900  |
| H | -0.01332100 | 1.27969300  | -2.02251000 |
| C | -2.17761500 | 1.35402500  | -0.14844500 |
| C | -3.28134700 | -0.33257400 | 1.15349600  |
| C | -3.07914600 | 1.01663700  | 0.82886600  |
| C | -0.59344500 | -3.21706800 | -1.25324200 |
| H | -0.39603300 | -3.57068900 | -0.23677400 |
| H | -1.49588400 | -3.72944300 | -1.59700800 |
| H | 0.23414700  | -3.54147200 | -1.88512800 |
| H | -0.34855600 | 0.53615600  | 2.44714500  |
| N | 0.47556600  | 0.20482700  | 1.97897700  |
| C | 1.89214100  | -1.26860400 | 1.04778100  |
| C | 2.59973900  | -2.51676900 | 0.67558300  |
| H | 2.41339700  | -2.76717800 | -0.37476100 |
| H | 3.68207500  | -2.42367400 | 0.79525700  |
| H | 2.26818400  | -3.36141000 | 1.28044800  |
| H | -2.75288800 | -2.37386200 | 0.76653200  |
| H | -4.00751700 | -0.58066400 | 1.91646800  |
| F | -1.97599500 | 2.63324300  | -0.48107500 |
| H | -3.63544300 | 1.80292800  | 1.32122600  |

Entry: H-7Br

$E^{\text{CP}}$  (a.u.): -3379.44843

|   |             |             |             |
|---|-------------|-------------|-------------|
| C | -2.37347100 | 0.53496000  | 1.72015800  |
| C | -1.04002600 | -1.16331800 | 1.15416200  |
| H | -2.65425100 | 1.43730800  | 2.24110800  |
| C | -2.22650600 | -1.25811200 | 0.39910200  |
| C | 0.00062500  | -2.06874000 | 1.00458000  |
| C | -2.36427100 | -2.29034000 | -0.52728300 |
| C | -0.15750300 | -3.07535400 | 0.07447500  |
| H | 0.90949400  | -1.98152800 | 1.58759300  |
| H | -3.27115200 | -2.37985900 | -1.11485900 |
| C | -1.32913900 | -3.18788200 | -0.68486900 |
| H | 0.63876100  | -3.79547100 | -0.06680300 |
| H | -1.42143000 | -3.99677500 | -1.39838500 |
| C | -1.05411900 | 1.70669900  | -1.42657000 |
| C | -0.74513400 | 0.58396500  | -2.12897100 |
| C | -0.00073300 | 1.88697200  | -0.47738700 |
| H | -1.30203600 | 0.09550000  | -2.91276900 |
| N | 0.45204800  | 0.06077000  | -1.69446400 |
| C | 0.91373300  | 0.82942400  | -0.66876300 |
| C | 0.23066400  | 2.82308200  | 0.52810000  |
| H | 0.82761800  | -0.83553800 | -1.95023700 |
| C | 2.04458000  | 0.71907300  | 0.12500600  |
| C | 1.35073400  | 2.69073300  | 1.32115500  |
| C | 2.25909000  | 1.64334300  | 1.12347400  |
| C | -2.24977100 | 2.57210000  | -1.56397700 |
| H | -2.80513100 | 2.62103400  | -0.62171200 |
| H | -1.98126800 | 3.59734100  | -1.83174000 |
| H | -2.92834200 | 2.19537000  | -2.33009700 |
| H | -0.42495900 | 0.32121900  | 2.52634400  |
| N | -1.16328100 | -0.07132300 | 1.97113800  |
| C | -3.06180800 | -0.16057200 | 0.77562300  |
| C | -4.39038800 | 0.15403200  | 0.19847500  |
| H | -4.31992000 | 0.29452200  | -0.88516500 |
| H | -5.11146400 | -0.64940100 | 0.36903500  |
| H | -4.80405400 | 1.06953600  | 0.62376100  |
| H | -0.46567300 | 3.63911500  | 0.68285100  |

|    |             |             |             |
|----|-------------|-------------|-------------|
| H  | -3.09918700 | -2.56409900 | 1.95305100  |
| H  | -3.93285300 | -0.28374300 | 1.49454800  |
| Cl | -3.07444500 | 1.71652100  | -0.35533500 |

Entry: H-7I

$E^{\text{CP}}$  (a.u.): -1101.10660

|   |             |             |             |
|---|-------------|-------------|-------------|
| C | -2.77231700 | 0.32125600  | 1.71476500  |
| C | -1.27975400 | -1.24188200 | 1.15784600  |
| H | -3.14209500 | 1.18992200  | 2.23707900  |
| C | -2.44197000 | -1.44039700 | 0.38511100  |
| C | -0.15767600 | -2.04531600 | 1.01462900  |
| C | -2.47051000 | -2.47318200 | -0.55084800 |
| C | -0.20798100 | -3.05274700 | 0.07326600  |
| H | 0.73182300  | -1.88162200 | 1.61131100  |
| H | -3.35730500 | -2.64227500 | -1.15126700 |
| C | -1.35377100 | -3.26789400 | -0.70269700 |
| H | 0.65612600  | -3.69093700 | -0.06397500 |
| H | -1.35995900 | -4.07475100 | -1.42436200 |
| C | -1.55767400 | 1.70754700  | -1.42070900 |
| C | -1.14402100 | 0.61125300  | -2.11055300 |
| C | -0.54570800 | 1.97113000  | -0.44640400 |
| H | -1.63936600 | 0.08179100  | -2.90885200 |
| N | 0.08046900  | 0.18682400  | -1.64638500 |
| C | 0.46063800  | 0.99381100  | -0.61527700 |
| C | -0.41701200 | 2.92475300  | 0.56007600  |
| H | 0.53467900  | -0.67538300 | -1.89369500 |
| C | 1.58916600  | 0.98602300  | 0.19332200  |
| C | 0.69216800  | 2.88898100  | 1.37756400  |
| C | 1.69460000  | 1.92890300  | 1.19567300  |
| C | -2.79669200 | 2.49611100  | -1.62557500 |
| H | -3.36120800 | 2.60738700  | -0.69544100 |
| H | -2.57747800 | 3.50638500  | -1.98183500 |
| H | -3.45164700 | 2.02397300  | -2.35851800 |
| H | -0.82114000 | 0.28762900  | 2.54190900  |
| N | -1.51375400 | -0.17085800 | 1.97833400  |
| C | -3.38044800 | -0.42792000 | 0.75666000  |
| C | -4.72130500 | -0.22979900 | 0.15578100  |
| H | -4.63827500 | 0.01081600  | -0.90971800 |
| H | -5.33900600 | -1.12785200 | 0.23400200  |
| H | -5.25903300 | 0.58774000  | 0.63744500  |
| H | -1.18269700 | 3.67963400  | 0.69644300  |
| H | 0.81082500  | 3.62262100  | 2.16451500  |
| H | 2.56889400  | 1.93772100  | 1.83339600  |
| I | 3.12682000  | -0.40487500 | -0.14279000 |

Entry: 4Cl-4Cl

$E^{\text{CP}}$  (a.u.): -1725.14575

|   |             |             |             |
|---|-------------|-------------|-------------|
| C | -0.04602900 | -0.68002900 | 2.05850400  |
| C | 1.02620900  | 1.09749900  | 1.24867600  |
| H | -0.83392800 | -1.20536300 | 2.57544100  |
| C | 1.72345600  | -0.06622600 | 0.84869300  |
| C | 1.41775000  | 2.37824500  | 0.88341100  |
| C | 2.84490300  | 0.11800400  | 0.04030800  |
| C | 2.53279800  | 2.50255800  | 0.08564300  |
| H | 0.85337500  | 3.24389000  | 1.20649500  |
| C | 3.24731000  | 1.37678300  | -0.34022600 |
| H | 2.87311100  | 3.48430700  | -0.21692400 |
| H | 4.12439900  | 1.48634500  | -0.96314900 |
| C | -1.01871100 | -1.19367500 | -1.38389000 |
| C | 0.04597600  | -0.68086800 | -2.05826600 |
| C | -1.72341500 | -0.06647400 | -0.84860500 |
| H | 0.83377900  | -1.20645200 | -2.57509300 |
| N | 0.03931000  | 0.69179300  | -1.99957900 |
| C | -1.02608800 | 1.09704600  | -1.24902400 |
| C | -2.84488400 | 0.11814300  | -0.04033800 |
| H | 0.78228200  | 1.29060300  | -2.31060800 |
| C | -1.41746300 | 2.37794500  | -0.88414500 |
| C | -3.24714000 | 1.37709000  | 0.33980800  |
| H | -0.85298600 | 3.24341900  | -1.20750500 |
| C | -2.53247400 | 2.50264400  | -0.08638000 |

|    |            |             |             |
|----|------------|-------------|-------------|
| H  | 1.54890400 | 3.41013100  | 2.10500800  |
| H  | 3.14216000 | 1.56184000  | 1.74298200  |
| Br | 3.27320100 | -0.69059600 | -0.18235900 |

Entry: 4F-4F

$E^{\text{CP}}$  (a.u.): -1004.42800

|   |             |             |             |
|---|-------------|-------------|-------------|
| C | -0.16322000 | 0.75130000  | 2.07894600  |
| C | -1.20126200 | -0.97316400 | 1.11173900  |
| H | 0.58235100  | 1.23648300  | 2.68933600  |
| C | -1.82496500 | 0.22137800  | 0.69732300  |
| C | -1.60041000 | -2.22599700 | 0.65765800  |
| C | -2.86344200 | 0.11007700  | -0.21971800 |
| C | -2.63884600 | -2.27557000 | -0.24547100 |
| H | -1.10391900 | -3.12610400 | 0.99687200  |
| C | -3.27397000 | -1.10937100 | -0.69429700 |
| H | -2.98088400 | -3.23302400 | -0.61634400 |
| H | -4.09228900 | -1.15165200 | -1.40010300 |
| C | 1.14904400  | 1.31366000  | -1.32784700 |
| C | 0.16341200  | 0.75284600  | -2.07829800 |
| C | 1.82497200  | 0.22140100  | -0.69705100 |
| H | -0.58182200 | 1.23872100  | -2.68855100 |
| N | 0.19741000  | -0.61927500 | -1.96954500 |
| C | 1.20053500  | -0.97262600 | -1.11189900 |
| C | 2.86366400  | 0.10906600  | 0.21964000  |
| H | -0.51462900 | -1.24185900 | -2.30584600 |
| C | 1.59917200  | -2.22591000 | -0.65860900 |
| C | 3.27368700  | -1.11084400 | 0.69344500  |
| H | 1.10213400  | -3.12558000 | -0.99817300 |
| C | 2.63785200  | -2.27649000 | 0.24418900  |
| H | 4.09217100  | -1.15391900 | 1.39901300  |
| H | 2.97951100  | -3.23431400 | 0.61445600  |
| C | 1.43740800  | 2.76087400  | -1.17005500 |
| H | 1.33942000  | 3.07182300  | -0.12662400 |
| H | 2.45442800  | 3.01063200  | -1.47875700 |
| H | 0.74700000  | 3.36078000  | -1.76439700 |
| F | 3.46152200  | 1.21958600  | 0.66137900  |
| H | 0.51412900  | -1.24380800 | 2.30485100  |
| N | -0.19818700 | -0.62080300 | 1.96987400  |
| C | -1.14843000 | 1.31298200  | 1.32861000  |
| C | -1.43600300 | 2.76037100  | 1.17107600  |
| H | -1.33965300 | 3.07078000  | 0.12733200  |
| H | -2.45231000 | 3.01095700  | 1.48146400  |
| H | -0.74407800 | 3.35989500  | 1.76403600  |
| F | -3.46055600 | 1.22117300  | -0.66106200 |

Entry: 4Br-4Br

$E^{\text{CP}}$  (a.u.): -5952.95730

|   |             |             |             |
|---|-------------|-------------|-------------|
| C | -0.22878500 | -0.58125900 | 2.11419400  |
| C | 0.81012700  | 1.26344900  | 1.42542300  |
| H | -1.01284800 | -1.15847800 | 2.57850800  |
| C | 1.58078900  | 0.14439400  | 1.02781700  |
| C | 1.16925700  | 2.57298300  | 1.13927600  |
| C | 2.74165900  | 0.40968400  | 0.29867200  |
| C | 2.32409200  | 2.77818200  | 0.42033400  |
| H | 0.54765100  | 3.40012100  | 1.45824900  |
| C | 3.10997700  | 1.70085200  | -0.00358300 |
| H | 2.63942800  | 3.78519100  | 0.18012300  |
| H | 4.01893700  | 1.87838300  | -0.56255000 |
| C | -0.89334600 | -1.02861000 | -1.48716100 |
| C | 0.22845600  | -0.58252600 | -2.11419400 |
| C | -1.58082600 | 0.14405300  | -1.02796900 |
| H | 1.01230800  | -1.16014100 | -2.57837900 |
| N | 0.27986900  | 0.78973900  | -2.09971900 |
| C | -0.80970000 | 1.26272400  | -1.42572800 |
| C | -2.74159100 | 0.40989000  | -0.29888900 |
| H | 1.08742100  | 1.33901900  | -2.33463900 |
| C | -1.16829100 | 2.57243700  | -1.13972100 |
| C | -3.10936200 | 1.70123100  | 0.00326800  |
| H | -0.54635100 | 3.39928700  | -1.45879300 |
| C | -2.32300600 | 2.77818400  | -0.42074500 |

|    |             |             |             |
|----|-------------|-------------|-------------|
| H  | -4.12424600 | 1.48695800  | 0.96265300  |
| H  | -2.87265000 | 3.48452900  | 0.21589700  |
| C  | -1.33265500 | -2.63743700 | -1.23084100 |
| H  | -1.32656600 | -2.93907400 | -0.18024000 |
| H  | -2.31962600 | -2.88734300 | -1.62400200 |
| H  | -0.59565500 | -3.24406800 | -1.75930300 |
| H  | -0.78195300 | 1.29164800  | 2.31055000  |
| N  | -0.03929400 | 0.69259200  | 1.99923700  |
| C  | 1.01865500  | -1.19317100 | 1.38437100  |
| C  | 1.33243000  | -2.63701800 | 1.23178600  |
| H  | 1.32582900  | -2.93913800 | 0.18133100  |
| H  | 2.31957100  | -2.88681100 | 1.62458300  |
| H  | 0.59562200  | -3.24337000 | 1.76083500  |
| Cl | -3.75244300 | -1.26145900 | 0.53446400  |
| Cl | 3.75219300  | -1.26190100 | -0.53419700 |

Entry: 4I-4I  
 $E^{\text{CP}}$  (a.u.): -1396.27270

|   |             |             |             |
|---|-------------|-------------|-------------|
| C | 0.39313900  | 0.15443400  | -2.02202800 |
| C | -0.95281200 | 1.76255500  | -1.28197000 |
| H | 1.29142500  | -0.26252500 | -2.45098000 |
| C | -1.57439200 | 0.51421600  | -1.02559000 |
| C | -1.50847300 | 2.97890100  | -0.91423300 |
| C | -2.80372200 | 0.54690200  | -0.35859900 |
| C | -2.71937300 | 2.95813400  | -0.25928900 |
| H | -1.00121900 | 3.90968300  | -1.13647900 |
| C | -3.36446400 | 1.74911200  | 0.01922300  |
| H | -3.18995600 | 3.88612200  | 0.03913300  |
| H | -4.31685600 | 1.75900000  | 0.53226900  |
| C | 0.76395500  | -0.52701100 | 1.63461200  |
| C | -0.31001100 | 0.11037300  | 2.17473500  |
| C | 1.59289400  | 0.50030500  | 1.06869500  |
| H | -1.16755700 | -0.32077400 | 2.66747000  |
| N | -0.19916300 | 1.46785600  | 2.01388300  |
| C | 0.95155100  | 1.73771000  | 1.33214300  |
| C | 2.78664100  | 0.55188100  | 0.34117000  |
| H | -0.92571300 | 2.13574700  | 2.19766900  |
| C | 1.46770700  | 2.96277600  | 0.93644500  |
| C | 3.30433600  | 1.76210400  | -0.07152400 |
| H | 0.95125000  | 3.88496400  | 1.17247800  |
| C | 2.65060300  | 2.96106600  | 0.23214600  |
| H | 4.22963400  | 1.78673800  | -0.63164400 |
| H | 3.09133700  | 3.89605600  | -0.08918100 |
| C | 0.97506700  | -1.99757000 | 1.67510800  |
| H | 1.09184800  | -2.42577100 | 0.67809700  |
| H | 1.86909600  | -2.26938300 | 2.24041000  |
| H | 0.11844000  | -2.48242400 | 2.14766200  |
| H | 0.97360600  | 2.18446800  | -2.01211100 |
| N | 0.23181400  | 1.51284700  | -1.91453400 |
| C | -0.68638500 | -0.50139200 | -1.51871100 |
| C | -0.83156600 | -1.97994700 | -1.48445500 |
| H | -0.94420200 | -2.35076100 | -0.46269900 |
| H | -1.70133400 | -2.32718700 | -2.04529800 |
| H | 0.05694900  | -2.44894900 | -1.91213700 |
| I | -3.85583800 | -1.20694100 | 0.15670400  |
| I | 3.82822500  | -1.18715800 | -0.24156000 |

Entry: 4Cl-5Cl  
 $E^{\text{CP}}$  (a.u.): -1725.14546

|   |             |             |             |
|---|-------------|-------------|-------------|
| C | -0.52492400 | 1.05717900  | -1.91982900 |
| C | 1.05508700  | -0.43023300 | -1.40942800 |
| H | -1.47255800 | 1.39484000  | -2.30999900 |
| C | 1.46458900  | 0.83410800  | -0.93956900 |
| C | 1.82556500  | -1.56752300 | -1.21559500 |
| C | 2.67482000  | 0.95693200  | -0.25764700 |
| C | 3.01462300  | -1.43525000 | -0.52924700 |
| H | 1.50444300  | -2.53390300 | -1.58399700 |
| H | 3.02055300  | 1.91316400  | 0.11470500  |
| C | 3.41993500  | -0.18153200 | -0.06210600 |
| H | 3.65080300  | -2.29202800 | -0.35554500 |

|    |             |             |             |
|----|-------------|-------------|-------------|
| H  | -4.01821200 | 1.87919600  | 0.56227400  |
| H  | -2.63791300 | 3.78534700  | -0.18061400 |
| C  | -1.26217300 | -2.45831400 | -1.32058700 |
| H  | -1.29463800 | -2.74617200 | -0.26640700 |
| H  | -2.24231000 | -2.68569100 | -1.74263400 |
| H  | -0.52725300 | -3.09439200 | -1.81676400 |
| H  | -1.08710100 | 1.34066600  | 2.33402200  |
| N  | -0.27971600 | 0.79102200  | 2.09936900  |
| C  | 0.89294700  | -1.02791000 | 1.48743900  |
| C  | 1.26133700  | -2.45782100 | 1.32157800  |
| H  | 1.29430400  | -2.74615200 | 0.26755000  |
| H  | 2.24111900  | -2.68544200 | 1.74431500  |
| H  | 0.52587900  | -3.09343200 | 1.81757000  |
| Br | 3.84535800  | -1.00193600 | -0.33690200 |
| Br | -3.84566800 | -1.00127500 | 0.33701900  |

Entry: 4F-5F  
 $E^{\text{CP}}$  (a.u.): -1004.42756

|   |             |             |             |
|---|-------------|-------------|-------------|
| C | 0.20363600  | 0.96175800  | 1.98496200  |
| C | -1.22489000 | -0.56880900 | 1.21890300  |
| H | 1.08934500  | 1.32285800  | 2.48491100  |
| C | -1.66791100 | 0.70229100  | 0.80105100  |
| C | -1.89356800 | -1.73055300 | 0.86311000  |
| C | -2.81492100 | 0.80893400  | 0.01279800  |
| C | -3.01700000 | -1.61412000 | 0.06953700  |
| H | -1.54893200 | -2.70143600 | 1.19642900  |
| H | -3.19754800 | 1.76323100  | -0.32700700 |
| C | -3.45344200 | -0.35357600 | -0.33526300 |
| H | -3.58560600 | -2.48253600 | -0.23450500 |
| C | 1.35665900  | 1.07575000  | -1.48179500 |
| C | 0.26395700  | 0.60834100  | -2.14227000 |
| C | 1.88309200  | -0.04452300 | -0.76235000 |
| H | -0.42052000 | 1.14436200  | -2.78033600 |
| N | 0.08880900  | -0.73423800 | -1.89479700 |
| C | 1.06123000  | -1.15788800 | -1.03456600 |
| C | 2.93716000  | -0.23751900 | 0.12318100  |
| H | -0.71667200 | -1.27216100 | -2.15804000 |
| C | 1.27945900  | -2.41058600 | -0.47091400 |
| C | 3.16968700  | -1.45664100 | 0.70781100  |
| H | 0.63333300  | -3.24752600 | -0.70353200 |
| C | 2.33770000  | -2.54193300 | 0.40104500  |
| H | 4.00417500  | -1.56353000 | 1.38731800  |
| H | 2.54110000  | -3.50266200 | 0.85587600  |
| C | 1.86998200  | 2.46844400  | -1.48968900 |
| H | 1.85673900  | 2.90538100  | -0.48769500 |
| H | 2.90073000  | 2.52354000  | -1.84484900 |
| H | 1.25880900  | 3.10027000  | -2.13574000 |
| F | 3.72720200  | 0.79586100  | 0.42851700  |
| N | -0.09287600 | -0.38088800 | 1.97032100  |
| H | 0.55269900  | -1.10871400 | 2.22334500  |
| C | -0.73994400 | 1.66509400  | 1.30151800  |
| C | -0.79633800 | 3.12812100  | 1.06963300  |
| H | -0.77524000 | 3.35610400  | -0.00100100 |
| H | -1.71180700 | 3.57025900  | 1.47132800  |
| H | 0.04966000  | 3.63703700  | 1.53283500  |
| F | -4.55265700 | -0.29076200 | -1.09831900 |

Entry: 4Br-5Br  
 $E^{\text{CP}}$  (a.u.): -5952.95744

|   |             |             |            |
|---|-------------|-------------|------------|
| C | -0.82869400 | -1.05281900 | 2.01758800 |
| C | 0.83398700  | 0.38237100  | 1.63418400 |
| H | -1.80877500 | -1.36122400 | 2.34724000 |
| C | 1.21484600  | -0.88270400 | 1.14356000 |
| C | 1.65271400  | 1.49458000  | 1.50839800 |
| C | 2.44098600  | -1.02761200 | 0.49572700 |
| C | 2.86015700  | 1.33988000  | 0.85973300 |
| H | 1.35148300  | 2.46034400  | 1.89458400 |
| H | 2.75630100  | -1.98476500 | 0.09933000 |
| C | 3.23333800  | 0.08770300  | 0.35964500 |
| H | 3.52971900  | 2.18060400  | 0.73931100 |

|    |             |             |             |
|----|-------------|-------------|-------------|
| C  | -1.39300500 | 0.91687600  | 1.56220800  |
| C  | -0.20606600 | 0.59279800  | 2.14209200  |
| C  | -1.83226900 | -0.26544500 | 0.88149900  |
| H  | 0.45031000  | 1.21851400  | 2.72608900  |
| N  | 0.11821100  | -0.71689300 | 1.88376600  |
| C  | -0.85553400 | -1.26553400 | 1.10020700  |
| C  | -2.91725200 | -0.61026900 | 0.07630700  |
| H  | 1.00207300  | -1.14708500 | 2.08724100  |
| C  | -0.94580800 | -2.54254000 | 0.56331000  |
| C  | -3.02026000 | -1.86554500 | -0.47768600 |
| H  | -0.17727300 | -3.28087200 | 0.75427100  |
| C  | -2.03461700 | -2.82751500 | -0.23005500 |
| H  | -3.87735200 | -2.10355500 | -1.09267700 |
| H  | -2.14307500 | -3.81302200 | -0.66381100 |
| C  | -2.03755600 | 2.25424900  | 1.61289100  |
| H  | -2.12468500 | 2.69330500  | 0.61513900  |
| H  | -3.04413500 | 2.21411600  | 2.03174800  |
| H  | -1.44574700 | 2.93544600  | 2.22655400  |
| N  | -0.15322200 | -0.26331900 | -2.03042700 |
| H  | -0.77296400 | -1.01018700 | -2.29146300 |
| C  | 0.43912800  | 1.76975200  | -1.27734800 |
| C  | 0.42878700  | 3.21130400  | -0.93146500 |
| H  | 0.41295600  | 3.35374300  | 0.15463000  |
| H  | 1.31528500  | 3.72651700  | -1.30929100 |
| H  | -0.44883100 | 3.71236300  | -1.34126800 |
| Cl | -4.16999200 | 0.55974200  | -0.26649700 |
| Cl | 4.93845200  | -0.07331500 | 0.80373600  |

Entry: 4I-5I

$E^{\text{CP}}$  (a.u.): -1396.27269

|   |             |             |             |
|---|-------------|-------------|-------------|
| C | -1.06147700 | -1.08008900 | 2.03956900  |
| C | 0.64896600  | 0.32981100  | 1.79316000  |
| H | -2.06380500 | -1.37669700 | 2.30761700  |
| C | 1.02151800  | -0.92042900 | 1.26198100  |
| C | 1.50154200  | 1.42331100  | 1.76003400  |
| C | 2.26657500  | -1.06510800 | 0.65149100  |
| C | 2.72730500  | 1.26951200  | 1.14701000  |
| H | 1.20921100  | 2.37684500  | 2.18211200  |
| H | 2.56022700  | -2.01329400 | 0.21629000  |
| C | 3.09124600  | 0.03582700  | 0.59087300  |
| H | 3.41436800  | 2.10387500  | 1.09578900  |
| C | -1.14941800 | -0.58808900 | -1.68112000 |
| C | 0.13054700  | -0.31791300 | -2.05592200 |
| C | -1.60872800 | 0.57204600  | -0.96961800 |
| H | 0.81981800  | -0.94737200 | -2.59675000 |
| N | 0.50354500  | 0.93300900  | -1.63716900 |
| C | -0.53802700 | 1.50226400  | -0.96575400 |
| C | -2.77895400 | 0.95559400  | -0.30456100 |
| H | 1.42471000  | 1.32432300  | -1.71617100 |
| C | -0.61426600 | 2.74868500  | -0.36201800 |
| C | -2.86692300 | 2.19016700  | 0.30410100  |
| H | 0.22957300  | 3.42694200  | -0.38476600 |
| C | -1.78890400 | 3.08254200  | 0.27062900  |
| H | -3.78099400 | 2.47804800  | 0.80686900  |
| H | -1.89205100 | 4.04923200  | 0.74654600  |
| C | -1.85849300 | -1.86172700 | -1.97060400 |
| H | -2.12673500 | -2.39309400 | -1.05421300 |
| H | -2.78304100 | -1.70717300 | -2.52980700 |
| H | -1.21738200 | -2.51885600 | -2.56100500 |
| N | -0.62164300 | 0.20222300  | 2.28389400  |
| H | -1.21886400 | 0.97325900  | 2.52564200  |
| C | -0.08445200 | -1.80858400 | 1.43538200  |
| C | -0.13872000 | -3.22417200 | 0.99878700  |
| H | 0.07241100  | -3.31169600 | -0.07181800 |
| H | 0.59804900  | -3.84072300 | 1.51992700  |
| H | -1.12324200 | -3.65769900 | 1.17867800  |
| I | -4.44816300 | -0.31929100 | -0.12777600 |
| I | 4.92568100  | -0.10286800 | -0.43548000 |

Entry: 4Cl-6Cl

$E^{\text{CP}}$  (a.u.): -1725.14553

|    |             |             |             |
|----|-------------|-------------|-------------|
| C  | -1.26923900 | -0.75332600 | -1.64388300 |
| C  | -0.01420100 | -0.47543600 | -2.08963800 |
| C  | -1.71363400 | 0.42565600  | -0.95708400 |
| H  | 0.66089600  | -1.11450200 | -2.63667500 |
| N  | 0.35137900  | 0.80200400  | -1.74633400 |
| C  | -0.66513200 | 1.37486300  | -1.03877200 |
| C  | -2.85228200 | 0.80871400  | -0.24548100 |
| H  | 1.27538900  | 1.18536900  | -1.83585700 |
| C  | -0.73761100 | 2.63747500  | -0.46818400 |
| C  | -2.93769700 | 2.05160900  | 0.34014500  |
| H  | 0.08448700  | 3.33588100  | -0.56176600 |
| C  | -1.88175400 | 2.96304100  | 0.22361400  |
| H  | -3.83353800 | 2.32541700  | 0.88083600  |
| H  | -1.97927500 | 3.94040500  | 0.67816500  |
| C  | -1.97308500 | -2.04690400 | -1.84178100 |
| H  | -2.19229200 | -2.53916700 | -0.89109100 |
| H  | -2.92492000 | -1.92583000 | -2.36127100 |
| H  | -1.35337000 | -2.72383100 | -2.43234900 |
| N  | -0.41058000 | 0.24805300  | 2.18631100  |
| H  | -1.01332000 | 1.01322500  | 2.43255100  |
| C  | 0.13871800  | -1.78580500 | 1.40351200  |
| C  | 0.09345100  | -3.21798000 | 1.02261200  |
| H  | 0.19174700  | -3.33819600 | -0.06145000 |
| H  | 0.90419200  | -3.78818200 | 1.48279900  |
| H  | -0.84887500 | -3.67814000 | 1.32156100  |
| Br | -4.32292800 | -0.37612000 | -0.03217100 |
| Br | 4.89565300  | -0.06038400 | -0.55408900 |

Entry: 4F-6F

$E^{\text{CP}}$  (a.u.): -1004.42782

|   |             |             |             |
|---|-------------|-------------|-------------|
| C | 0.29604000  | 1.14248400  | 1.87295800  |
| C | -1.38291500 | -0.11013400 | 1.10310900  |
| H | 1.21288500  | 1.33941800  | 2.40669800  |
| C | -1.53546300 | 1.19773500  | 0.59862900  |
| C | -2.26096900 | -1.13605800 | 0.77569700  |
| C | -2.60088600 | 1.47995600  | -0.25295600 |
| C | -3.28918900 | -0.80643100 | -0.07335000 |
| H | -2.16336300 | -2.14324800 | 1.15822600  |
| H | -2.73611300 | 2.47988600  | -0.64834500 |
| C | -3.47774200 | 0.47208400  | -0.59453500 |
| H | -4.32023100 | 0.64487900  | -1.25018600 |
| C | 1.63319200  | 0.82896900  | -1.47306700 |
| C | 0.52160400  | 0.57201000  | -2.21292100 |
| C | 1.85250300  | -0.34433900 | -0.68378100 |
| H | 0.01501100  | 1.21178500  | -2.91793400 |
| N | 0.04676100  | -0.69200400 | -1.94474500 |
| C | 0.83961500  | -1.27402800 | -0.99728300 |
| C | 2.76912700  | -0.71001400 | 0.29451700  |
| H | -0.82365300 | -1.06681400 | -2.27471900 |
| C | 0.74495600  | -2.51849700 | -0.38257500 |
| C | 2.69534000  | -1.92364600 | 0.92938400  |
| H | -0.04297200 | -3.21305900 | -0.64448200 |
| C | 1.68103300  | -2.82599800 | 0.58009900  |
| H | 3.43235400  | -2.17055600 | 1.68131300  |
| H | 1.64196500  | -3.78686200 | 1.07652900  |
| C | 2.42179400  | 2.08595900  | -1.44774900 |
| H | 2.44217300  | 2.51286200  | -0.44083300 |
| H | 3.46009100  | 1.92528600  | -1.74443900 |
| H | 1.99116800  | 2.82846400  | -2.12083000 |
| F | 3.72670900  | 0.15485200  | 0.64177400  |
| N | -0.27469500 | -0.11442600 | 1.90063200  |
| H | 0.17790600  | -0.94165100 | 2.24850900  |
| C | -0.44914100 | 1.97966600  | 1.10650000  |
| C | -0.19454900 | 3.40787800  | 0.80281500  |
| H | -0.06058100 | 3.56142900  | -0.27282200 |
| H | -1.02722200 | 4.04421400  | 1.11361000  |
| H | 0.70462600  | 3.76791300  | 1.30382700  |
| F | -4.15944400 | -1.76090900 | -0.42380500 |

Entry: 4Br-6Br

$E^{\text{CP}}$  (a.u.): -5952.95772

|    |             |             |             |
|----|-------------|-------------|-------------|
| C  | -0.73639000 | 1.42909400  | -1.80765300 |
| C  | 1.15078400  | 0.38471600  | -1.24350200 |
| H  | -1.70283700 | 1.53252300  | -2.27554300 |
| C  | 1.13588900  | 1.64647200  | -0.61491100 |
| C  | 2.17652300  | -0.52772400 | -1.04526900 |
| C  | 2.18588800  | 1.99701700  | 0.23121500  |
| C  | 3.17830200  | -0.14891200 | -0.18187200 |
| H  | 2.18498600  | -1.50056700 | -1.51810200 |
| H  | 2.19693400  | 2.96389400  | 0.72097100  |
| C  | 3.20528300  | 1.09647600  | 0.45250000  |
| H  | 4.03192100  | 1.33484200  | 1.10747400  |
| C  | -1.64024600 | 0.52892900  | 1.60400100  |
| C  | -0.45064700 | 0.54128900  | 2.26486300  |
| C  | -1.62721200 | -0.65645800 | 0.79793000  |
| H  | -0.07177600 | 1.28029800  | 2.95326100  |
| N  | 0.29640500  | -0.56387000 | 1.93984800  |
| C  | -0.39506200 | -1.31109900 | 1.03137600  |
| C  | -2.48100400 | -1.24039200 | -0.13828700 |
| H  | 1.25862800  | -0.71036400 | 2.18724000  |
| C  | -0.02394900 | -2.48413400 | 0.38855800  |
| C  | -2.13041200 | -2.39679600 | -0.79577000 |
| H  | 0.93216300  | -2.95074000 | 0.59343700  |
| C  | -0.90361700 | -3.01568800 | -0.52728500 |
| H  | -2.81716100 | -2.82751000 | -1.51169900 |
| H  | -0.65278800 | -3.93028100 | -1.04856000 |
| C  | -2.68717800 | 1.57832000  | 1.70483700  |
| H  | -2.84901100 | 2.07755300  | 0.74589200  |
| H  | -3.65015200 | 1.17605700  | 2.02261600  |
| H  | -2.38684400 | 2.33918200  | 2.42735400  |
| N  | 0.01086300  | 0.28404300  | -1.99045000 |
| H  | -0.34584400 | -0.57413300 | -2.37380200 |
| C  | -0.08089600 | 2.29568500  | -0.99132200 |
| C  | -0.53986000 | 3.62277900  | -0.51656000 |
| H  | -0.65051500 | 3.62789300  | 0.57299600  |
| H  | 0.16864400  | 4.41524900  | -0.76993200 |
| H  | -1.50555500 | 3.88761600  | -0.94802300 |
| Cl | 4.46601800  | -1.28577500 | 0.15773400  |
| Cl | -4.01359800 | -0.49188200 | -0.52293700 |

Entry: 4I-6I

$E^{\text{CP}}$  (a.u.): -1396.27343

|   |             |             |             |
|---|-------------|-------------|-------------|
| C | -1.17188000 | 1.65846900  | -1.73844200 |
| C | 0.85676800  | 0.84042300  | -1.30525600 |
| H | -2.16885100 | 1.65257800  | -2.15094800 |
| C | 0.72146200  | 2.07247600  | -0.63451100 |
| C | 1.99294200  | 0.05322000  | -1.18637300 |
| C | 1.76751100  | 2.52784000  | 0.16541600  |
| C | 2.99003400  | 0.52182700  | -0.35864100 |
| H | 2.07400700  | -0.90089400 | -1.69122200 |
| H | 1.68910200  | 3.47652800  | 0.68428500  |
| C | 2.89678400  | 1.75071200  | 0.30836900  |
| H | 3.71498600  | 2.08308000  | 0.93354800  |
| C | -1.52443200 | 0.57560500  | 1.82645500  |
| C | -0.28571100 | 0.70954600  | 2.37348300  |
| C | -1.46070300 | -0.58283400 | 0.97940600  |
| H | 0.07001200  | 1.47094200  | 3.04971100  |
| N | 0.54491300  | -0.29532700 | 1.94825900  |
| C | -0.14361400 | -1.09635300 | 1.08451200  |
| C | -2.32819200 | -1.24985200 | 0.10726200  |
| H | 1.54052300  | -0.32568200 | 2.08243300  |
| C | 0.29654600  | -2.21730500 | 0.39604700  |
| C | -1.90434800 | -2.36349300 | -0.58712800 |
| H | 1.31450600  | -2.57179000 | 0.50874100  |
| C | -0.59883600 | -2.84565900 | -0.43841000 |
| H | -2.58899500 | -2.87419300 | -1.25138000 |
| H | -0.29888300 | -3.72747600 | -0.98959000 |
| C | -2.66609400 | 1.48776700  | 2.09820800  |
| H | -3.03101800 | 1.96867500  | 1.18757400  |
| H | -3.51651100 | 0.96760100  | 2.54362700  |
| H | -2.35715800 | 2.27321300  | 2.79045900  |

|    |             |             |             |
|----|-------------|-------------|-------------|
| C  | -1.00360400 | 1.61971200  | -1.79349700 |
| C  | 0.96760400  | 0.69805600  | -1.30716500 |
| H  | -1.97927600 | 1.67763700  | -2.24922400 |
| C  | 0.86990100  | 1.92653600  | -0.62283000 |
| C  | 2.06165700  | -0.14326000 | -1.16567900 |
| C  | 1.91065900  | 2.32205600  | 0.21510300  |
| C  | 3.04909800  | 0.27158000  | -0.30226300 |
| H  | 2.12296100  | -1.09528200 | -1.67631100 |
| H  | 1.86070200  | 3.26662500  | 0.74456200  |
| C  | 2.99813300  | 1.49178900  | 0.37989500  |
| H  | 3.81652800  | 1.76997700  | 1.03005300  |
| C  | -1.59437400 | 0.54519700  | 1.72963100  |
| C  | -0.38156000 | 0.66681900  | 2.33507600  |
| C  | -1.50518100 | -0.62438200 | 0.90336800  |
| H  | -0.04587800 | 1.43172100  | 3.01766000  |
| N  | 0.45341600  | -0.35542800 | 1.95978500  |
| C  | -0.20450800 | -1.15673200 | 1.07289100  |
| C  | -2.34341400 | -1.29433300 | 0.00973900  |
| H  | 1.43759400  | -0.40636600 | 2.15479200  |
| C  | 0.24675600  | -2.29211700 | 0.41499700  |
| C  | -1.91511500 | -2.41950200 | -0.65679300 |
| H  | 1.25459100  | -2.65836500 | 0.57169600  |
| C  | -0.62238300 | -2.91571500 | -0.45064700 |
| H  | -2.58857300 | -2.92441800 | -1.33611300 |
| H  | -0.31193100 | -3.80705100 | -0.98002200 |
| C  | -2.73699200 | 1.47593600  | 1.92320800  |
| H  | -3.04714700 | 1.94457800  | 0.98630100  |
| H  | -3.61557100 | 0.97246400  | 2.33039300  |
| H  | -2.45697500 | 2.27116000  | 2.61655600  |
| N  | -0.17804700 | 0.54295200  | -2.03511600 |
| H  | -0.45309800 | -0.30154100 | -2.50332600 |
| C  | -0.39935300 | 2.49615800  | -0.94769300 |
| C  | -0.94674500 | 3.76503800  | -0.41099900 |
| H  | -1.00931700 | 3.73167000  | 0.68162500  |
| H  | -0.31914700 | 4.62186500  | -0.66868500 |
| H  | -1.94906600 | 3.95866800  | -0.79407800 |
| Br | 4.51975100  | -0.88978100 | 0.01987500  |
| Br | -4.10110700 | -0.66344800 | -0.34435000 |

Entry: 4F-7F

$E^{\text{CP}}$  (a.u.): -1004.42684

|   |             |             |             |
|---|-------------|-------------|-------------|
| C | 0.11190700  | -0.86312300 | 2.07197000  |
| C | 1.59632000  | 0.29773100  | 0.89697600  |
| H | -0.69822400 | -1.00912200 | 2.76911800  |
| C | 1.72276400  | -1.05540200 | 0.53399400  |
| C | 2.37903300  | 1.26338300  | 0.28778500  |
| C | 2.64303400  | -1.42397100 | -0.44981100 |
| C | 3.27296900  | 0.90420200  | -0.68841400 |
| H | 2.75043600  | -2.46321900 | -0.73683600 |
| C | 3.40276800  | -0.44537400 | -1.05114100 |
| H | 3.88032200  | 1.67091800  | -1.15049600 |
| H | 4.12405900  | -0.71170300 | -1.81261100 |
| C | -1.59363600 | -1.17468800 | -1.23947800 |
| C | -0.52019200 | -1.02468200 | -2.05979400 |
| C | -1.81379500 | 0.11062200  | -0.65033400 |
| H | -0.02454300 | -1.76581700 | -2.66682200 |
| N | -0.07394000 | 0.27774500  | -2.03881100 |
| C | -0.83957800 | 0.99281700  | -1.15892100 |
| C | -2.70674500 | 0.61869100  | 0.28551000  |
| H | 0.81077300  | 0.58470000  | -2.40386800 |
| C | -0.75488600 | 2.32406900  | -0.76565100 |
| C | -2.64699800 | 1.92548100  | 0.69680300  |
| H | 0.00227800  | 2.98172400  | -1.17224100 |
| C | -1.66644200 | 2.77296100  | 0.16432100  |
| H | -3.36504800 | 2.28358400  | 1.42198400  |
| H | -1.63272400 | 3.80432800  | 0.48981800  |
| C | -2.35630000 | -2.42172800 | -0.98361800 |
| H | -2.31894200 | -2.69571800 | 0.07404000  |
| H | -3.41137200 | -2.31659000 | -1.24416500 |
| H | -1.94707400 | -3.25255800 | -1.56018500 |

|   |             |             |             |
|---|-------------|-------------|-------------|
| N | -0.30261800 | 0.62085200  | -1.99411000 |
| H | -0.54874200 | -0.24071000 | -2.44704300 |
| C | -0.58342600 | 2.57565200  | -0.92441600 |
| C | -1.16825200 | 3.82841500  | -0.38923900 |
| H | -1.17542400 | 3.81917100  | 0.70546400  |
| H | -0.59747600 | 4.70840500  | -0.69658200 |
| H | -2.19634100 | 3.96370500  | -0.72650700 |
| I | 4.67632600  | -0.69257200 | -0.02352800 |
| I | -4.29404600 | -0.58102400 | -0.25707700 |

Entry: 4Cl-7Cl  
 $E^{\text{CP}}$  (a.u.): -1725.14733

|    |             |             |             |
|----|-------------|-------------|-------------|
| C  | -0.14215000 | 0.67106100  | -1.98836900 |
| C  | 1.68339100  | 0.14380700  | -0.83484900 |
| H  | -1.00024200 | 0.48333400  | -2.61463400 |
| C  | 1.42304000  | 1.51576200  | -0.63841100 |
| C  | 2.75948000  | -0.46705200 | -0.21054800 |
| C  | 2.24590600  | 2.25998500  | 0.20488700  |
| C  | 3.55863200  | 0.27098000  | 0.63299700  |
| H  | 2.05589300  | 3.31546100  | 0.36125700  |
| C  | 3.29679300  | 1.63102400  | 0.83834800  |
| H  | 4.39892400  | -0.20799400 | 1.11746500  |
| H  | 3.94780000  | 2.19228200  | 1.49583800  |
| C  | -1.85715300 | 1.04104400  | 1.26583000  |
| C  | -0.79730300 | 1.29250400  | 2.08067500  |
| C  | -1.69477400 | -0.31087800 | 0.81769300  |
| H  | -0.55040600 | 2.20476800  | 2.60071500  |
| N  | 0.00099500  | 0.18057200  | 2.19592600  |
| C  | -0.51775700 | -0.81570800 | 1.41758900  |
| C  | -2.37910700 | -1.16672900 | -0.04431100 |
| H  | 0.91736400  | 0.16582400  | 2.60609900  |
| C  | -0.04807200 | -2.10286200 | 1.19848600  |
| C  | -1.92376500 | -2.44197000 | -0.28842200 |
| H  | 0.85563800  | -2.45714500 | 1.67778200  |
| C  | -0.76181400 | -2.90531300 | 0.33674600  |
| H  | -2.47909900 | -3.08202400 | -0.96023500 |
| H  | -0.42252400 | -3.91335100 | 0.13687700  |
| C  | -2.93868600 | 2.00341800  | 0.93328700  |
| H  | -2.99280500 | 2.19811700  | -0.14008500 |
| H  | -3.92072000 | 1.63387600  | 1.23416900  |
| H  | -2.76781600 | 2.95527900  | 1.43900800  |
| N  | 0.73194000  | -0.34733200 | -1.67754400 |
| H  | 0.57895100  | -1.32484300 | -1.85451200 |
| C  | 0.25188600  | 1.83007300  | -1.39613000 |
| C  | -0.39302200 | 3.16240100  | -1.47551600 |
| H  | -0.67715300 | 3.52132600  | -0.48133600 |
| H  | 0.27765000  | 3.91106800  | -1.90503300 |
| H  | -1.29460800 | 3.13260800  | -2.08808000 |
| Cl | 3.08231900  | -2.15478400 | -0.51173700 |
| Cl | -3.82646800 | -0.62345900 | -0.86202000 |

Entry: 4I-7I  
 $E^{\text{CP}}$  (a.u.): -1396.27593

|   |             |            |             |
|---|-------------|------------|-------------|
| C | -0.18085900 | 0.61671800 | -1.95409900 |
| C | 1.74033300  | 0.74038500 | -0.83397700 |
| H | -0.98139300 | 0.12504500 | -2.48474700 |
| C | 1.16370000  | 2.02973400 | -0.86978700 |
| C | 2.94262000  | 0.51385700 | -0.17805300 |
| C | 1.80438600  | 3.08671500 | -0.22833400 |
| C | 3.55739200  | 1.56850700 | 0.46526400  |
| H | 1.37324300  | 4.08087300 | -0.25321600 |
| C | 2.98725000  | 2.84728900 | 0.43823800  |
| H | 4.49562300  | 1.40883200 | 0.98041300  |
| H | 3.50113600  | 3.65650300 | 0.94097500  |
| C | -2.02835300 | 1.53887800 | 1.29149200  |
| C | -1.00419100 | 2.17859900 | 1.91904600  |
| C | -1.60696300 | 0.17489900 | 1.13155900  |
| H | -0.93664600 | 3.21721300 | 2.20274900  |
| N | 0.02024500  | 1.30789600 | 2.18733200  |
| C | -0.31382300 | 0.07493800 | 1.70459700  |

|   |             |             |            |
|---|-------------|-------------|------------|
| F | -3.63006900 | -0.19523200 | 0.80746400 |
| N | 0.62445600  | 0.39532000  | 1.84912500 |
| H | 0.23592700  | 1.25752500  | 2.18562700 |
| C | 0.75868500  | -1.78029700 | 1.30212900 |
| C | 0.50763800  | -3.23872900 | 1.21619900 |
| H | 0.24788000  | -3.52892400 | 0.19283400 |
| H | 1.38827000  | -3.82108800 | 1.49897300 |
| H | -0.31499400 | -3.54104400 | 1.86491700 |
| F | 2.23452300  | 2.54187300  | 0.65104300 |

Entry: 4Br-7Br  
 $E^{\text{CP}}$  (a.u.): -5952.96001

|    |             |             |             |
|----|-------------|-------------|-------------|
| C  | -0.18418800 | 0.55076700  | -1.96897600 |
| C  | 1.72266900  | 0.49462600  | -0.82600700 |
| H  | -1.00486500 | 0.13930100  | -2.53563900 |
| C  | 1.22443400  | 1.81458100  | -0.78500200 |
| C  | 2.89711400  | 0.16106300  | -0.16957700 |
| C  | 1.91483700  | 2.78809100  | -0.06611900 |
| C  | 3.56641300  | 1.12796800  | 0.54747600  |
| H  | 1.54167800  | 3.80497800  | -0.02876600 |
| C  | 3.07138200  | 2.43680600  | 0.59756900  |
| H  | 4.48455400  | 0.87134200  | 1.05885800  |
| H  | 3.62227600  | 3.18043900  | 1.15860900  |
| C  | -1.98059200 | 1.26836200  | 1.29158100  |
| C  | -0.94339600 | 1.79009200  | 2.00132700  |
| C  | -1.62430300 | -0.09460700 | 1.01853500  |
| H  | -0.82719000 | 2.79323800  | 2.38073200  |
| N  | 0.02474500  | 0.84134300  | 2.21538200  |
| C  | -0.36029400 | -0.32316100 | 1.61393500  |
| C  | -2.19139200 | -1.16115400 | 0.31950600  |
| H  | 0.94137100  | 1.01959400  | 2.58448300  |
| C  | 0.29843500  | -1.54231900 | 1.55144300  |
| C  | -1.54907100 | -2.37588100 | 0.23638100  |
| H  | 1.26337000  | -1.67967700 | 2.02362500  |
| C  | -0.31029400 | -2.56334000 | 0.85747200  |
| H  | -2.01235600 | -3.18757600 | -0.30831900 |
| H  | 0.17466100  | -3.52837200 | 0.78597500  |
| C  | -3.21243800 | 2.00891600  | 0.91257400  |
| H  | -3.34315700 | 2.05915300  | -0.17039300 |
| H  | -4.11265500 | 1.54167100  | 1.31582000  |
| H  | -3.16739500 | 3.03141800  | 1.29182900  |
| N  | 0.86252100  | -0.25249400 | -1.57351000 |
| H  | 0.87929800  | -1.25607100 | -1.62710700 |
| C  | 0.00509200  | 1.82428600  | -1.53177400 |
| C  | -0.86844500 | 3.00213800  | -1.74882500 |
| H  | -1.17097800 | 3.44571800  | -0.79511300 |
| H  | -0.36129800 | 3.78409600  | -2.31995000 |
| H  | -1.77436400 | 2.72864400  | -2.29111600 |
| Br | 3.55811900  | -1.61222400 | -0.27234200 |
| Br | -3.84953600 | -0.96244000 | -0.58839400 |

Entry: 5F-5F  
 $E^{\text{CP}}$  (a.u.): -1004.42492

|   |             |             |             |
|---|-------------|-------------|-------------|
| C | -1.99113000 | -0.89375100 | -2.10139200 |
| C | -0.69703700 | 0.86799700  | -1.64582900 |
| H | -2.34627100 | -1.73780800 | -2.67171000 |
| C | -1.62107800 | 0.71012500  | -0.59433700 |
| C | 0.25947200  | 1.87282700  | -1.64279200 |
| C | -1.57087800 | 1.57389600  | 0.50011300  |
| C | 0.30109700  | 2.71528200  | -0.55283500 |
| H | 0.96804400  | 1.98115600  | -2.45411900 |
| H | -2.24758300 | 1.48276400  | 1.34073800  |
| C | -0.59994700 | 2.54009000  | 0.49388700  |
| H | 1.03744900  | 3.50393700  | -0.47807900 |
| C | -0.21923100 | -1.95208000 | 1.37448300  |
| C | -0.45869700 | -1.20222800 | 2.48556800  |
| C | 0.89710900  | -1.34792800 | 0.71972100  |
| H | -1.22021200 | -1.33100100 | 3.23894100  |
| N | 0.45626100  | -0.17970600 | 2.57788400  |
| C | 1.29739900  | -0.24290300 | 1.49687200  |

|   |             |             |             |
|---|-------------|-------------|-------------|
| C | -2.13194300 | -0.98633400 | 0.55539700  |
| H | 0.93212700  | 1.56614200  | 2.51917300  |
| C | 0.41797500  | -1.10221100 | 1.73488300  |
| C | -1.41324000 | -2.16362200 | 0.57429200  |
| H | 1.40433500  | -1.13309600 | 2.18207200  |
| C | -0.14668000 | -2.21954500 | 1.16430100  |
| H | -1.83234300 | -3.05487000 | 0.12623800  |
| H | 0.39585700  | -3.15650100 | 1.16415500  |
| C | -3.30163300 | 2.19054200  | 0.88598400  |
| H | -3.46045700 | 2.14531300  | -0.19370700 |
| H | -4.17189900 | 1.72406000  | 1.35148300  |
| H | -3.29031900 | 3.24249400  | 1.17733900  |
| N | 0.91253000  | -0.09838500 | -1.51935100 |
| H | 1.00081200  | -1.09921600 | -1.53871400 |
| C | -0.06153800 | 1.92379600  | -1.59851100 |
| C | -1.00492700 | 3.03262200  | -1.87847400 |
| H | -1.31868800 | 3.52443200  | -0.95235300 |
| H | -0.55302200 | 3.79984000  | -2.51257700 |
| H | -1.90173400 | 2.66973700  | -2.38237100 |
| I | 3.80695000  | -1.39880700 | -0.18403700 |
| I | -3.99002800 | -1.00606000 | -0.43758000 |

Entry: 5Cl-5Cl  
 $E^{\text{CP}}$  (a.u.): -1725.14583

|    |             |             |             |
|----|-------------|-------------|-------------|
| C  | -0.36904100 | 2.57031800  | -1.83001900 |
| C  | 0.05562200  | 0.38324400  | -1.97332700 |
| H  | -0.92184400 | 3.48126700  | -1.99717600 |
| C  | 1.08837900  | 0.99137200  | -1.23149400 |
| C  | 0.02919200  | -0.98263300 | -2.21436100 |
| C  | 2.10761800  | 0.20383000  | -0.69919600 |
| C  | 1.04198100  | -1.74939700 | -1.68160000 |
| H  | -0.77606800 | -1.44211000 | -2.77399300 |
| H  | 2.90510900  | 0.63387700  | -0.10621500 |
| C  | 2.05120800  | -1.14927800 | -0.92635900 |
| H  | 1.05373700  | -2.82169900 | -1.82039000 |
| C  | -0.04205500 | 1.28423500  | 2.21483800  |
| C  | 1.06986700  | 0.66380900  | 2.69573800  |
| C  | -0.82623900 | 0.26495700  | 1.59194600  |
| H  | 1.90809700  | 1.08899600  | 3.22513600  |
| N  | 1.01470000  | -0.68647300 | 2.43485100  |
| C  | -0.13789400 | -0.95517100 | 1.74747200  |
| C  | -2.02486600 | 0.29171800  | 0.88152800  |
| H  | 1.76452500  | -1.33790700 | 2.57738300  |
| C  | -0.63223300 | -2.14777300 | 1.23988000  |
| C  | -2.48429100 | -0.89351300 | 0.36130500  |
| H  | -0.09244700 | -3.07884800 | 1.36107700  |
| C  | -1.82003400 | -2.10794700 | 0.54287200  |
| H  | -2.23825600 | -3.00784200 | 0.11299300  |
| C  | -0.40104000 | 2.71927900  | 2.31405400  |
| H  | -0.54744500 | 3.15713200  | 1.32215400  |
| H  | -1.33230600 | 2.86275300  | 2.86797700  |
| H  | 0.37779300  | 3.29106500  | 2.82029200  |
| N  | -0.81934200 | 1.37177200  | -2.33569300 |
| H  | -1.69133600 | 1.22852100  | -2.80977400 |
| C  | 0.80013200  | 2.38876100  | -1.15712200 |
| C  | 1.62699300  | 3.41296900  | -0.47512500 |
| H  | 1.78437000  | 3.15347900  | 0.57612300  |
| H  | 2.61515800  | 3.50520900  | -0.93314300 |
| H  | 1.15258600  | 4.39452800  | -0.50816300 |
| H  | -2.56641700 | 1.21527200  | 0.71869000  |
| Cl | 3.26143700  | -2.18800500 | -0.19194300 |
| Cl | -3.94158700 | -0.88572800 | -0.61589600 |

Entry: 5I-5I  
 $E^{\text{CP}}$  (a.u.): -1396.27582

|   |             |             |             |
|---|-------------|-------------|-------------|
| C | -0.88904000 | 2.73540800  | -1.99592400 |
| C | -0.12973400 | 0.63655600  | -1.93434200 |
| H | -1.59688400 | 3.52250900  | -2.20251800 |
| C | 0.85558500  | 1.48486000  | -1.39066600 |
| C | 0.04938200  | -0.73638400 | -2.02164300 |

|   |             |             |             |
|---|-------------|-------------|-------------|
| C | 1.57306800  | -1.63672700 | -0.46601600 |
| H | 0.43164700  | 0.56567000  | 3.24807300  |
| C | 2.36147700  | 0.56707900  | 1.12969800  |
| C | 2.61300200  | -0.81516800 | -0.81508000 |
| H | 2.65373200  | 1.41962200  | 1.73026900  |
| C | 3.02415100  | 0.26795500  | -0.04119200 |
| H | 3.85636900  | 0.86636500  | -0.38613400 |
| C | -0.95350000 | -3.15348200 | 0.90942200  |
| H | -1.40391400 | -2.98070700 | -0.07420900 |
| H | -0.29022400 | -4.01677800 | 0.81220100  |
| H | -1.75310500 | -3.42566900 | 1.59964700  |
| N | -0.95268900 | -0.11923500 | -2.56297100 |
| H | -0.39906300 | -0.31110400 | -3.37612900 |
| C | -2.44182800 | -0.41580300 | -0.90823500 |
| C | -3.54971300 | -0.94017400 | -0.07448100 |
| H | -3.20046300 | -1.18905800 | 0.93300500  |
| H | -4.35077000 | -0.20524700 | 0.04049600  |
| H | -3.98512100 | -1.84134000 | -0.50818700 |
| F | 3.26972500  | -1.04902600 | -1.96127500 |
| H | 1.28841800  | -2.46351700 | -1.10518600 |
| F | -0.48154200 | 3.34738900  | 1.56133500  |

Entry: 5Br-5Br  
 $E^{\text{CP}}$  (a.u.): -5952.95922

|    |             |             |             |
|----|-------------|-------------|-------------|
| C  | -0.80650800 | 2.51039600  | -2.00146100 |
| C  | -0.06705900 | 0.40499300  | -1.92994400 |
| H  | -1.50161800 | 3.30490600  | -2.22247900 |
| C  | 0.90990700  | 1.24181500  | -1.35425300 |
| C  | 0.10089500  | -0.96917600 | -2.01917400 |
| C  | 2.07038900  | 0.68080600  | -0.82485400 |
| C  | 1.25381200  | -1.51086500 | -1.49377600 |
| H  | -0.65784200 | -1.60440600 | -2.45916400 |
| H  | 2.82727500  | 1.29702600  | -0.35501600 |
| C  | 2.20796800  | -0.68459900 | -0.89473900 |
| H  | 1.41693200  | -2.57966200 | -1.52020500 |
| C  | -0.11221500 | 1.84327100  | 2.06622100  |
| C  | 1.10243400  | 1.44743300  | 2.53544600  |
| C  | -0.77634800 | 0.65378700  | 1.63480200  |
| H  | 1.90118500  | 2.04747600  | 2.94237300  |
| N  | 1.22483300  | 0.07854000  | 2.45075000  |
| C  | 0.08653800  | -0.43101700 | 1.88876600  |
| C  | -2.00247000 | 0.42669700  | 1.01306600  |
| H  | 2.06829800  | -0.44181000 | 2.61050400  |
| C  | -0.25743800 | -1.73492100 | 1.56278100  |
| C  | -2.31554700 | -0.86683000 | 0.67062800  |
| H  | 0.41640800  | -2.56051800 | 1.75579200  |
| C  | -1.47375200 | -1.94620900 | 0.95002500  |
| H  | -1.77446000 | -2.94424700 | 0.66132100  |
| C  | -0.66554500 | 3.21708200  | 1.99760900  |
| H  | -0.91443000 | 3.48696100  | 0.96619200  |
| H  | -1.58348500 | 3.30983000  | 2.58355900  |
| H  | 0.04482700  | 3.95396000  | 2.37459800  |
| N  | -1.10417900 | 1.20548900  | -2.32482300 |
| H  | -1.97895600 | 0.88025900  | -2.69228400 |
| C  | 0.42031100  | 2.58300600  | -1.41652000 |
| C  | 1.13418100  | 3.79012900  | -0.93554200 |
| H  | 1.40968300  | 3.68946700  | 0.11885000  |
| H  | 2.05962300  | 3.95983200  | -1.49191200 |
| H  | 0.51792500  | 4.68452400  | -1.03448100 |
| H  | -2.67523800 | 1.24419300  | 0.78547200  |
| Br | 3.72655500  | -1.50182100 | -0.08522900 |
| Br | -3.93449800 | -1.20248700 | -0.27474600 |

Entry: 5F-6F  
 $E^{\text{CP}}$  (a.u.): -1004.42701

|   |             |             |            |
|---|-------------|-------------|------------|
| C | -0.00846200 | 1.05805500  | 2.01447600 |
| C | -1.37854000 | -0.44226000 | 1.08976800 |
| H | 0.85068300  | 1.39051200  | 2.57520300 |
| C | -1.83390600 | 0.84832900  | 0.74870100 |
| C | -2.01101200 | -1.59298300 | 0.63430800 |

|   |             |             |             |
|---|-------------|-------------|-------------|
| C | 2.03605900  | 0.93730000  | -0.89205900 |
| C | 1.22219200  | -1.26412500 | -1.52645800 |
| H | -0.71215300 | -1.38219100 | -2.44081700 |
| H | 2.79341700  | 1.57121500  | -0.44602100 |
| C | 2.18972900  | -0.42893400 | -0.95638300 |
| H | 1.38615500  | -2.33307200 | -1.55655300 |
| C | -0.05064000 | 2.11744500  | 2.05001700  |
| C | 1.19302200  | 1.76311600  | 2.47356000  |
| C | -0.69891100 | 0.90251500  | 1.66669900  |
| H | 1.99119000  | 2.39162000  | 2.83645500  |
| N | 1.34942200  | 0.39637000  | 2.40833700  |
| C | 0.20390100  | -0.15337400 | 1.90246200  |
| C | -1.94382000 | 0.63060100  | 1.10260000  |
| H | 2.21569700  | -0.09701600 | 2.53275300  |
| C | -0.11781700 | -1.47204800 | 1.61567200  |
| C | -2.24296600 | -0.67837800 | 0.79884800  |
| H | 0.58628900  | -2.27548700 | 1.79431100  |
| C | -1.35428000 | -1.72698100 | 1.06184000  |
| H | -1.63343100 | -2.74154400 | 0.81079300  |
| C | -0.64360900 | 3.47473500  | 1.98360300  |
| H | -0.93653400 | 3.72422900  | 0.95865700  |
| H | -1.54209700 | 3.55043600  | 2.60124700  |
| H | 0.05928300  | 4.23526100  | 2.32608900  |
| N | -1.18461100 | 1.42554400  | -2.30260000 |
| H | -2.05635600 | 1.09483300  | -2.67210800 |
| C | 0.35268000  | 2.82173100  | -1.44575800 |
| C | 1.06928000  | 4.03796000  | -0.99233900 |
| H | 1.37383400  | 3.94895800  | 0.05514100  |
| H | 1.97808400  | 4.20985500  | -1.57477700 |
| H | 0.44360200  | 4.92671300  | -1.08238400 |
| H | -2.63962000 | 1.43344600  | 0.88891800  |
| I | -4.06637000 | -1.11991000 | -0.16037100 |
| I | 3.88768600  | -1.31452700 | -0.07675600 |

Entry: 5Cl-6Cl

$E^{\text{CP}}$  (a.u.): -1725.14485

|   |             |             |             |
|---|-------------|-------------|-------------|
| C | -0.30165300 | 1.54368300  | -1.96048400 |
| C | 1.11880000  | -0.02757600 | -1.26437400 |
| H | -1.20512500 | 1.92591800  | -2.40901200 |
| C | 1.64579500  | 1.23314600  | -0.91795800 |
| C | 1.75193400  | -1.21300600 | -0.92040400 |
| C | 2.84828700  | 1.29841800  | -0.21722300 |
| C | 2.92357000  | -1.10092500 | -0.20818400 |
| H | 1.34087100  | -2.18149800 | -1.17191900 |
| H | 3.27415400  | 2.25773700  | 0.05342400  |
| C | 3.48552400  | 0.13053300  | 0.14200400  |
| H | 4.41809200  | 0.14587600  | 0.68923200  |
| C | -1.16701300 | 1.65665300  | 1.62590000  |
| C | 0.03724500  | 1.38207000  | 2.19704800  |
| C | -1.64216600 | 0.42027300  | 1.09041900  |
| H | 0.72189700  | 2.05206200  | 2.69299300  |
| N | 0.33466200  | 0.04512400  | 2.06837000  |
| C | -0.67549300 | -0.56462400 | 1.37676700  |
| C | -2.77815600 | 0.07490600  | 0.35893200  |
| H | 1.22070400  | -0.37495000 | 2.28472700  |
| C | -0.82015200 | -1.88014500 | 0.96152700  |
| C | -2.89972500 | -1.22850400 | -0.06000400 |
| H | -0.07006900 | -2.62781400 | 1.19028000  |
| C | -1.94352400 | -2.20708300 | 0.23191700  |
| H | -2.10341200 | -3.21909900 | -0.11432400 |
| C | -1.85457700 | 2.96686600  | 1.53364500  |
| H | -2.00850000 | 3.25732500  | 0.48957100  |
| H | -2.83948700 | 2.94288300  | 2.00664200  |
| H | -1.27479400 | 3.75522100  | 2.01448300  |
| N | -0.06049800 | 0.18714800  | -1.91874900 |
| H | -0.72772600 | -0.52641300 | -2.15212000 |
| C | 0.71889600  | 2.22203500  | -1.37218400 |
| C | 0.85260000  | 3.68564500  | -1.18018900 |
| H | 0.90819400  | 3.93294800  | -0.11536400 |
| H | 1.76047100  | 4.07657400  | -1.64636700 |
| H | 0.00372100  | 4.22357900  | -1.60291400 |

|   |             |             |             |
|---|-------------|-------------|-------------|
| C | -2.95069800 | 0.98205700  | -0.07222100 |
| C | -3.10255800 | -1.40507700 | -0.17902600 |
| H | -1.68436900 | -2.59105600 | 0.89432000  |
| H | -3.31680500 | 1.96535100  | -0.34358400 |
| C | -3.58405300 | -0.14903700 | -0.54341500 |
| H | -4.45615700 | -0.09354700 | -1.18044600 |
| C | 1.36800500  | 1.49159000  | -1.41450700 |
| C | 0.22526300  | 1.11567300  | -2.05115000 |
| C | 1.89651600  | 0.30796700  | -0.81536800 |
| H | -0.47684200 | 1.72292800  | -2.60098800 |
| N | 0.01894100  | -0.23587200 | -1.91002400 |
| C | 1.02216000  | -0.75229200 | -1.13114800 |
| C | 3.01424100  | 0.06373900  | -0.01605600 |
| H | -0.83567400 | -0.71308100 | -2.13533700 |
| C | 1.23905100  | -2.04348100 | -0.67377000 |
| C | 3.20140900  | -1.21729300 | 0.43623100  |
| H | 0.56578000  | -2.85142200 | -0.93181400 |
| C | 2.34144300  | -2.26995300 | 0.12566700  |
| H | 2.56905300  | -3.25601900 | 0.50747300  |
| C | 1.95478300  | 2.85049600  | -1.32466500 |
| H | 2.05367900  | 3.17142600  | -0.28314000 |
| H | 2.95416000  | 2.89197400  | -1.76551400 |
| H | 1.33519400  | 3.58551300  | -1.83937100 |
| N | -0.27875000 | -0.28989900 | 1.88319400  |
| H | 0.34349200  | -1.03035000 | 2.15285700  |
| C | -0.93871200 | 1.78955500  | 1.34905000  |
| C | -1.01413600 | 3.26314300  | 1.21037500  |
| H | -0.97148200 | 3.55610100  | 0.15651700  |
| H | -1.94723100 | 3.66407500  | 1.61472100  |
| H | -0.18885500 | 3.75554800  | 1.72550800  |
| F | 4.26049700  | -1.48658700 | 1.21029700  |
| H | 3.71743600  | 0.84273300  | 0.25060600  |
| F | -3.74251600 | -2.48226400 | -0.64726400 |

Entry: 5Br-6Br

$E^{\text{CP}}$  (a.u.): -5952.95752

|   |             |             |             |
|---|-------------|-------------|-------------|
| C | -0.50089200 | 1.92905400  | -1.95278900 |
| C | 1.02694200  | 0.42224300  | -1.35087500 |
| H | -1.44846400 | 2.27213700  | -2.33735700 |
| C | 1.52828300  | 1.70599200  | -1.05376100 |
| C | 1.72591600  | -0.73507900 | -1.03991800 |
| C | 2.76940000  | 1.82370000  | -0.43136900 |
| C | 2.93128600  | -0.57304500 | -0.39677300 |
| H | 1.33198700  | -1.71891400 | -1.25781000 |
| H | 3.17675000  | 2.80116400  | -0.19944900 |
| C | 3.46770800  | 0.68355400  | -0.09533700 |
| H | 4.42931100  | 0.74538200  | 0.39586000  |
| C | -1.04516100 | 2.07405700  | 1.70441200  |
| C | 0.22439400  | 1.90329300  | 2.16306400  |
| C | -1.48161200 | 0.78754600  | 1.26140400  |
| H | 0.90840000  | 2.63706700  | 2.56009100  |
| N | 0.59889000  | 0.58331800  | 2.05812700  |
| C | -0.42716300 | -0.11885700 | 1.48918300  |
| C | -2.65598100 | 0.33896600  | 0.65697500  |
| H | 1.53610100  | 0.23894900  | 2.17102000  |
| C | -0.52170900 | -1.45871800 | 1.14257000  |
| C | -2.72720200 | -0.98639900 | 0.29737700  |
| H | 0.29559900  | -2.14608800 | 1.32642900  |
| C | -1.68290500 | -1.88679000 | 0.53466800  |
| H | -1.79926000 | -2.92182700 | 0.24403600  |
| C | -1.83147100 | 3.32893000  | 1.63828500  |
| H | -2.09866400 | 3.57145500  | 0.60494900  |
| H | -2.76661600 | 3.25138300  | 2.19852700  |
| H | -1.27162900 | 4.17237000  | 2.04313500  |
| N | -0.20399800 | 0.58405900  | -1.92002700 |
| H | -0.85700600 | -0.15789500 | -2.09836600 |
| C | 0.53342500  | 2.65349600  | -1.44873300 |
| C | 0.62109500  | 4.12357700  | -1.27964900 |
| H | 0.75452100  | 4.38569100  | -0.22532300 |
| H | 1.46971100  | 4.54620500  | -1.82322200 |
| H | -0.28254400 | 4.62082200  | -1.63317600 |

|    |             |             |             |
|----|-------------|-------------|-------------|
| H  | -3.54046500 | 0.80500600  | 0.11704000  |
| Cl | -4.29991100 | -1.69600100 | -1.00335700 |
| Cl | 3.73527500  | -2.56431900 | 0.30472900  |

Entry: 5I-6I  
 $E^{\text{CP}}$  (a.u.): -1396.27359

|   |             |             |             |
|---|-------------|-------------|-------------|
| C | -0.70255300 | 2.11886900  | -1.94909900 |
| C | 0.93718100  | 0.71682300  | -1.38780500 |
| H | -1.68597100 | 2.39682300  | -2.29449000 |
| C | 1.37813700  | 2.03482600  | -1.15270200 |
| C | 1.72030400  | -0.38843900 | -1.08583100 |
| C | 2.64240200  | 2.24185800  | -0.60532200 |
| C | 2.95145700  | -0.14299200 | -0.51751300 |
| H | 1.36702800  | -1.39690100 | -1.25887400 |
| H | 3.00312400  | 3.24787000  | -0.42286800 |
| C | 3.42531800  | 1.15468000  | -0.28148500 |
| H | 4.40561600  | 1.29560700  | 0.15419900  |
| C | -0.95113300 | 2.38219500  | 1.77440000  |
| C | 0.34432700  | 2.25168700  | 2.16919900  |
| C | -1.37639200 | 1.07660700  | 1.37816800  |
| H | 1.02808200  | 3.00872400  | 2.52013300  |
| N | 0.74650600  | 0.93935500  | 2.06700900  |
| C | -0.28979800 | 0.20033300  | 1.56891100  |
| C | -2.56589100 | 0.58950700  | 0.83797700  |
| H | 1.69345400  | 0.61542500  | 2.15470500  |
| C | -0.37107800 | -1.14901200 | 1.25731500  |
| C | -2.62810500 | -0.74491600 | 0.50328900  |
| H | 0.46948700  | -1.81444500 | 1.41583000  |
| C | -1.54988500 | -1.61552500 | 0.71402900  |
| H | -1.64524600 | -2.66077600 | 0.45107800  |
| C | -1.78032800 | 3.61087500  | 1.74321200  |
| H | -2.14336800 | 3.81746600  | 0.73175800  |
| H | -2.66143700 | 3.51856200  | 2.38321000  |
| H | -1.21732100 | 4.48182700  | 2.07953500  |
| N | -0.32966400 | 0.79435800  | -1.89340200 |
| H | -0.94349400 | 0.01365000  | -2.04228800 |
| C | 0.31386600  | 2.91405100  | -1.51973600 |
| C | 0.33476000  | 4.39222400  | -1.41007600 |
| H | 0.52216700  | 4.70505200  | -0.37809900 |
| H | 1.12379100  | 4.83298500  | -2.02450300 |
| H | -0.61364000 | 4.82967000  | -1.72295500 |
| H | -3.40893500 | 1.25028000  | 0.67403400  |
| I | -4.38008300 | -1.50525400 | -0.38587800 |
| I | 4.13089900  | -1.78040100 | 0.08668500  |

Entry: 5Cl-7Cl  
 $E^{\text{CP}}$  (a.u.): -1725.14689

|   |             |             |             |
|---|-------------|-------------|-------------|
| C | -0.38233900 | 0.61559300  | 2.16537900  |
| C | -1.59437300 | -0.65533000 | 0.80425100  |
| H | 0.41056600  | 0.83499800  | 2.86256000  |
| C | -2.10570400 | 0.65709400  | 0.74566800  |
| C | -2.14804100 | -1.66718200 | 0.03621200  |
| C | -3.17285100 | 0.94093800  | -0.10507500 |
| C | -3.19330600 | -1.37707400 | -0.81000700 |
| H | -3.57644400 | 1.94535000  | -0.15960400 |
| C | -3.70055900 | -0.07257000 | -0.87688300 |
| H | -3.62545300 | -2.16795900 | -1.40789000 |
| H | -4.53207900 | 0.12771900  | -1.53986300 |
| C | 0.95929800  | 2.37485500  | -0.93846900 |
| C | -0.16633000 | 2.19126100  | -1.67974300 |
| C | 1.54023400  | 1.07993800  | -0.77224200 |
| H | -0.89428800 | 2.91977400  | -2.00193800 |
| N | -0.31191700 | 0.86394300  | -2.01260800 |
| C | 0.71205700  | 0.15608000  | -1.44140200 |
| C | 2.67072900  | 0.62675400  | -0.09427100 |
| H | -1.15431300 | 0.45684900  | -2.37991500 |
| C | 0.98818300  | -1.20283200 | -1.44955700 |
| C | 2.92338400  | -0.72478800 | -0.10150300 |
| H | 0.34677200  | -1.90754900 | -1.96421500 |
| C | 2.10331600  | -1.63989800 | -0.76650000 |

|    |             |             |             |
|----|-------------|-------------|-------------|
| H  | -3.48171300 | 1.01313500  | 0.46513700  |
| Br | 3.88213700  | -2.12405700 | 0.15349800  |
| Br | -4.29318900 | -1.63525100 | -0.56588700 |

Entry: 5F-7F  
 $E^{\text{CP}}$  (a.u.): -1004.42638

|   |             |             |             |
|---|-------------|-------------|-------------|
| C | -0.32331800 | 0.61057500  | 2.15393600  |
| C | -1.47830300 | -0.76366200 | 0.84745600  |
| H | 0.44106400  | 0.88863100  | 2.86206400  |
| C | -1.98285500 | 0.53587300  | 0.65894200  |
| C | -1.99325300 | -1.82568500 | 0.12444000  |
| C | -3.01123800 | 0.75260100  | -0.26040300 |
| C | -2.99464500 | -1.61263800 | -0.78843400 |
| H | -3.40779000 | 1.74959500  | -0.41147400 |
| C | -3.50366100 | -0.31786300 | -0.97358800 |
| H | -3.38833500 | -2.45558000 | -1.34028500 |
| H | -4.30339600 | -0.17086900 | -1.68756700 |
| C | 1.14191000  | 1.89811900  | -1.09146000 |
| C | 0.06837200  | 1.56823900  | -1.86009000 |
| C | 1.74373800  | 0.66344900  | -0.69936100 |
| H | -0.65688400 | 2.21676200  | -2.32671200 |
| N | -0.02247900 | 0.20411400  | -2.00112700 |
| C | 0.98158800  | -0.37744400 | -1.26776500 |
| C | 2.84374800  | 0.35536200  | 0.10243400  |
| H | -0.83839200 | -0.27799600 | -2.33690200 |
| C | 1.28668700  | -1.71268600 | -1.04931300 |
| C | 3.12016300  | -0.97125700 | 0.31277400  |
| H | 0.69833100  | -2.50664000 | -1.49143800 |
| C | 2.36727500  | -2.00482700 | -0.24183900 |
| H | 2.65738800  | -3.02654800 | -0.03780100 |
| C | 1.60583000  | 3.25319600  | -0.70803100 |
| H | 1.68580800  | 3.35269900  | 0.37896700  |
| H | 2.59454000  | 3.47658800  | -1.11765800 |
| H | 0.91946400  | 4.02369000  | -1.06176400 |
| N | -0.47987600 | -0.70379400 | 1.77494000  |
| H | 0.13741500  | -1.46117400 | 2.00457000  |
| C | -1.22373800 | 1.39998100  | 1.50778700  |
| C | -1.37491000 | 2.87198100  | 1.59630000  |
| H | -1.16579900 | 3.33925900  | 0.62815700  |
| H | -2.38932200 | 3.16060900  | 1.88208000  |
| H | -0.68699500 | 3.30084400  | 2.32546600  |
| F | 4.16378200  | -1.30456800 | 1.08359000  |
| H | 3.46453100  | 1.11979900  | 0.55249900  |
| F | -1.48439100 | -3.04785400 | 0.31400900  |

Entry: 5Br-7Br  
 $E^{\text{CP}}$  (a.u.): -5952.95982

|   |             |             |             |
|---|-------------|-------------|-------------|
| C | -0.46487700 | 0.91233500  | 2.16115000  |
| C | -1.80470900 | -0.25099300 | 0.82015300  |
| H | 0.38006300  | 1.07085300  | 2.81207600  |
| C | -2.27931400 | 1.07727800  | 0.87188500  |
| C | -2.44552700 | -1.20306700 | 0.04229100  |
| C | -3.39564400 | 1.43799400  | 0.12037500  |
| C | -3.54155700 | -0.83393900 | -0.70554800 |
| H | -3.76922600 | 2.45491100  | 0.15293700  |
| C | -4.01033300 | 0.48560800  | -0.66444200 |
| H | -4.04665700 | -1.57378900 | -1.31196100 |
| H | -4.88127200 | 0.74615300  | -1.25176000 |
| C | 0.64721600  | 2.84538800  | -0.97743300 |
| C | -0.52452400 | 2.69668600  | -1.65192200 |
| C | 1.22662800  | 1.54123600  | -0.89734900 |
| H | -1.26549300 | 3.44120900  | -1.89874600 |
| N | -0.70157700 | 1.38364200  | -2.02473200 |
| C | 0.35081100  | 0.64865900  | -1.54841000 |
| C | 2.39115400  | 1.05408500  | -0.30581300 |
| H | -1.56612800 | 0.99640000  | -2.36039900 |
| C | 0.61514100  | -0.71032900 | -1.62758200 |
| C | 2.63056500  | -0.29871400 | -0.37658500 |
| H | -0.06174100 | -1.39107400 | -2.12951200 |
| C | 1.76458600  | -1.18101100 | -1.02853500 |

|    |             |             |             |
|----|-------------|-------------|-------------|
| H  | 2.3555800   | -2.69109400 | -0.74055300 |
| C  | 1.48800800  | 3.64206800  | -0.37934300 |
| H  | 1.60226800  | 3.57419800  | 0.70722400  |
| H  | 2.47254200  | 3.88715400  | -0.78587800 |
| H  | 0.82300100  | 4.47996800  | -0.59186000 |
| N  | -0.55425700 | -0.66214300 | 1.68197700  |
| H  | 0.04175500  | -1.45140600 | 1.85573800  |
| C  | -1.31209000 | 1.45231900  | 1.62980200  |
| C  | -1.46704200 | 2.90949700  | 1.85545400  |
| H  | -1.27643200 | 3.46948800  | 0.93342300  |
| H  | -2.47830300 | 3.16231200  | 2.18325000  |
| H  | -0.77077800 | 3.27223800  | 2.61199300  |
| H  | 3.33142200  | 1.30829500  | 0.42679400  |
| Cl | -1.49436600 | -3.27947800 | 0.15376900  |
| Cl | 4.32566000  | -1.33659700 | 0.75061600  |

Entry: 5I-7I

$E^{\text{CP}}$  (a.u.): -1396.27599

|   |             |             |             |
|---|-------------|-------------|-------------|
| C | -0.43686700 | 1.19718700  | 2.14332600  |
| C | -1.96610700 | 0.20754900  | 0.86151400  |
| H | 0.45980300  | 1.25242200  | 2.73984000  |
| C | -2.30514100 | 1.57375400  | 0.98269900  |
| C | -2.74192400 | -0.65560000 | 0.09963900  |
| C | -3.42411300 | 2.06631100  | 0.31573400  |
| C | -3.84149900 | -0.15005000 | -0.56284300 |
| H | -3.69354300 | 3.11271300  | 0.40215700  |
| C | -4.17645100 | 1.20562500  | -0.45476900 |
| H | -4.45827300 | -0.81013200 | -1.15853700 |
| H | -5.05186200 | 1.56837100  | -0.97789900 |
| C | 0.61564400  | 3.19165400  | -1.02322300 |
| C | -0.58685000 | 3.13421200  | -1.65666800 |
| C | 1.10528800  | 1.84924800  | -0.98056100 |
| H | -1.28300100 | 3.93096000  | -1.86762700 |
| N | -0.86747600 | 1.84158000  | -2.03639600 |
| C | 0.14846600  | 1.02945000  | -1.61187500 |
| C | 2.25292200  | 1.27328400  | -0.43782000 |
| H | -1.75592900 | 1.52144400  | -2.37861800 |
| C | 0.31840300  | -0.34202900 | -1.72414700 |
| C | 2.40288000  | -0.09304900 | -0.53578600 |
| H | -0.41771900 | -0.96578300 | -2.21694900 |
| C | 1.45461700  | -0.89971900 | -1.17604700 |
| H | 1.61035100  | -1.96884200 | -1.23725300 |
| C | 1.29936500  | 4.38370900  | -0.46675400 |
| H | 1.54918400  | 4.24054200  | 0.58895700  |
| H | 2.23849600  | 4.59255100  | -0.98592300 |
| H | 0.67415900  | 5.27408100  | -0.54245700 |
| N | -0.82935600 | 0.00209900  | 1.58425000  |
| H | -0.32177700 | -0.86424000 | 1.62500800  |
| C | -1.31346500 | 2.18292100  | 1.81201800  |
| C | -1.27158400 | 3.61440700  | 2.19576200  |
| H | -1.20051800 | 4.25595300  | 1.31192100  |
| H | -2.17350200 | 3.91260300  | 2.73637100  |
| H | -0.41499100 | 3.83170000  | 2.83413600  |
| H | 2.99952500  | 1.88499500  | 0.05433900  |
| I | 4.09319000  | -1.01189000 | 0.32125700  |
| I | -2.24572000 | -2.69166200 | -0.02774000 |

Entry: 6Cl-6Cl

$E^{\text{CP}}$  (a.u.): -1725.14579

|   |             |             |             |
|---|-------------|-------------|-------------|
| C | 0.28262800  | 2.55328800  | -1.29709600 |
| C | 0.97558400  | 0.43622300  | -1.22244300 |
| H | -0.40613400 | 3.35743900  | -1.50158600 |
| C | 1.98936300  | 1.25349900  | -0.68191100 |
| C | 1.09177000  | -0.94429700 | -1.28431000 |
| C | 3.15722800  | 0.66268700  | -0.20440300 |
| C | 2.24946000  | -1.48330700 | -0.77541600 |
| H | 0.31199400  | -1.57282600 | -1.69386300 |
| H | 3.95382600  | 1.27168000  | 0.20676700  |
| C | 3.28354700  | -0.70906100 | -0.24502100 |
| H | 4.17050300  | -1.20114800 | 0.12939100  |

|    |             |             |             |
|----|-------------|-------------|-------------|
| H  | 2.00195200  | -2.23585900 | -1.05881200 |
| C  | 1.21997400  | 4.08941800  | -0.40957400 |
| H  | 1.41753400  | 3.98108400  | 0.66134100  |
| H  | 2.17122700  | 4.35114500  | -0.88008200 |
| H  | 0.54250000  | 4.93432700  | -0.53831100 |
| N  | -0.70495100 | -0.32987600 | 1.61875200  |
| H  | -0.13169300 | -1.14669300 | 1.73099400  |
| C  | -1.40554600 | 1.80067600  | 1.74112700  |
| C  | -1.51171500 | 3.24159000  | 2.07347100  |
| H  | -1.43740300 | 3.85742600  | 1.17183900  |
| H  | -2.46796500 | 3.47769400  | 2.54702600  |
| H  | -0.71824100 | 3.55245100  | 2.75350300  |
| H  | 3.08285500  | 1.71562900  | 0.20098600  |
| Br | 4.19072100  | -1.00983600 | 0.44660800  |
| Br | -1.79582400 | -2.98232500 | 0.02245500  |

Entry: 6F-6F

$E^{\text{CP}}$  (a.u.): -1004.42701

|   |             |             |             |
|---|-------------|-------------|-------------|
| C | -0.88297700 | -2.42028500 | -1.02770400 |
| C | -1.00951600 | -0.20063300 | -1.20644900 |
| H | -0.43747700 | -3.39444000 | -1.15259600 |
| C | -2.15698700 | -0.65599400 | -0.52609500 |
| C | -0.77144300 | 1.14710600  | -1.43612500 |
| C | -3.09406100 | 0.26979300  | -0.07283000 |
| C | -1.71036100 | 2.01685000  | -0.94367600 |
| H | 0.11186600  | 1.51173100  | -1.94369400 |
| H | -3.98519000 | -0.06104500 | 0.44757900  |
| C | -2.86501200 | 1.61379800  | -0.27761500 |
| H | -3.55594700 | 2.37050800  | 0.06831000  |
| C | 0.22422200  | 0.31112000  | 2.01513100  |
| C | 0.15288700  | 1.65555600  | 1.84208600  |
| C | 1.31585800  | -0.13931600 | 1.20579200  |
| H | -0.54321500 | 2.36239500  | 2.26429100  |
| N | 1.14412300  | 2.07801200  | 0.97741100  |
| C | 1.85415400  | 0.99149400  | 0.55528500  |
| C | 1.86615400  | -1.39363500 | 0.95735400  |
| H | 1.23140700  | 3.00885400  | 0.61434200  |
| C | 2.90823500  | 0.89404900  | -0.34578000 |
| C | 2.91676300  | -1.50914200 | 0.07050000  |
| H | 3.33632800  | 1.74690100  | -0.85534800 |
| C | 3.40990900  | -0.36792100 | -0.55941100 |
| C | -0.66081100 | -0.54901800 | 2.83699400  |
| H | -1.11587300 | -1.33118900 | 2.22105300  |
| H | -0.11377400 | -1.04796600 | 3.64118600  |
| H | -1.46704000 | 0.03004100  | 3.28792300  |
| C | -2.05395800 | -2.08148400 | -0.42711700 |
| C | -3.04860300 | -2.98174900 | 0.20546700  |
| H | -3.23371800 | -2.70200800 | 1.24693400  |
| H | -4.01352600 | -2.93939100 | -0.30653400 |
| H | -2.71242300 | -4.01850700 | 0.19459300  |
| N | -0.26129800 | -1.29577500 | -1.53276100 |
| H | 0.70115900  | -1.25965700 | -1.82074400 |
| H | 1.46625400  | -2.27238400 | 1.44958500  |
| F | 4.42763400  | -0.51294400 | -1.41417000 |
| H | 3.38160000  | -2.46178500 | -0.14476900 |
| F | -1.49395900 | 3.33280600  | -1.08799700 |

Entry: 6Br-6Br

$E^{\text{CP}}$  (a.u.): -5952.95850

|   |             |             |             |
|---|-------------|-------------|-------------|
| C | 0.12401600  | 2.83463800  | -1.46626800 |
| C | 1.01139000  | 0.80791400  | -1.20931700 |
| H | -0.65226800 | 3.54967500  | -1.68810600 |
| C | 1.99555300  | 1.76511100  | -0.88896600 |
| C | 1.24150600  | -0.55535000 | -1.09987900 |
| C | 3.25024200  | 1.33433200  | -0.46274300 |
| C | 2.48431100  | -0.93245200 | -0.64835300 |
| H | 0.47555000  | -1.28505600 | -1.32895800 |
| H | 4.02502500  | 2.05184100  | -0.21916900 |
| C | 3.49177000  | -0.01676000 | -0.33535000 |
| H | 4.45120600  | -0.37923400 | 0.00793000  |

|    |             |             |             |
|----|-------------|-------------|-------------|
| C  | 0.16077400  | 0.08878000  | 2.16390800  |
| C  | 0.52126400  | -1.21873500 | 2.08174000  |
| C  | -1.06848600 | 0.20950300  | 1.44355700  |
| H  | 1.39770600  | -1.71062000 | 2.47312800  |
| N  | -0.41670100 | -1.92894500 | 1.36327300  |
| C  | -1.38908300 | -1.06865500 | 0.93812700  |
| C  | -1.90930500 | 1.28239700  | 1.15839100  |
| H  | -0.31243400 | -2.88373900 | 1.07281700  |
| C  | -2.50188400 | -1.28978300 | 0.13780700  |
| C  | -3.02151800 | 1.08005900  | 0.36910900  |
| H  | -2.74956300 | -2.26482900 | -0.25984700 |
| C  | -3.29473700 | -0.19536100 | -0.13143400 |
| C  | 0.90010900  | 1.19563500  | 2.81698800  |
| H  | 1.10237400  | 1.99617800  | 2.09814900  |
| H  | 0.33615100  | 1.63620200  | 3.64295800  |
| H  | 1.85830600  | 0.85219300  | 3.20778700  |
| C  | 1.52441200  | 2.60507600  | -0.74439800 |
| C  | 2.27627500  | 3.80442400  | -0.30059400 |
| H  | 2.58028600  | 3.71965500  | 0.74674000  |
| H  | 3.19078700  | 3.94402300  | -0.88278100 |
| H  | 1.67829400  | 4.71008200  | -0.40086700 |
| N  | -0.04547200 | 1.25413100  | -1.61702800 |
| H  | -0.96532300 | 0.94073600  | -1.87266800 |
| H  | -1.68415700 | 2.27084400  | 1.54164100  |
| H  | -3.69534900 | 1.89183700  | 0.13211400  |
| Cl | -4.70730100 | -0.40814200 | -1.13995400 |
| Cl | 2.41927300  | -3.22763800 | -0.75411700 |

Entry: 6I-6I

$E^{\text{CP}}$  (a.u.): -1396.27448

|   |             |             |             |
|---|-------------|-------------|-------------|
| C | -0.08122300 | 3.03685800  | -1.55823600 |
| C | 1.03346800  | 1.13713200  | -1.22288400 |
| H | -0.93667800 | 3.64846700  | -1.79765300 |
| C | 1.90994400  | 2.21371800  | -0.97978300 |
| C | 1.41961200  | -0.18435800 | -1.05392700 |
| C | 3.21536400  | 1.94912900  | -0.57195300 |
| C | 2.71113100  | -0.40210800 | -0.62618500 |
| H | 0.73116600  | -1.00125700 | -1.23067800 |
| H | 3.91025000  | 2.76023900  | -0.38728100 |
| C | 3.61243400  | 0.64171900  | -0.38926000 |
| H | 4.61752000  | 0.41662700  | -0.05899200 |
| C | 0.54589600  | 1.38104000  | 2.24811100  |
| C | 1.19582800  | 0.19626500  | 2.39424300  |
| C | -0.71931100 | 1.07016900  | 1.66116900  |
| H | 2.18596800  | 0.00589500  | 2.77782400  |
| N | 0.40907600  | -0.84105100 | 1.94375200  |
| C | -0.76300200 | -0.32658000 | 1.46394800  |
| C | -1.80254200 | 1.84675800  | 1.25877400  |
| H | 0.72349400  | -1.78869800 | 1.83148200  |
| C | -1.84144300 | -0.95346000 | 0.85351500  |
| C | -2.88282200 | 1.23990200  | 0.65289900  |
| H | -1.86394600 | -2.02487000 | 0.69933700  |
| C | -2.88722400 | -0.14622600 | 0.45145200  |
| C | 1.04186500  | 2.73722700  | 2.58397400  |
| H | 1.02148600  | 3.38498700  | 1.70148800  |
| H | 0.42984700  | 3.21817100  | 3.35128700  |
| H | 2.06909100  | 2.70321000  | 2.94767100  |
| C | 1.17550600  | 3.42007600  | -1.20398900 |
| C | 1.70901200  | 4.79893200  | -1.08137000 |
| H | 2.15030000  | 4.96960000  | -0.09512300 |
| H | 2.49512500  | 4.99309300  | -1.81563900 |
| H | 0.92717200  | 5.54396600  | -1.22868800 |
| N | -0.16916200 | 1.66345900  | -1.60571800 |
| H | -1.03136300 | 1.14781500  | -1.64615100 |
| H | -1.79058200 | 2.92049600  | 1.40771200  |
| H | -3.73326600 | 1.82901100  | 0.33544600  |
| I | 3.32165800  | -2.37861000 | -0.23301400 |
| I | -4.55071400 | -1.02555600 | -0.49229300 |

Entry: 6Cl-7Cl

$E^{\text{CP}}$  (a.u.): -1725.14811

|    |             |             |             |
|----|-------------|-------------|-------------|
| C  | 0.45212900  | 0.85374400  | 2.25957600  |
| C  | 0.99288100  | -0.39085300 | 2.33733000  |
| C  | -0.81003300 | 0.69851500  | 1.60697000  |
| H  | 1.94674100  | -0.69682100 | 2.73729500  |
| N  | 0.13853000  | -1.32007900 | 1.78377800  |
| C  | -0.96219900 | -0.67073000 | 1.30105100  |
| C  | -1.81150700 | 1.59219800  | 1.23654100  |
| H  | 0.38187000  | -2.27650600 | 1.59661400  |
| C  | -2.06425000 | -1.15503500 | 0.60908100  |
| C  | -2.91717200 | 1.12731300  | 0.55509900  |
| H  | -2.17777900 | -2.20328200 | 0.36608500  |
| C  | -3.02135900 | -0.23213600 | 0.24509400  |
| C  | 1.04528100  | 2.13345200  | 2.71646000  |
| H  | 1.16394700  | 2.82546900  | 1.87659100  |
| H  | 0.41600900  | 2.63175100  | 3.45829600  |
| H  | 2.02816500  | 1.97821300  | 3.16195500  |
| C  | 1.40512800  | 3.05614100  | -1.06563000 |
| C  | 2.07902900  | 4.36089000  | -0.85539500 |
| H  | 2.49121300  | 4.44027000  | 0.15469500  |
| H  | 2.91362000  | 4.49928000  | -1.54744900 |
| H  | 1.38883400  | 5.19218400  | -0.99863300 |
| N  | -0.11389600 | 1.48362500  | -1.59047700 |
| H  | -1.02673700 | 1.06976600  | -1.67171100 |
| H  | -1.71945400 | 2.64628800  | 1.47165200  |
| H  | -3.71093800 | 1.80036400  | 0.26026200  |
| Br | 2.82199200  | -2.78565200 | -0.37754500 |
| Br | -4.55021400 | -0.83305100 | -0.70823400 |

Entry: 6F-7F

$E^{\text{CP}}$  (a.u.): -1004.42616

|   |             |             |             |
|---|-------------|-------------|-------------|
| C | 0.52513300  | 0.80209800  | 2.12642500  |
| C | 2.01416400  | 0.24125100  | 0.57863600  |
| H | -0.02519700 | 1.46900200  | 2.77045300  |
| C | 1.33414400  | -0.92802300 | 0.96511100  |
| C | 2.95884600  | 0.20228800  | -0.43193200 |
| C | 1.65288900  | -2.14383000 | 0.35652800  |
| C | 3.25904100  | -0.98782900 | -1.04426300 |
| H | 1.14430600  | -3.05292900 | 0.65390700  |
| C | 2.60860800  | -2.16227800 | -0.63559200 |
| H | 4.00577700  | -1.00134100 | -1.82656800 |
| H | 2.87170700  | -3.09574900 | -1.11576600 |
| C | -2.44305700 | -1.50131900 | -0.67163500 |
| C | -1.40114600 | -1.96792400 | -1.40886800 |
| C | -2.21625000 | -0.09745200 | -0.50251900 |
| H | -1.19585600 | -2.97369800 | -1.73926600 |
| N | -0.55169700 | -0.93345100 | -1.74555400 |
| C | -1.01567500 | 0.21599600  | -1.17210700 |
| C | -2.90247900 | 0.90713200  | 0.17506500  |
| H | 0.38150300  | -1.05716700 | -2.09875200 |
| C | -0.48141500 | 1.49736600  | -1.17120900 |
| C | -2.37981100 | 2.18312900  | 0.19650400  |
| H | 0.44683200  | 1.75331500  | -1.66634800 |
| C | -1.18367700 | 2.44294800  | -0.46702000 |
| C | -3.59622900 | -2.26561000 | -0.13636500 |
| H | -3.67343400 | -2.16034800 | 0.95008700  |
| H | -4.54305700 | -1.91381500 | -0.55431400 |
| H | -3.50882500 | -3.32861500 | -0.36150100 |
| N | 1.53088200  | 1.28182800  | 1.31725000  |
| H | 1.74269700  | 2.24977500  | 1.15775300  |
| C | 0.37618600  | -0.53924100 | 1.95335600  |
| C | -0.61131300 | -1.43323900 | 2.60572400  |
| H | -1.22806000 | -1.93548900 | 1.85313100  |
| H | -0.12864700 | -2.21176400 | 3.20192400  |
| H | -1.27761900 | -0.87287600 | 3.26223200  |
| H | -3.83109200 | 0.68735200  | 0.68846900  |
| H | -2.87101200 | 2.99360300  | 0.71744600  |
| F | -0.67861200 | 3.68276000  | -0.39219700 |
| F | 3.55060200  | 1.34161100  | -0.80666900 |

Entry: 6Br-7Br

$E^{\text{CP}}$  (a.u.): -5952.96154

|    |             |             |             |
|----|-------------|-------------|-------------|
| C  | 0.42713300  | 0.57296400  | 2.17386900  |
| C  | 1.73878400  | -0.47859500 | 0.72241700  |
| H  | 0.07475900  | 1.41062100  | 2.75461400  |
| C  | 0.73373000  | -1.37884800 | 1.13284400  |
| C  | 2.66599100  | -0.84184200 | -0.24009100 |
| C  | 0.70349600  | -2.66432300 | 0.59564500  |
| C  | 2.62202100  | -2.10936900 | -0.77659100 |
| H  | -0.05916900 | -3.36811900 | 0.90721900  |
| C  | 1.64622300  | -3.01778700 | -0.34725700 |
| H  | 3.35239100  | -2.39424600 | -1.52173800 |
| H  | 1.64174800  | -4.01376000 | -0.77077800 |
| C  | -2.95450700 | -1.12250200 | -0.83206200 |
| C  | -2.02442700 | -1.83174000 | -1.52677000 |
| C  | -2.38216800 | 0.16868300  | -0.60462300 |
| H  | -2.06791500 | -2.85057200 | -1.87758100 |
| N  | -0.91801700 | -1.05105600 | -1.78141300 |
| C  | -1.10358800 | 0.17069900  | -1.19796700 |
| C  | -2.82064600 | 1.30535000  | 0.07116600  |
| H  | -0.03133300 | -1.40197800 | -2.09949700 |
| C  | -0.25385000 | 1.26444100  | -1.12351700 |
| C  | -1.98241000 | 2.39464900  | 0.17102600  |
| H  | 0.73435600  | 1.26299700  | -1.56571900 |
| C  | -0.71709700 | 2.34923600  | -0.41754500 |
| C  | -4.29916700 | -1.56900800 | -0.39215400 |
| H  | -4.41960000 | -1.46653700 | 0.69026700  |
| H  | -5.09191100 | -0.97525800 | -0.85450800 |
| H  | -4.47548300 | -2.61364800 | -0.64846300 |
| N  | 1.55252600  | 0.69330000  | 1.39005000  |
| H  | 2.03922100  | 1.55061600  | 1.19405100  |
| C  | -0.09890200 | -0.67621200 | 2.05911600  |
| C  | -1.31459900 | -1.21423000 | 2.71593600  |
| H  | -2.02051300 | -1.58948800 | 1.96879700  |
| H  | -1.08380500 | -2.04541300 | 3.38713600  |
| H  | -1.82279800 | -0.44489900 | 3.29773500  |
| H  | -3.80335500 | 1.32940900  | 0.52731800  |
| H  | -2.28390600 | 3.28648500  | 0.70279900  |
| Cl | 0.35297800  | 3.72093700  | -0.20247800 |
| Cl | 3.84464900  | 0.33192700  | -0.76533100 |

Entry: 6I-7I

$E^{\text{CP}}$  (a.u.): -1396.27826

|   |             |             |             |
|---|-------------|-------------|-------------|
| C | -0.59954600 | -0.05989300 | 2.30566100  |
| C | 0.52377400  | -1.44630000 | 0.97583600  |
| H | -0.76461700 | 0.84608300  | 2.86716500  |
| C | -0.73672500 | -2.02229400 | 1.25215400  |
| C | 1.41640000  | -2.06157200 | 0.10970400  |
| C | -1.06784600 | -3.25082600 | 0.68676300  |
| C | 1.06746900  | -3.27230900 | -0.45520100 |
| H | -2.02863800 | -3.70598500 | 0.89704600  |
| C | -0.16498600 | -3.86568600 | -0.15548200 |
| H | 1.75540500  | -3.76876500 | -1.12710100 |
| H | -0.40280400 | -4.82360600 | -0.60000200 |
| C | -3.89652200 | -0.74421000 | -1.09077900 |
| C | -3.12023200 | -1.69245400 | -1.68252700 |
| C | -3.02602400 | 0.34892100  | -0.78756300 |
| H | -3.39774900 | -2.66964400 | -2.04485000 |
| N | -1.82347600 | -1.24537900 | -1.80163300 |
| C | -1.73623400 | -0.00618800 | -1.23045600 |
| C | -3.21472000 | 1.57777300  | -0.15915600 |
| H | -1.03475000 | -1.82982100 | -2.01963500 |
| C | -0.63640400 | 0.82028600  | -1.05086500 |
| C | -2.13021500 | 2.40504200  | 0.04096700  |
| H | 0.35249300  | 0.52648100  | -1.38440500 |
| C | -0.86047800 | 2.01358900  | -0.39906200 |
| C | -5.35167500 | -0.80367200 | -0.80774900 |
| H | -5.55716300 | -0.65493700 | 0.25643100  |
| H | -5.89923200 | -0.02544600 | -1.34558600 |
| H | -5.77458000 | -1.76599400 | -1.09605900 |
| N | 0.59476100  | -0.26632500 | 1.65405800  |
| H | 1.32632500  | 0.41770200  | 1.55097000  |

|    |             |             |             |
|----|-------------|-------------|-------------|
| C  | -0.12442500 | 0.12946600  | 2.25038500  |
| C  | 1.11447900  | -1.10120100 | 0.87552400  |
| H  | -0.38183400 | 1.00521400  | 2.82486100  |
| C  | -0.05453000 | -1.83017300 | 1.18334000  |
| C  | 2.04591400  | -1.59915500 | -0.02154500 |
| C  | -0.24977800 | -3.08563000 | 0.61208200  |
| C  | 1.83617100  | -2.83511600 | -0.59367900 |
| H  | -1.13928300 | -3.65849500 | 0.84636400  |
| C  | 0.69426600  | -3.57662100 | -0.26586700 |
| H  | 2.56443200  | -3.23053200 | -1.28895600 |
| H  | 0.56127400  | -4.55221300 | -0.71528400 |
| C  | -3.48147900 | -0.91898800 | -0.97946800 |
| C  | -2.63257700 | -1.76450200 | -1.62414200 |
| C  | -2.72720500 | 0.26291100  | -0.69721700 |
| H  | -2.81455800 | -2.76220100 | -1.99095800 |
| N  | -1.40230700 | -1.16967800 | -1.79716500 |
| C  | -1.42860200 | 0.06306700  | -1.20707900 |
| C  | -3.02269000 | 1.45136500  | -0.03312400 |
| H  | -0.56346600 | -1.65874300 | -2.05824100 |
| C  | -0.42164900 | 1.00547500  | -1.05942200 |
| C  | -2.02927000 | 2.39158800  | 0.13846100  |
| H  | 0.57905000  | 0.84268100  | -1.43985300 |
| C  | -0.75019400 | 2.14808500  | -0.36781300 |
| C  | -4.90431800 | -1.14839500 | -0.62748100 |
| H  | -5.07068100 | -1.04037700 | 0.44845300  |
| H  | -5.56276400 | -0.42927600 | -1.12141600 |
| H  | -5.22985300 | -2.14809600 | -0.91492100 |
| N  | 1.06502400  | 0.07519700  | 1.55999300  |
| H  | 1.69993200  | 0.84449000  | 1.43105500  |
| C  | -0.83559400 | -1.01427000 | 2.06011400  |
| C  | -2.17556300 | -1.35104000 | 2.59917100  |
| H  | -2.88023800 | -1.54674200 | 1.78431200  |
| H  | -2.15112900 | -2.24498600 | 3.22744700  |
| H  | -2.57736300 | -0.53242200 | 3.19677400  |
| H  | -4.01692600 | 1.62990500  | 0.35956000  |
| H  | -2.22452800 | 3.31540100  | 0.66560800  |
| Br | 0.62153500  | 3.42202200  | -0.02935100 |
| Br | 3.56278500  | -0.55154900 | -0.45773600 |

Entry: 7F-7F

$E^{\text{CP}}$  (a.u.): -1004.42507

|   |             |             |             |
|---|-------------|-------------|-------------|
| C | -0.07664000 | -1.89303600 | 1.28767900  |
| C | 0.08257300  | -0.88753100 | 2.19048400  |
| C | -1.15980300 | -1.50417300 | 0.43690400  |
| H | 0.81171800  | -0.79278300 | 2.97898100  |
| N | -0.84579700 | 0.10489800  | 1.97026600  |
| C | -1.60811800 | -0.25225000 | 0.89760900  |
| C | -1.75737400 | -2.07770300 | -0.68792100 |
| H | -0.89939900 | 0.98451300  | 2.44844000  |
| C | -2.63515600 | 0.41028900  | 0.25028800  |
| C | -2.77762400 | -1.39816200 | -1.31816800 |
| H | -1.42166300 | -3.03926200 | -1.05657000 |
| C | -3.22365000 | -0.15235100 | -0.85257900 |
| H | -3.25774900 | -1.83067000 | -2.18639700 |
| H | -4.02663900 | 0.37710500  | -1.34769000 |
| C | 0.72027100  | -3.13865800 | 1.17121900  |
| H | 0.10973400  | -4.02809900 | 1.34706200  |
| H | 1.15247200  | -3.23914200 | 0.17142300  |
| H | 1.54158200  | -3.14911400 | 1.88842900  |
| C | 0.49154400  | 2.42629600  | -0.31721000 |
| C | -0.33660000 | 1.95468900  | -1.28777300 |
| C | 1.52376900  | 1.44725100  | -0.15410200 |
| H | -1.24154100 | 2.39259400  | -1.67921400 |
| N | 0.12091300  | 0.74862400  | -1.76903000 |
| C | 1.24133400  | 0.41123300  | -1.06172100 |
| C | 2.63707100  | 1.34658300  | 0.68327100  |
| H | -0.43457500 | 0.09435200  | -2.29434800 |
| C | 2.04296100  | -0.71472000 | -1.11148200 |
| C | 3.42722700  | 0.22042600  | 0.60676400  |
| C | 3.13351200  | -0.81710800 | -0.28763400 |

|   |             |             |             |
|---|-------------|-------------|-------------|
| C | -1.43957300 | -1.10886700 | 2.09768300  |
| C | -2.82720000 | -1.27359900 | 2.59379700  |
| H | -3.52313300 | -1.39203300 | 1.75722000  |
| H | -2.93291800 | -2.15635200 | 3.22942900  |
| H | -3.14544200 | -0.40489200 | 3.17052700  |
| H | -4.19914600 | 1.87611900  | 0.18259700  |
| H | -2.25316400 | 3.35625300  | 0.54137000  |
| I | 3.23165200  | -1.11558100 | -0.35453400 |
| I | 0.78503800  | 3.25539800  | 0.02878900  |

Entry: 7Cl-7Cl  
 $E^{\text{CP}}$  (a.u.): -1725.14922

|    |             |             |             |
|----|-------------|-------------|-------------|
| C  | 0.50716100  | -1.42975100 | 1.77115300  |
| C  | 0.04197600  | -0.33445300 | 2.42905100  |
| C  | -0.44407500 | -1.71296300 | 0.74062600  |
| H  | 0.48682600  | 0.20373500  | 3.25068200  |
| N  | -1.15399400 | 0.07900900  | 1.88476800  |
| C  | -1.46319300 | -0.74330300 | 0.84472300  |
| C  | -0.50603600 | -2.66588600 | -0.27518500 |
| H  | -1.67513700 | 0.89642100  | 2.14341400  |
| C  | -2.52559800 | -0.73126500 | -0.04339700 |
| C  | -1.56781800 | -2.63556700 | -1.15484800 |
| H  | 0.27372400  | -3.41148700 | -0.37343300 |
| C  | -2.57964500 | -1.67387700 | -1.04372100 |
| H  | -1.63597800 | -3.37164600 | -1.94525400 |
| H  | -3.41243000 | -1.66733600 | -1.73413400 |
| C  | 1.76038400  | -2.17723400 | 2.03750300  |
| H  | 1.56128400  | -3.20681000 | 2.34579300  |
| H  | 2.38907500  | -2.22506000 | 1.14340600  |
| H  | 2.34251300  | -1.69744300 | 2.82485300  |
| C  | -0.41447400 | 2.37272700  | -0.63001400 |
| C  | -0.80082100 | 1.48810500  | -1.58827000 |
| C  | 0.88438700  | 1.95597700  | -0.19713700 |
| H  | -1.72951400 | 1.44310400  | -2.13533900 |
| N  | 0.18531300  | 0.55294200  | -1.80311000 |
| C  | 1.21294700  | 0.80669900  | -0.94391600 |
| C  | 1.77851800  | 2.42917000  | 0.76163200  |
| H  | 0.08388200  | -0.29221200 | -2.33746100 |
| C  | 2.40354000  | 0.13544300  | -0.72218000 |
| C  | 2.96378300  | 1.75406200  | 0.96244600  |
| C  | 3.28042800  | 0.60762800  | 0.22649200  |
| H  | 3.67141300  | 2.11068400  | 1.69939700  |
| H  | 4.20944900  | 0.08031700  | 0.39789200  |
| C  | -1.18250800 | 3.53032800  | -0.11050800 |
| H  | -1.27658100 | 3.48861600  | 0.97922400  |
| H  | -0.69966700 | 4.48207100  | -0.34674300 |
| H  | -2.18990300 | 3.55135100  | -0.52715800 |
| H  | 1.54403300  | 3.31618800  | 1.33851100  |
| Cl | 2.74615000  | -1.31309500 | -1.63302400 |
| Cl | -3.76120600 | 0.49078900  | 0.12232100  |

Entry: 7I-7I  
 $E^{\text{CP}}$  (a.u.): -1396.27979

|   |             |             |             |
|---|-------------|-------------|-------------|
| C | 0.57294900  | -0.67723500 | 2.32371200  |
| C | -0.22802900 | 0.37887400  | 2.62534000  |
| C | -0.09833500 | -1.40613200 | 1.29128400  |
| H | -0.06768900 | 1.16931800  | 3.34084000  |
| N | -1.37040300 | 0.34754600  | 1.85690500  |
| C | -1.31228300 | -0.73240400 | 1.02717800  |
| C | 0.22655500  | -2.54552600 | 0.55877300  |
| H | -2.09487500 | 1.04267000  | 1.84375100  |
| C | -2.19507600 | -1.20082700 | 0.06474900  |
| C | -0.64932200 | -2.99114900 | -0.40837300 |
| H | 1.15675200  | -3.06817100 | 0.74786300  |
| C | -1.85772500 | -2.32848600 | -0.65430300 |
| H | -0.41485000 | -3.87675900 | -0.98474300 |
| H | -2.53699400 | -2.71065800 | -1.40525500 |
| C | 1.87477100  | -1.02506100 | 2.94385500  |
| H | 1.82337700  | -1.97538000 | 3.48185800  |
| H | 2.66311800  | -1.12766800 | 2.19272600  |

|   |             |             |             |
|---|-------------|-------------|-------------|
| H | 4.29547000  | 0.12627000  | 1.24567400  |
| H | 3.74838800  | -1.70574500 | -0.33947800 |
| C | 0.35785800  | 3.68976600  | 0.44786100  |
| H | 0.35228000  | 3.50156600  | 1.52611600  |
| H | 1.18742100  | 4.37522400  | 0.25582600  |
| H | -0.56846200 | 4.20784800  | 0.19816600  |
| F | 1.72334200  | -1.70133400 | -1.95707500 |
| H | 2.87493900  | 2.14218400  | 1.37930500  |
| F | -3.01764600 | 1.61060600  | 0.70092900  |

Entry: 7Br-7Br  
 $E^{\text{CP}}$  (a.u.): -5952.96273

|    |             |             |             |
|----|-------------|-------------|-------------|
| C  | 0.53228100  | -0.92894100 | 2.13416700  |
| C  | -0.18861000 | 0.14386400  | 2.55621600  |
| C  | -0.22264300 | -1.52815700 | 1.07611200  |
| H  | 0.05020400  | 0.86327900  | 3.32295500  |
| N  | -1.35914900 | 0.24669500  | 1.83712700  |
| C  | -1.39690000 | -0.76043200 | 0.92089900  |
| C  | -0.00338000 | -2.62024100 | 0.23829400  |
| H  | -2.03391100 | 0.98699700  | 1.90141200  |
| C  | -2.33753400 | -1.08782100 | -0.04197200 |
| C  | -0.94540600 | -2.92819100 | -0.72103100 |
| H  | 0.89515500  | -3.21623300 | 0.34104500  |
| C  | -2.11338800 | -2.16940300 | -0.86278500 |
| H  | -0.79436000 | -3.77717600 | -1.37485000 |
| H  | -2.84794700 | -2.43053200 | -1.61278700 |
| C  | 1.84330500  | -1.39537600 | 2.64746000  |
| H  | 1.77453700  | -2.39532100 | 3.08344700  |
| H  | 2.58737300  | -1.44375700 | 1.84719000  |
| H  | 2.22662900  | -0.72121600 | 3.41393800  |
| C  | -0.62690500 | 2.21250400  | -0.90208000 |
| C  | -0.70526100 | 1.14755500  | -1.74465900 |
| C  | 0.65309400  | 2.13116500  | -0.26870700 |
| H  | -1.52030900 | 0.84535500  | -2.38320500 |
| N  | 0.45650300  | 0.41227700  | -1.69461900 |
| C  | 1.29279100  | 0.98371800  | -0.78304800 |
| C  | 1.29905700  | 2.90103800  | 0.69655500  |
| H  | 0.60379100  | -0.48641400 | -2.11918700 |
| C  | 2.54989200  | 0.61193100  | -0.33536400 |
| C  | 2.54882000  | 2.51620900  | 1.13321400  |
| C  | 3.17703200  | 1.37511300  | 0.62286300  |
| H  | 3.06580600  | 3.10289600  | 1.88126800  |
| H  | 4.15763300  | 1.08608100  | 0.97728000  |
| C  | -1.66383900 | 3.24342600  | -0.65346600 |
| H  | -1.94132000 | 3.28224000  | 0.40532300  |
| H  | -1.31869600 | 4.24459700  | -0.92397100 |
| H  | -2.57063400 | 3.03299200  | -1.22101800 |
| H  | 0.82404500  | 3.78897700  | 1.09745400  |
| Br | 3.36264900  | -0.94829500 | -1.04063700 |
| Br | -3.90533200 | -0.03637200 | -0.21393000 |

Entry: 4I-7Cl  
 $E^{\text{CP}}$  (a.u.): -1560.71086

|   |             |             |             |
|---|-------------|-------------|-------------|
| C | 0.44849200  | 0.48238300  | -1.94247400 |
| C | 2.37051100  | -0.00037300 | -0.93694400 |
| H | -0.46617500 | 0.27068400  | -2.47388600 |
| C | 2.14453300  | 1.38545000  | -0.80491900 |
| C | 3.49108700  | -0.59062700 | -0.37497300 |
| C | 3.05820700  | 2.16727600  | -0.10024200 |
| C | 4.38081800  | 0.18551300  | 0.33325900  |
| H | 2.89780200  | 3.23399800  | 0.00374500  |
| C | 4.15971300  | 1.56192300  | 0.46667000  |
| H | 5.25707600  | -0.27701200 | 0.76701000  |
| H | 4.88068700  | 2.15321300  | 1.01593500  |
| C | -0.83083200 | 1.30468100  | 1.51371000  |
| C | 0.36058900  | 1.51383600  | 2.13661800  |
| C | -0.83866000 | -0.07807500 | 1.12430600  |
| H | 0.74660400  | 2.43025500  | 2.55457900  |
| N | 1.09044000  | 0.35471000  | 2.19113000  |
| C | 0.38644400  | -0.63625900 | 1.56873000  |

|   |             |             |             |
|---|-------------|-------------|-------------|
| H | 2.18975300  | -0.25749500 | 3.65138500  |
| C | -0.70366100 | 2.25900300  | -0.96545600 |
| C | -0.69145000 | 1.12916400  | -1.72334900 |
| C | 0.55316300  | 2.29815700  | -0.28380800 |
| H | -1.45907600 | 0.73530800  | -2.37095500 |
| N | 0.50497100  | 0.46688400  | -1.57321200 |
| C | 1.27813200  | 1.15508700  | -0.68415700 |
| C | 1.11620200  | 3.18108700  | 0.63432800  |
| H | 0.71226300  | -0.45388500 | -1.92035200 |
| C | 2.54625400  | 0.90214300  | -0.18137600 |
| C | 2.37252200  | 2.91400500  | 1.13542800  |
| C | 3.08828300  | 1.78222800  | 0.73119400  |
| H | 2.82677100  | 3.58967300  | 1.84844700  |
| H | 4.07542600  | 1.59700400  | 1.13474100  |
| C | -1.78925400 | 3.26174400  | -0.84035000 |
| H | -2.12589500 | 3.35788800  | 0.19725900  |
| H | -1.46029200 | 4.25510000  | -1.15656300 |
| H | -2.65555500 | 2.98733100  | -1.44271800 |
| H | 0.57204700  | 4.06514500  | 0.94618800  |
| I | 3.60199400  | -0.79897800 | -0.81572400 |
| I | -4.01271900 | -0.20401200 | -0.27216900 |

Entry: 5Cl-6F  
 $E^{\text{CP}}$  (a.u.): -1364.78606

|    |             |             |             |
|----|-------------|-------------|-------------|
| C  | 0.12587100  | 1.15819000  | -1.90447600 |
| C  | 1.34847700  | -0.53541200 | -1.11845200 |
| H  | -0.73353000 | 1.62126800  | -2.36317900 |
| C  | 2.04858100  | 0.66614000  | -0.88481300 |
| C  | 1.84245800  | -1.76955200 | -0.71350700 |
| C  | 3.27545500  | 0.62324000  | -0.22732300 |
| C  | 3.05282500  | -1.75507300 | -0.06368800 |
| H  | 1.32112400  | -2.70120300 | -0.88859900 |
| H  | 3.82907800  | 1.53607600  | -0.04102600 |
| C  | 3.77727500  | -0.59183800 | 0.18934700  |
| H  | 4.72756300  | -0.67388500 | 0.69897300  |
| C  | -0.66571900 | 1.67875000  | 1.56758000  |
| C  | 0.41613400  | 1.13488000  | 2.18766700  |
| C  | -1.42149300 | 0.58070400  | 1.05487600  |
| H  | 1.23725500  | 1.63077100  | 2.68085100  |
| N  | 0.37097200  | -0.23834500 | 2.11290400  |
| C  | -0.74054400 | -0.60293300 | 1.40357100  |
| C  | -2.59464200 | 0.50515100  | 0.30595100  |
| H  | 1.11994200  | -0.85524100 | 2.36925900  |
| C  | -1.20218500 | -1.85384900 | 1.02095600  |
| C  | -3.03281600 | -0.74045000 | -0.07754200 |
| H  | -0.67213600 | -2.75785300 | 1.29390700  |
| C  | -2.35682500 | -1.91467000 | 0.26815800  |
| H  | -2.75813500 | -2.86639100 | -0.05186600 |
| C  | -0.99556300 | 3.11408100  | 1.39807900  |
| H  | -1.01806800 | 3.38682500  | 0.33779000  |
| H  | -1.97739400 | 3.35744000  | 1.81169500  |
| H  | -0.26067500 | 3.75269500  | 1.88898600  |
| N  | 0.18797900  | -0.21311000 | -1.76073500 |
| H  | -0.57924200 | -0.84241700 | -1.91737800 |
| C  | 1.24591300  | 1.73455400  | -1.39693900 |
| C  | 1.58099000  | 3.17726700  | -1.33231900 |
| H  | 1.68998500  | 3.50861000  | -0.29438700 |
| H  | 2.52454400  | 3.39861500  | -1.83759100 |
| H  | 0.80501200  | 3.78800700  | -1.79499100 |
| H  | -3.14298400 | 1.39469200  | 0.02181900  |
| Cl | -4.49212100 | -0.87714500 | -1.03584100 |
| F  | 3.56843600  | -2.91793800 | 0.35189900  |

Entry: 6F-6Br  
 $E^{\text{CP}}$  (a.u.): -3478.69367

|   |             |             |             |
|---|-------------|-------------|-------------|
| C | -1.58718000 | 2.36770900  | -1.39506600 |
| C | 0.14732600  | 0.98950800  | -1.15587400 |
| H | -2.57737200 | 2.66034300  | -1.70633600 |
| C | 0.46970000  | 2.21740300  | -0.54376700 |
| C | 1.01099800  | -0.09582600 | -1.13724800 |

|    |             |             |             |
|----|-------------|-------------|-------------|
| C  | -1.70133000 | -0.92900000 | 0.42599900  |
| H  | 2.05611700  | 0.28858700  | 2.45941100  |
| C  | 0.74024600  | -1.96079800 | 1.36277800  |
| C  | -1.36095300 | -2.24832800 | 0.20951900  |
| H  | 1.69077500  | -2.34386700 | 1.71303500  |
| C  | -0.14804800 | -2.76050100 | 0.68077200  |
| H  | -2.03985800 | -2.89610100 | -0.32911900 |
| H  | 0.09083600  | -3.80071500 | 0.50040400  |
| C  | -1.86673900 | 2.35189200  | 1.31238200  |
| H  | -2.07533300 | 2.52523800  | 0.25423500  |
| H  | -2.81659400 | 2.09146300  | 1.78292900  |
| H  | -1.52915100 | 3.29612200  | 1.74397700  |
| N  | 1.33764800  | -0.52787900 | -1.65136900 |
| H  | 1.15951300  | -1.51127700 | -1.75406700 |
| C  | 0.90767100  | 1.66971200  | -1.46328600 |
| C  | 0.26303600  | 3.00101200  | -1.56745500 |
| H  | 0.10761800  | 3.44033100  | -0.57711700 |
| H  | 0.87336100  | 3.70532700  | -2.13862000 |
| H  | -0.71018600 | 2.93082600  | -2.05537500 |
| Cl | 3.75087700  | -2.30448200 | -0.57632000 |
| I  | -3.52213800 | -0.25786800 | -0.39839000 |

Entry: 5Cl-7Br  
 $E^{\text{CP}}$  (a.u.): -3839.05363

|    |             |             |             |
|----|-------------|-------------|-------------|
| C  | 0.25189600  | 0.88775300  | 2.15521900  |
| C  | -1.43079700 | 0.44304300  | 0.77068600  |
| H  | 1.03833200  | 0.65540300  | 2.85546800  |
| C  | -1.18803400 | 1.83286100  | 0.73583500  |
| C  | -2.42244600 | -0.12265500 | -0.01585500 |
| C  | -1.95047700 | 2.64381000  | -0.10230500 |
| C  | -3.16009500 | 0.68513400  | -0.85282800 |
| H  | -1.77602700 | 3.71312800  | -0.13319000 |
| C  | -2.92116400 | 2.06472300  | -0.89223400 |
| H  | -3.93612700 | 0.24781300  | -1.46651500 |
| H  | -3.52546800 | 2.67857000  | -1.54740700 |
| C  | 2.37956300  | 1.79867400  | -0.88370600 |
| C  | 1.33113900  | 2.24701300  | -1.62614600 |
| C  | 2.19526400  | 0.38821800  | -0.74898200 |
| H  | 1.09763100  | 3.25493600  | -1.93253700 |
| N  | 0.51553200  | 1.19935900  | -1.98627900 |
| C  | 1.01358100  | 0.04848000  | -1.43719100 |
| C  | 2.91427200  | -0.60350600 | -0.08344300 |
| H  | -0.40420800 | 1.29690500  | -2.37866500 |
| C  | 0.53475700  | -1.25250000 | -1.47350300 |
| C  | 2.42191000  | -1.88679400 | -0.12173100 |
| H  | -0.38016100 | -1.50453400 | -1.99559600 |
| C  | 1.24940000  | -2.22276200 | -0.80327300 |
| H  | 0.91110600  | -3.24996000 | -0.79870400 |
| C  | 3.48703000  | 2.58919400  | -0.29467800 |
| H  | 3.51494500  | 2.47634300  | 0.79378600  |
| H  | 4.46125600  | 2.26698100  | -0.67102200 |
| H  | 3.38072900  | 3.65184400  | -0.51556900 |
| N  | -0.55380700 | -0.11011800 | 1.65400500  |
| H  | -0.42314400 | -1.09704500 | 1.78913600  |
| C  | -0.10716700 | 2.09182700  | 1.63437900  |
| C  | 0.50089200  | 3.41819100  | 1.89802800  |
| H  | 0.94056300  | 3.83414300  | 0.98556800  |
| H  | -0.23878700 | 4.13814200  | 2.25689300  |
| H  | 1.29086800  | 3.35212100  | 2.64644100  |
| H  | 3.82754000  | -0.37843500 | 0.45287400  |
| Cl | 3.28756900  | -3.15965300 | 0.71406600  |
| Br | -2.74277000 | -1.98717600 | 0.07703500  |

Entry: 4F-6I  
 $E^{\text{CP}}$  (a.u.): -1200.35224

|   |             |            |             |
|---|-------------|------------|-------------|
| C | -2.50467100 | 1.70005900 | -1.45488800 |
| C | -0.41078500 | 1.00566600 | -1.14159800 |
| H | -3.51395800 | 1.64803200 | -1.83127900 |
| C | -0.59516100 | 2.19924200 | -0.41524200 |
| C | 0.77931700  | 0.29455100 | -1.10676600 |

|    |             |             |             |
|----|-------------|-------------|-------------|
| C  | 1.69951600  | 2.35749900  | 0.09529600  |
| C  | 2.20073900  | 0.07985600  | -0.47027200 |
| H  | 0.75357000  | -1.04117500 | -1.59718200 |
| H  | 1.97051700  | 3.29473800  | 0.56723300  |
| C  | 2.56295700  | 1.28394900  | 0.13808600  |
| H  | 3.51748700  | 1.35901600  | 0.64066500  |
| C  | -0.80560600 | 0.12317500  | 2.07319900  |
| C  | 0.25022700  | -0.72858500 | 2.12885200  |
| C  | -1.75587000 | -0.47524300 | 1.18558100  |
| H  | 1.17971400  | -0.63080700 | 2.66696300  |
| N  | 0.01134400  | -1.83692700 | 1.34117600  |
| C  | -1.20184600 | -1.69171200 | 0.73259900  |
| C  | -3.00784100 | -0.08267900 | 0.72054300  |
| H  | 0.69673500  | -2.53651000 | 1.12011300  |
| C  | -1.85512600 | -2.50495000 | -0.18621700 |
| C  | -3.67379800 | -0.87979600 | -0.18787500 |
| H  | -1.44851300 | -3.44012200 | -0.54706700 |
| C  | -3.08367000 | -2.06593200 | -0.62008400 |
| C  | -0.95382400 | 1.43250300  | 2.75297200  |
| H  | -1.10961700 | 2.23165600  | 2.02116700  |
| H  | -1.81044800 | 1.44531700  | 3.43189300  |
| H  | -0.06370000 | 1.68030500  | 3.33183700  |
| C  | -0.65410000 | 3.08552100  | -0.71298100 |
| C  | -0.75326800 | 4.48505200  | -0.23094600 |
| H  | -0.59731200 | 4.54595700  | 0.85013900  |
| H  | 0.00173600  | 5.12517100  | -0.69450500 |
| H  | -1.73113800 | 4.91367200  | -0.44994800 |
| N  | -1.10232200 | 1.11390000  | -1.69478400 |
| H  | -1.66247700 | 0.34752400  | -2.02426100 |
| H  | -3.45080300 | 0.84531100  | 1.06261800  |
| H  | -4.65180300 | -0.61891200 | -0.56894300 |
| Br | 3.38149300  | -1.40462200 | -0.32120900 |
| F  | -3.75422200 | -2.81591600 | -1.50084500 |

|   |             |             |             |
|---|-------------|-------------|-------------|
| C | 0.45347300  | 2.69439500  | 0.35629800  |
| C | 1.78117400  | 0.80296600  | -0.30910700 |
| H | 0.90053900  | -0.63018700 | -1.65708300 |
| H | 0.33626400  | 3.61344100  | 0.91883200  |
| C | 1.63854800  | 1.99171500  | 0.41452300  |
| H | 2.45849000  | 2.35122600  | 1.02167700  |
| C | -1.43010900 | -0.46830100 | 1.83169400  |
| C | -0.13961500 | -0.86335700 | 1.99966100  |
| C | -1.95054000 | -1.28581400 | 0.77890900  |
| H | 0.60480500  | -0.47643100 | 2.67755300  |
| N | 0.16977300  | -1.88373100 | 1.12987300  |
| C | -0.91742100 | -2.14275400 | 0.34417800  |
| C | -3.17039000 | -1.37666000 | 0.11916600  |
| H | 1.09598100  | -2.24258500 | 0.97748500  |
| C | -1.07052600 | -3.02461400 | -0.72109400 |
| C | -3.35341800 | -2.23677000 | -0.93485300 |
| H | -0.25815000 | -3.66461500 | -1.04056800 |
| C | -2.29549200 | -3.05492100 | -1.35239600 |
| H | -4.31993000 | -2.27847500 | -1.41848000 |
| H | -2.45292100 | -3.73193900 | -2.18160100 |
| C | -2.12767100 | 0.62399600  | 2.55623300  |
| H | -2.45452600 | 1.40421200  | 1.86209100  |
| H | -3.01708000 | 0.26762400  | 3.07920400  |
| H | -1.46365000 | 1.08375400  | 3.28911900  |
| N | -1.58141100 | 0.73583600  | -1.79427900 |
| H | -1.80361800 | -0.14176100 | -2.23180600 |
| C | -1.94154800 | 2.62758800  | -0.63413100 |
| C | -2.57423800 | 3.84092800  | -0.06100300 |
| H | -2.51842100 | 3.84060100  | 1.03157400  |
| H | -2.07880700 | 4.75373400  | -0.40162800 |
| H | -3.62584600 | 3.90991900  | -0.33858800 |
| F | -4.18065900 | -0.59575300 | 0.50926300  |
| I | 3.55835200  | -0.30711300 | -0.10012300 |

#### Coordinates of toluene monomers

Electronic energies are provided at M06/cc-PVTZ(-PP) level of theory.

All structures are characterized by 0 imaginary frequencies.

#### Entry: H

$E_{\text{elec}}$  (a.u.): -271.42952

$E_{\text{elec}}$  N-1 system (a.u.): -271.10900

$E_{\text{elec}}$  N+1 system (a.u.): -271.36727

|   |             |             |             |
|---|-------------|-------------|-------------|
| C | 1.88855600  | 0.00559800  | -0.00949400 |
| C | 1.19206700  | 1.19661400  | 0.09499300  |
| C | -0.19252000 | 1.19362700  | 0.10632300  |
| C | -0.90541000 | 0.00588800  | 0.01236600  |
| C | -0.19328300 | -1.18364100 | -0.08826900 |
| C | 1.18970100  | -1.18680800 | -0.10030200 |
| H | 2.97078400  | 0.00514600  | -0.01592200 |
| H | -0.73633800 | -2.12023800 | -0.15518700 |
| H | 1.72543200  | -2.12450500 | -0.17724400 |
| C | -2.40059400 | 0.00131200  | -0.00249300 |
| H | -2.80798500 | 0.92161900  | 0.41608500  |
| H | -2.78373800 | -0.09143200 | -1.02161700 |
| H | -2.80213600 | -0.83790800 | 0.56711000  |
| H | 1.72869200  | 2.13383700  | 0.17128200  |
| H | -0.73342900 | 2.12964700  | 0.19203500  |

#### Entry: mF

$E_{\text{elec}}$  (a.u.): -370.67495

$E_{\text{elec}}$  N-1 system (a.u.): -370.34979

$E_{\text{elec}}$  N+1 system (a.u.): -370.62373

|   |             |             |             |
|---|-------------|-------------|-------------|
| C | 1.89518100  | -0.00117300 | -0.00949400 |
| C | 1.17296400  | 1.17152600  | 0.07110400  |
| C | -0.20368400 | 1.18873500  | 0.08291600  |
| C | -0.90526100 | -0.00886400 | 0.01077000  |
| C | -0.19037300 | -1.19638800 | -0.06889200 |
| C | 1.19471800  | -1.19124600 | -0.07940900 |
| H | 2.97572900  | 0.03403600  | -0.01344500 |
| H | -0.72760300 | -2.13575400 | -0.12151200 |
| H | 1.73623100  | -2.12627000 | -0.14053600 |

#### Entry: oF

$E_{\text{elec}}$  (a.u.): -370.67597

$E_{\text{elec}}$  N-1 system (a.u.): -370.35247

$E_{\text{elec}}$  N+1 system (a.u.): -370.61965

|   |             |             |             |
|---|-------------|-------------|-------------|
| C | 1.88771400  | 0.00368400  | -0.00109800 |
| C | 1.18836900  | 1.19763800  | 0.04885000  |
| C | -0.18787500 | 1.16008200  | 0.04894600  |
| C | -0.91459600 | -0.01889200 | 0.00132700  |
| C | -0.18516600 | -1.19846100 | -0.04805700 |
| C | 1.19986400  | -1.19556800 | -0.04960000 |
| H | 2.96952500  | 0.01464100  | -0.00195400 |
| H | -0.72400500 | -2.13833700 | -0.08598200 |
| H | 1.74096700  | -2.13152200 | -0.08860900 |
| C | -2.40627500 | 0.00869500  | 0.00407600  |
| H | -2.79305600 | 0.49581100  | 0.90096700  |
| H | -2.79470700 | 0.57120500  | -0.84680500 |
| H | -2.81304600 | -1.00055100 | -0.03901700 |
| H | 1.68969900  | 2.15526800  | 0.08746800  |
| F | -0.86071500 | 2.31452400  | 0.09702800  |

#### Entry: pF

$E_{\text{elec}}$  (a.u.): -370.67415

$E_{\text{elec}}$  N-1 system (a.u.): -370.35515

$E_{\text{elec}}$  N+1 system (a.u.): -370.62265

|   |             |             |             |
|---|-------------|-------------|-------------|
| C | 1.86287300  | 0.00022400  | -0.00597800 |
| C | 1.19477300  | 1.20063800  | 0.09363300  |
| C | -0.18942900 | 1.19130300  | 0.10323700  |
| C | -0.90594200 | 0.00532600  | 0.01383400  |
| C | -0.19422400 | -1.18487300 | -0.08119600 |
| C | 1.18839800  | -1.19917500 | -0.09279500 |
| H | -0.73593400 | -2.12190900 | -0.14472500 |
| H | 1.74875900  | -2.12155100 | -0.16365600 |
| C | -2.40150000 | 0.00386700  | -0.00255800 |

|   |             |             |             |
|---|-------------|-------------|-------------|
| C | -2.39993700 | 0.00036100  | 0.00548900  |
| H | -2.79558000 | 0.63094500  | 0.80319000  |
| H | -2.78618500 | 0.39751300  | -0.93579700 |
| H | -2.80593400 | -1.00248300 | 0.13289300  |
| F | 1.83006900  | 2.32933200  | 0.14221700  |
| H | -0.72127900 | 2.13816300  | 0.15005300  |

Entry: oCl

$E_{\text{elec}}$  (a.u.): -731.03556

$E_{\text{elec}}$  N-1 system (a.u.): -730.71464

$E_{\text{elec}}$  N+1 system (a.u.): -730.98435

|    |             |             |             |
|----|-------------|-------------|-------------|
| C  | 1.88588700  | 0.00231600  | -0.00244200 |
| C  | 1.19238200  | 1.19752700  | 0.04478600  |
| C  | -0.18945200 | 1.18046200  | 0.04574100  |
| C  | -0.92050400 | -0.00132900 | 0.00122800  |
| C  | -0.19302800 | -1.18503400 | -0.04561400 |
| C  | 1.18984000  | -1.19245600 | -0.04796200 |
| H  | -0.73725900 | -2.12174500 | -0.08097400 |
| H  | 1.72379100  | -2.13277000 | -0.08519000 |
| C  | -2.41114500 | -0.01105400 | 0.00287700  |
| H  | -2.80996800 | 0.47638700  | 0.89458100  |
| H  | -2.81203000 | 0.53476700  | -0.85342400 |
| H  | -2.79175500 | -1.03080600 | -0.03097700 |
| H  | 2.96768400  | 0.00892300  | -0.00357800 |
| H  | 1.71124000  | 2.14566600  | 0.08071700  |
| Cl | -1.03314000 | 2.71085700  | 0.10445600  |

Entry: pCl

$E_{\text{elec}}$  (a.u.): -731.03386

$E_{\text{elec}}$  N-1 system (a.u.): -730.71829

$E_{\text{elec}}$  N+1 system (a.u.): -730.98806

|    |             |             |             |
|----|-------------|-------------|-------------|
| C  | 1.87187300  | -0.00089400 | -0.00226500 |
| C  | 1.19662000  | 1.19864300  | 0.10442400  |
| C  | -0.18727500 | 1.19248000  | 0.11149000  |
| C  | -0.90544800 | 0.00864500  | 0.01270700  |
| C  | -0.19539900 | -1.18188900 | -0.08946100 |
| C  | 1.18659900  | -1.19748000 | -0.09866600 |
| H  | -0.73720700 | -2.11839200 | -0.16075300 |
| H  | 1.73459800  | -2.12658600 | -0.17621500 |
| C  | -2.40013900 | 0.00829200  | -0.00495800 |
| H  | -2.80523900 | 0.93550200  | 0.39971200  |
| H  | -2.78190200 | -0.09852100 | -1.02306200 |
| H  | -2.80487400 | -0.82095600 | 0.57662000  |
| H  | -0.72093900 | 2.13204100  | 0.19823800  |
| H  | 1.75117700  | 2.12368600  | 0.18377000  |
| Cl | 3.61629600  | -0.00812100 | -0.00920500 |

Entry: mBr

$E_{\text{elec}}$  (a.u.): -2844.94036

$E_{\text{elec}}$  N-1 system (a.u.): -2844.62427

$E_{\text{elec}}$  N+1 system (a.u.): -2844.89710

|    |             |             |             |
|----|-------------|-------------|-------------|
| C  | 1.89501800  | 0.00022000  | -0.02927500 |
| C  | 1.18874100  | 1.18394800  | 0.05717100  |
| C  | -0.19356100 | 1.20155600  | 0.07894500  |
| C  | -0.90408500 | 0.01090300  | 0.01159000  |
| C  | -0.19632500 | -1.18246600 | -0.07210100 |
| C  | 1.18579500  | -1.18758000 | -0.09329300 |
| H  | -0.74138500 | -2.11831900 | -0.11827600 |
| H  | 1.72260200  | -2.12531900 | -0.15680500 |
| C  | -2.39895300 | 0.01324500  | 0.00779600  |
| H  | -2.79986600 | 0.94779300  | 0.39901100  |
| H  | -2.78721800 | -0.11166800 | -1.00560200 |
| H  | -2.79764300 | -0.80619100 | 0.60693600  |
| H  | 2.97609300  | 0.00863000  | -0.04198800 |
| Br | 2.13412400  | 2.82524300  | 0.15406400  |
| H  | -0.72005200 | 2.14546800  | 0.15083500  |

Entry: ol

|   |             |             |             |
|---|-------------|-------------|-------------|
| H | -2.80648800 | 0.92123100  | 0.42457700  |
| H | -2.78676700 | -0.07867600 | -1.02168600 |
| H | -2.80552700 | -0.83788800 | 0.56131100  |
| H | -0.72592700 | 2.12969800  | 0.18461600  |
| H | 1.75902200  | 2.12053600  | 0.16548900  |
| F | 3.19665900  | -0.00323700 | -0.01328900 |

Entry: mCl

$E_{\text{elec}}$  (a.u.): -731.03418

$E_{\text{elec}}$  N-1 system (a.u.): -730.71309

$E_{\text{elec}}$  N+1 system (a.u.): -730.98729

|    |             |             |             |
|----|-------------|-------------|-------------|
| C  | 1.89440000  | -0.00007400 | -0.02665500 |
| C  | 1.18296500  | 1.18260200  | 0.03655000  |
| C  | -0.19785100 | 1.19761300  | 0.05772600  |
| C  | -0.90474100 | 0.00299200  | 0.01248700  |
| C  | -0.19403100 | -1.18899900 | -0.04758100 |
| C  | 1.18932700  | -1.18974400 | -0.06779700 |
| H  | -0.73548600 | -2.12735500 | -0.07577800 |
| H  | 1.72876700  | -2.12697000 | -0.11244400 |
| C  | -2.39956200 | 0.01004000  | 0.00340000  |
| H  | -2.79882100 | 0.85030000  | 0.57159900  |
| H  | -2.78336000 | 0.09745900  | -1.01573400 |
| H  | -2.80421200 | -0.91027000 | 0.42442700  |
| H  | -0.72253800 | 2.14365400  | 0.11195000  |
| Cl | 2.04921500  | 2.69599400  | 0.09545000  |
| H  | 2.97518900  | 0.01776100  | -0.03846200 |

Entry: oBr

$E_{\text{elec}}$  (a.u.): -2844.94150

$E_{\text{elec}}$  N-1 system (a.u.): -2844.62482

$E_{\text{elec}}$  N+1 system (a.u.): -2844.89680

|    |             |             |             |
|----|-------------|-------------|-------------|
| C  | 1.88522300  | 0.00275300  | -0.00292300 |
| C  | 1.19244200  | 1.19873500  | 0.04144700  |
| C  | -0.19034300 | 1.18649200  | 0.04290400  |
| C  | -0.92211500 | 0.00401800  | 0.00083700  |
| C  | -0.19512200 | -1.18097100 | -0.04314800 |
| C  | 1.18742500  | -1.19076200 | -0.04528400 |
| H  | -0.74021000 | -2.11730300 | -0.07629400 |
| H  | 1.71963200  | -2.13222400 | -0.08001300 |
| C  | -2.41325700 | -0.01788000 | 0.00196000  |
| H  | -2.81694400 | 0.45907400  | 0.89728400  |
| H  | -2.81919100 | 0.52946200  | -0.85104800 |
| H  | -2.78501100 | -1.04074500 | -0.03854600 |
| H  | 2.96711300  | 0.00854000  | -0.00418800 |
| H  | 1.71858400  | 2.14315900  | 0.07490000  |
| Br | -1.09094500 | 2.85911000  | 0.10513700  |

Entry: pBr

$E_{\text{elec}}$  (a.u.): -2844.94014

$E_{\text{elec}}$  N-1 system (a.u.): -2844.62902

$E_{\text{elec}}$  N+1 system (a.u.): -2844.89578

|    |             |             |             |
|----|-------------|-------------|-------------|
| C  | 1.87391600  | 0.00009300  | -0.00093800 |
| C  | 1.19358800  | 1.20062700  | 0.07713400  |
| C  | -0.18960300 | 1.19146900  | 0.08474000  |
| C  | -0.90520000 | 0.00300600  | 0.01357400  |
| C  | -0.19301400 | -1.18711300 | -0.05985200 |
| C  | 1.19035900  | -1.19905500 | -0.06832700 |
| H  | -0.73193200 | -2.12661800 | -0.10832100 |
| H  | 1.73533000  | -2.13176800 | -0.12276500 |
| C  | -2.39967800 | 0.00730400  | -0.00800400 |
| H  | -2.80449400 | 0.84888600  | 0.55450500  |
| H  | -2.77754800 | 0.09038700  | -1.02988900 |
| H  | -2.80786900 | -0.91145800 | 0.41341700  |
| H  | -0.72602200 | 2.13141100  | 0.15026600  |
| H  | 1.74114400  | 2.13164000  | 0.13470800  |
| Br | 3.76976400  | -0.00201800 | -0.00730400 |

Entry: ml

$E_{\text{elec}}$  (a.u.): -566.59878

$E_{\text{elec}}$  N-1 system (a.u.): -566.29324

$E_{\text{elec}}$  N+1 system (a.u.): -566.55072

|   |             |             |             |
|---|-------------|-------------|-------------|
| C | 1.88790400  | 0.00243300  | 0.00738100  |
| C | 1.18731300  | 1.19720500  | 0.00175600  |
| C | -0.19559900 | 1.19125000  | -0.00746500 |
| C | -0.90608400 | -0.00337700 | -0.00946500 |
| C | -0.19141700 | -1.19378300 | -0.00747100 |
| C | 1.19286400  | -1.19409600 | 0.00178900  |
| H | -0.73142600 | -2.13426300 | -0.01623500 |
| H | 1.73066000  | -2.13381300 | 0.00100500  |
| C | -2.40094000 | -0.00138300 | 0.00754100  |
| H | -2.78323100 | 0.15479300  | 1.01923600  |
| H | -2.80596700 | 0.79833400  | -0.61398500 |
| H | -2.80610700 | -0.94790900 | -0.35057900 |
| H | 2.95789346  | 0.00487532  | 0.01145482  |
| H | 1.71535428  | 2.12783463  | 0.00081228  |
| I | -1.24926939 | 3.00770156  | -0.02427126 |

Entry: *pl*

$E_{\text{elec}}$  (a.u.): -566.59784

$E_{\text{elec}}$  N-1 system (a.u.): -566.29767

$E_{\text{elec}}$  N+1 system (a.u.): -566.55496

|   |             |             |             |
|---|-------------|-------------|-------------|
| C | 1.87925800  | -0.00286600 | 0.01461700  |
| C | 1.19276900  | 1.18049100  | 0.22642900  |
| C | -0.19067900 | 1.17537100  | 0.20929500  |
| C | -0.90630600 | 0.00624200  | -0.01455900 |
| C | -0.19384900 | -1.16651300 | -0.22842600 |
| C | 1.18971300  | -1.18098200 | -0.21492600 |
| H | -0.73244200 | -2.08940700 | -0.41278700 |
| H | 1.72699400  | -2.10455400 | -0.38590700 |
| C | -2.40072500 | 0.00634400  | -0.00136300 |
| H | -2.80282500 | 0.96167100  | -0.33928400 |
| H | -2.80579700 | -0.77876200 | -0.64003700 |
| H | -2.78423300 | -0.16689600 | 1.00704200  |
| H | -0.72693100 | 2.10387500  | 0.37107200  |
| H | 1.73252700  | 2.10208200  | 0.40029800  |
| I | 3.98126200  | -0.00887000 | 0.03220300  |

$E_{\text{elec}}$  (a.u.): -566.59796

$E_{\text{elec}}$  N-1 system (a.u.): -566.29350

$E_{\text{elec}}$  N+1 system (a.u.): -566.55989

|   |             |             |             |
|---|-------------|-------------|-------------|
| C | 1.89205700  | 0.00075500  | 0.01210900  |
| C | 1.18441300  | 1.18881900  | -0.02994500 |
| C | -0.20001400 | 1.19615800  | -0.04243700 |
| C | -0.90644300 | 0.00078200  | -0.01018300 |
| C | -0.19405900 | -1.19167200 | 0.02866500  |
| C | 1.18817700  | -1.19176100 | 0.04049200  |
| H | -0.73517500 | -2.13082700 | 0.04706300  |
| H | 1.72924500  | -2.12895000 | 0.06883100  |
| C | -2.40129600 | -0.00127700 | 0.00543300  |
| H | -2.78117000 | -0.12169700 | 1.02261900  |
| H | -2.80780700 | 0.93062900  | -0.38658000 |
| H | -2.80267600 | -0.82440800 | -0.58665900 |
| H | -0.73908900 | 2.13557600  | -0.07948500 |
| I | 2.22720800  | 3.01477800  | -0.07970200 |
| H | 2.97367700  | 0.00381300  | 0.01861800  |
